# Supplementary material for: Structures and stabilization of kinetoplastid-specific split rRNAs revealed by comparing leishmanial and human ribosomes
Source: PubMed Central journal article supplement (PMC5071889; doi:10.1038/ncomms13223), 2016-10-18
Supplement: ncomms13223-s1.pdf [file ncomms13223-s1.pdf]

**a**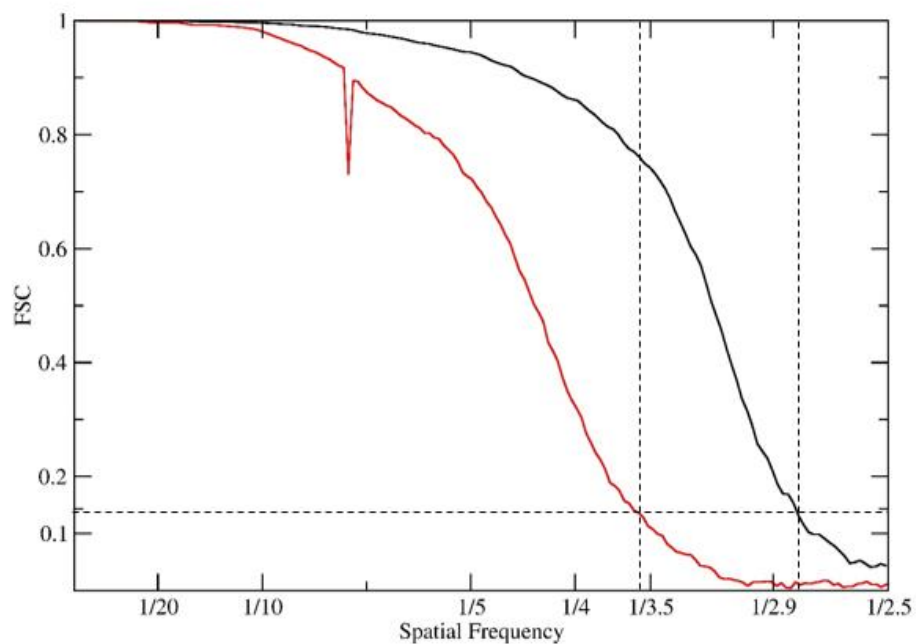

### Slices Through ResMap Results

**b**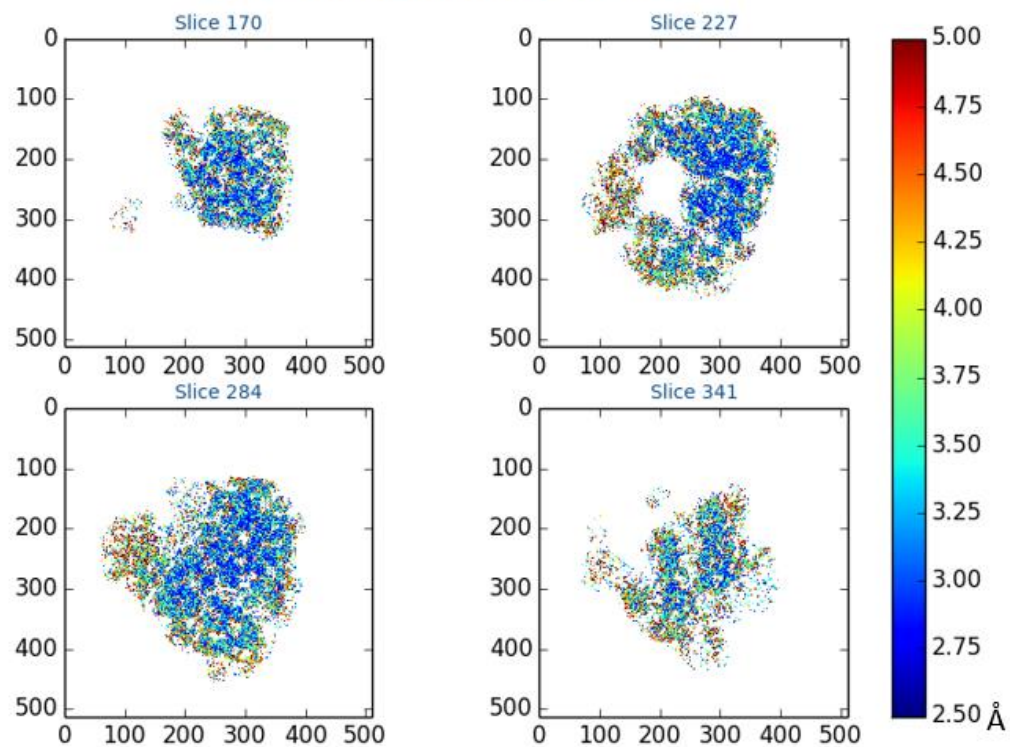

**c**

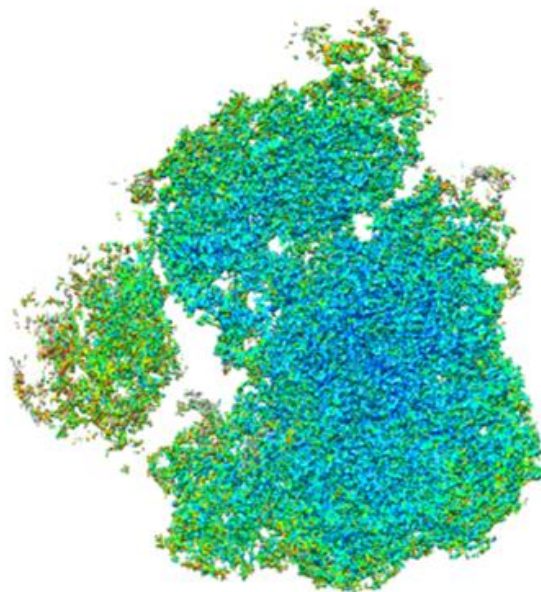

2.5 3.0 3.5 4.0 4.5 5.0 Å

**d**

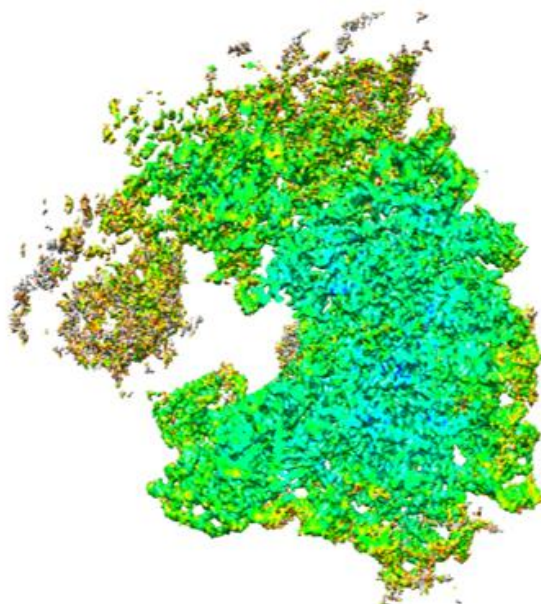

**Supplementary Figure 1: Resolution assessment.** (a) Gold standard Fourier shell cross-correlation coefficient of the leishmanial (black) and human ribosome (red) reconstructions by RELION<sup>1</sup>. (b) Local resolution assessment of the leishmanial ribosome reconstruction using Resmap<sup>2</sup>. (c) Colored surface representation of local resolution of the leishmanial ribosome (central section). (d) Colored surface representation of local resolution of the human ribosome (central section).

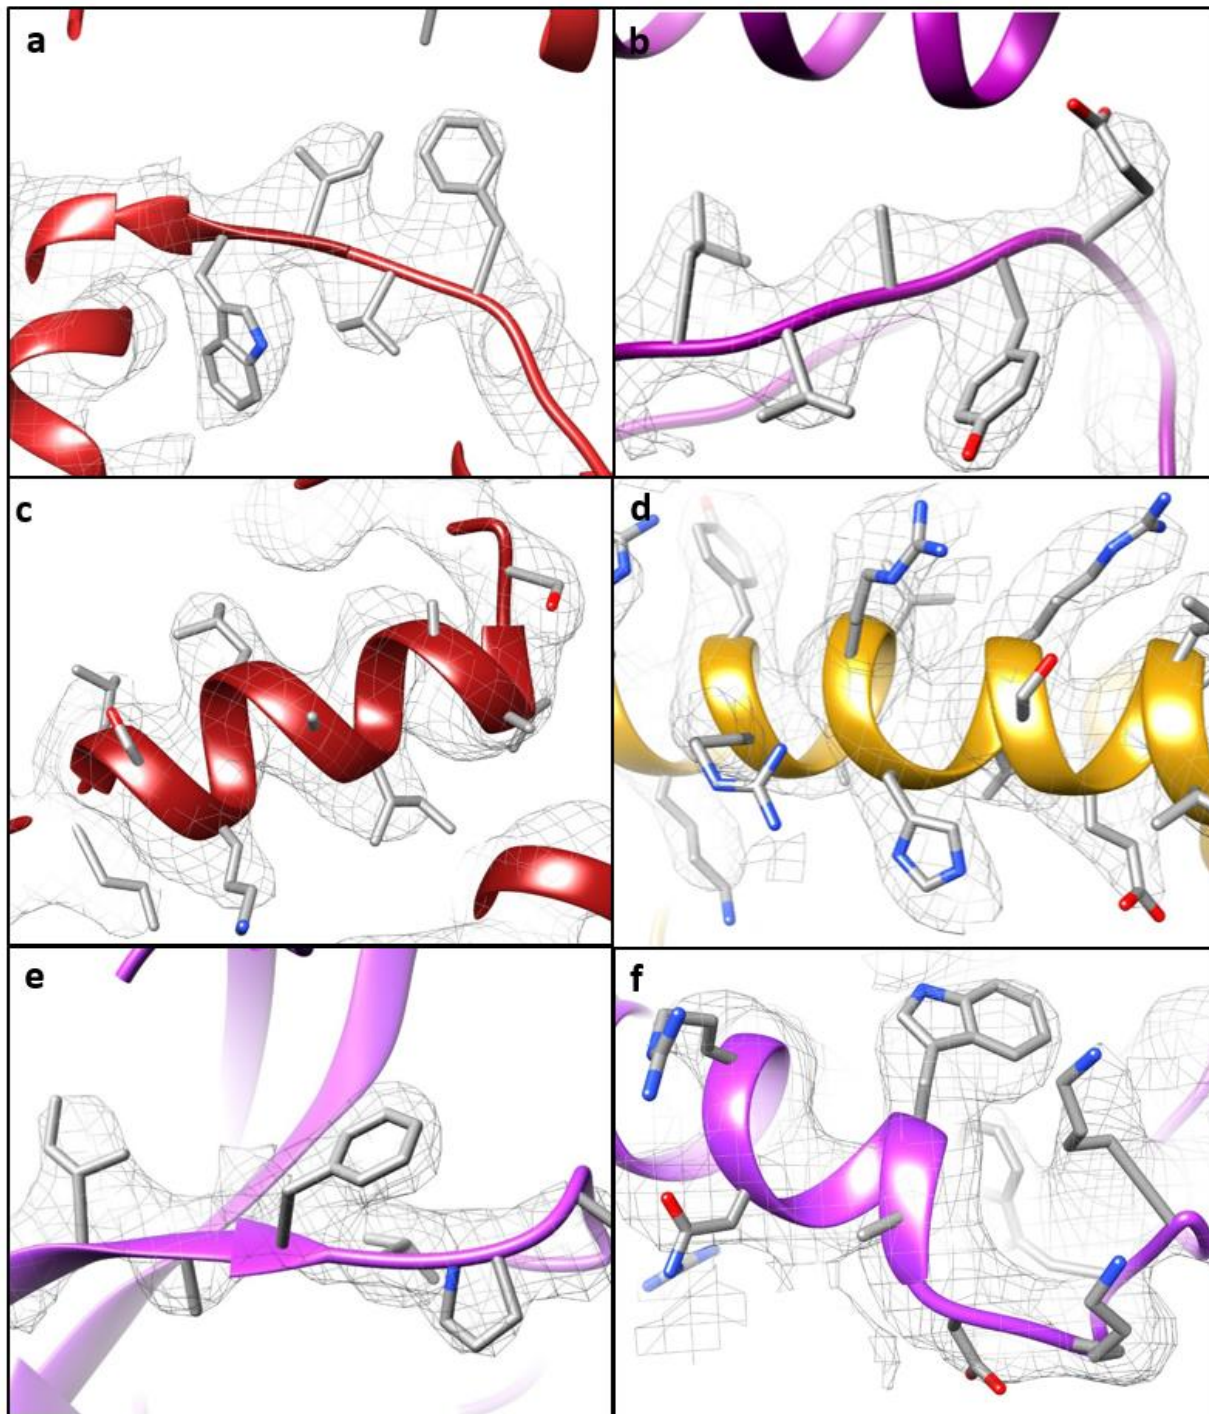

**Supplementary Figure 2: Typical protein side chain densities in LSU (a-c) and SSU (d-f) of the *L. donovani* ribosome.**

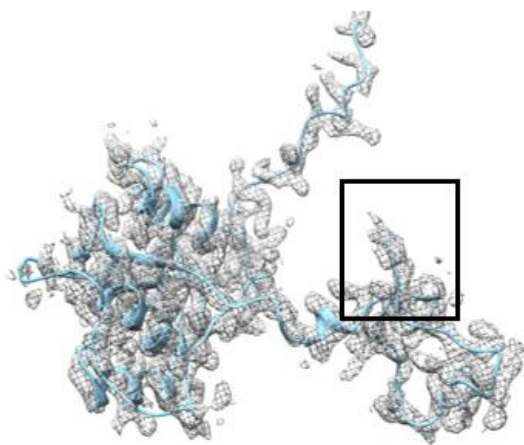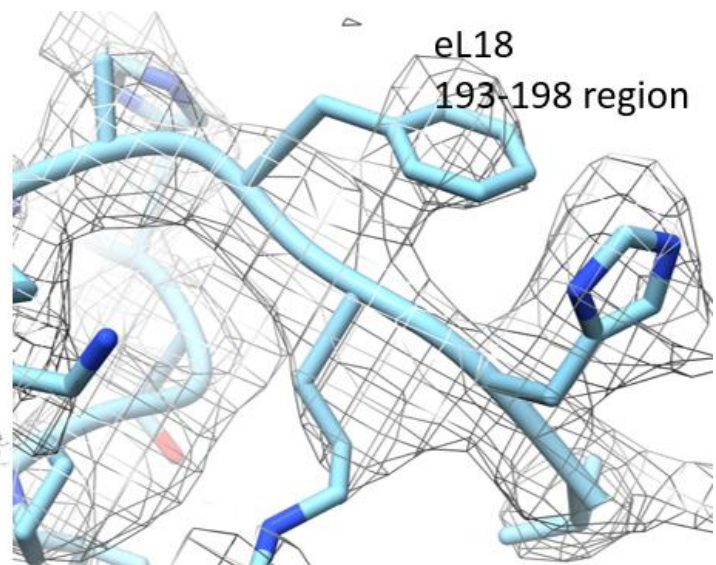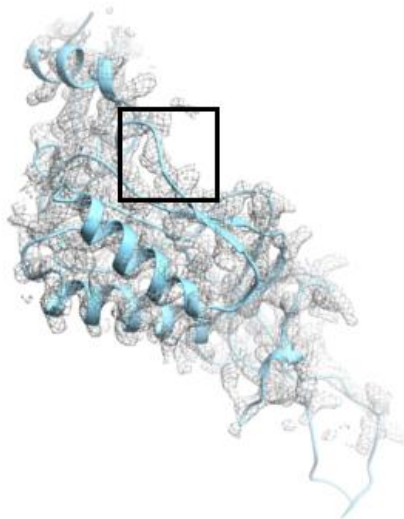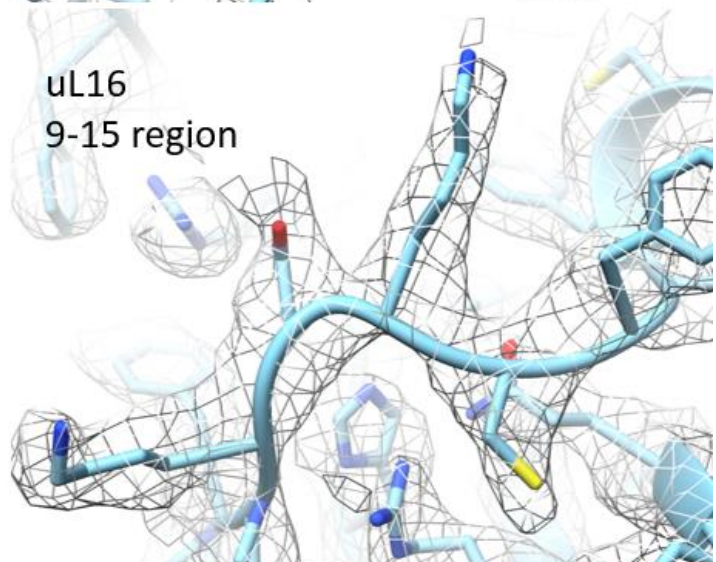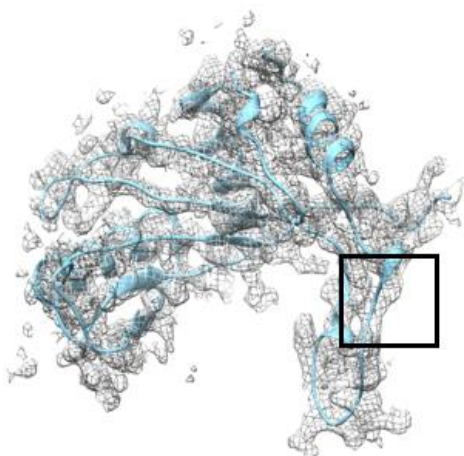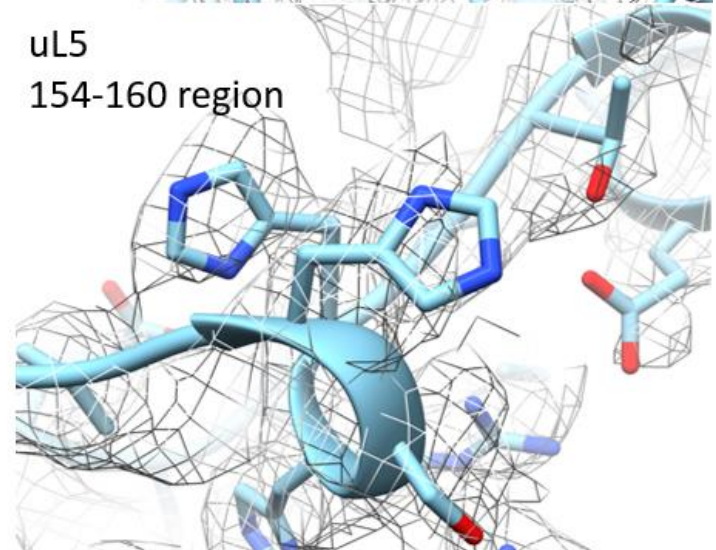

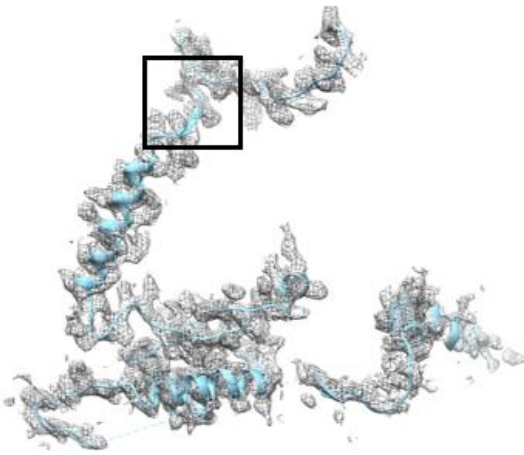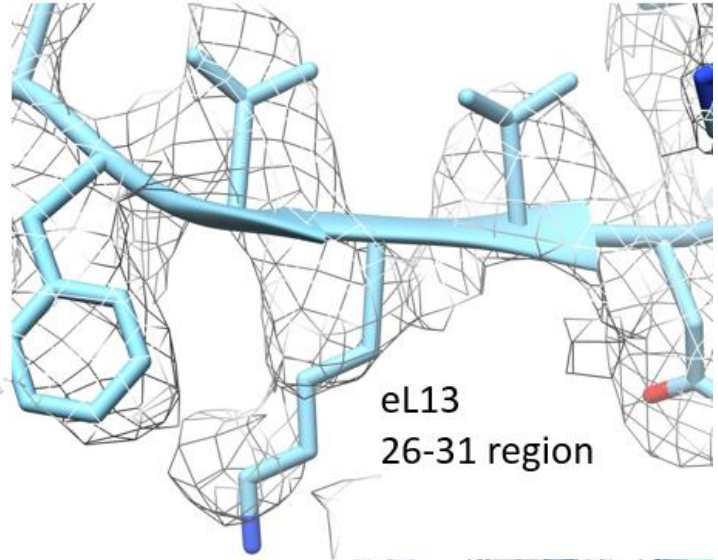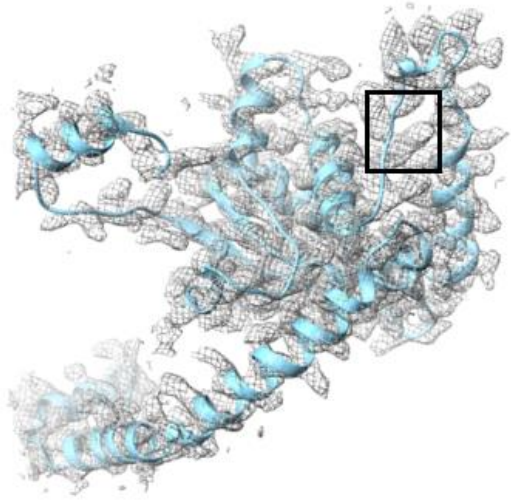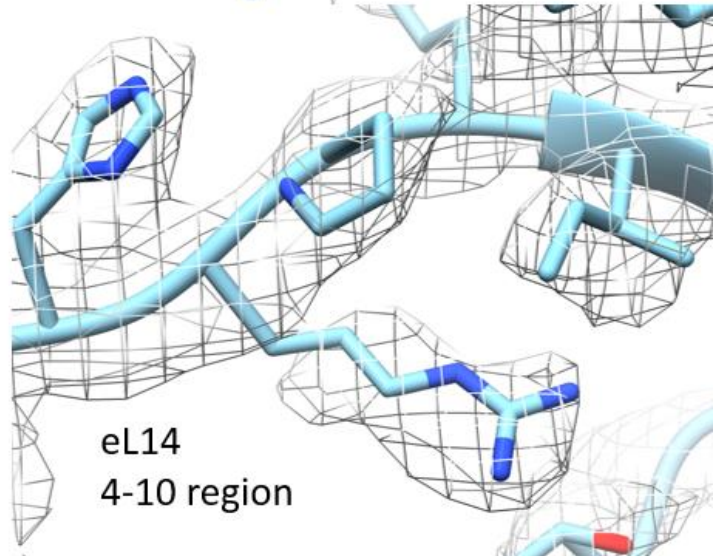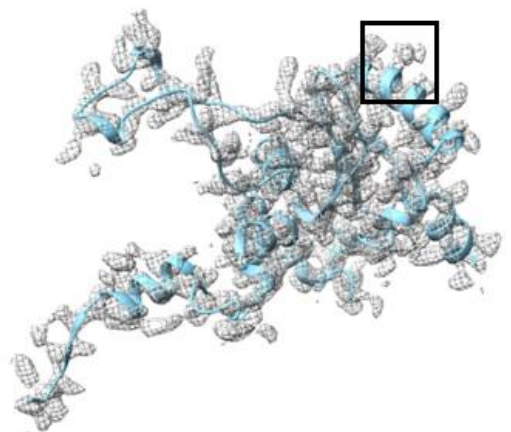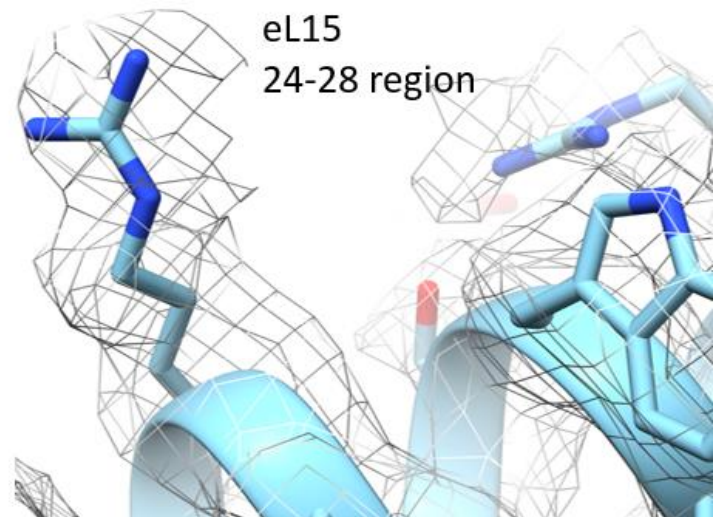

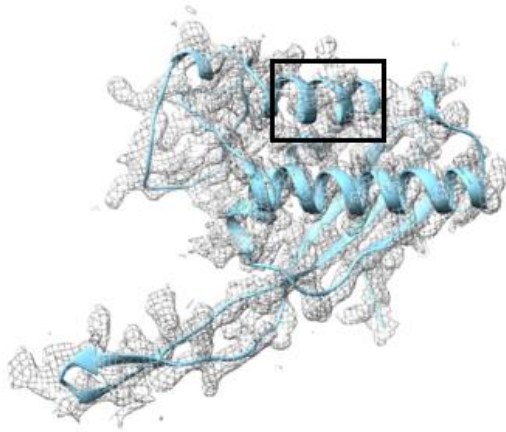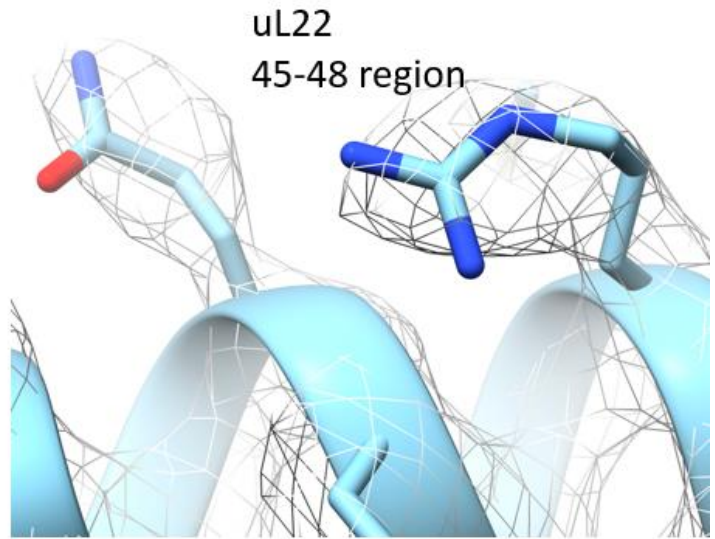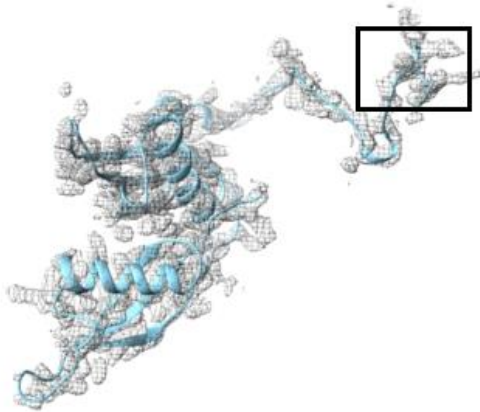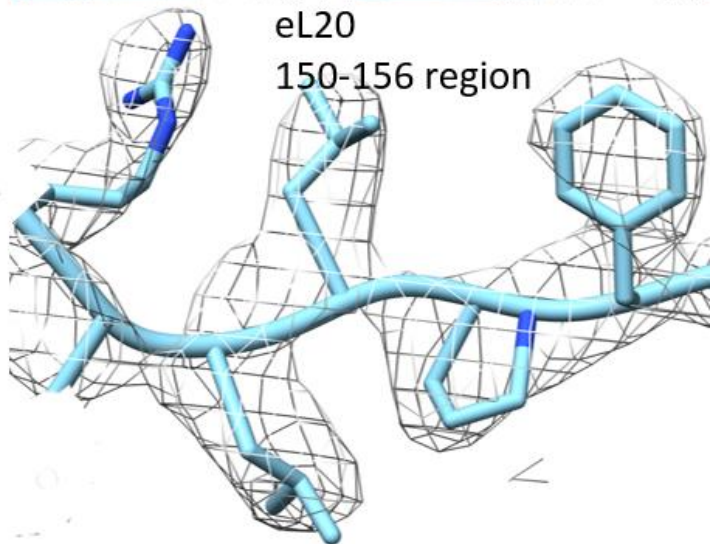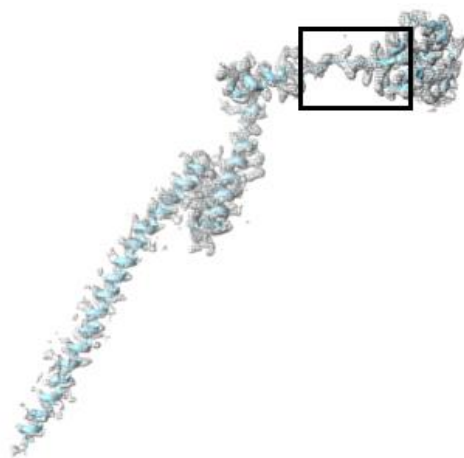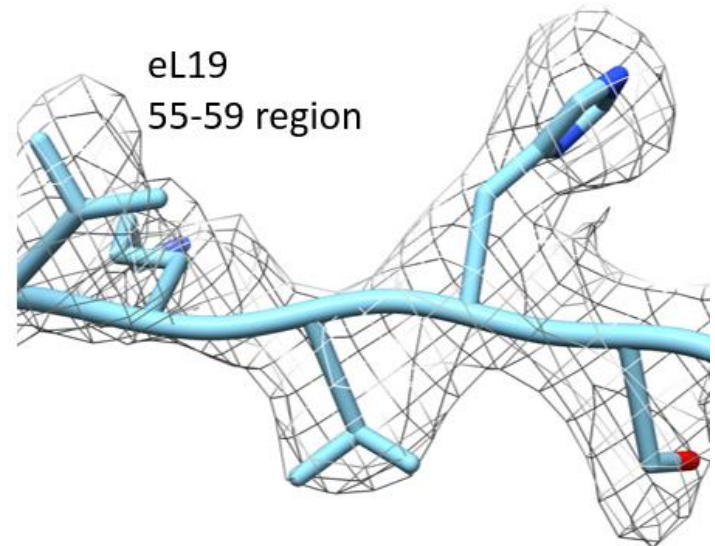

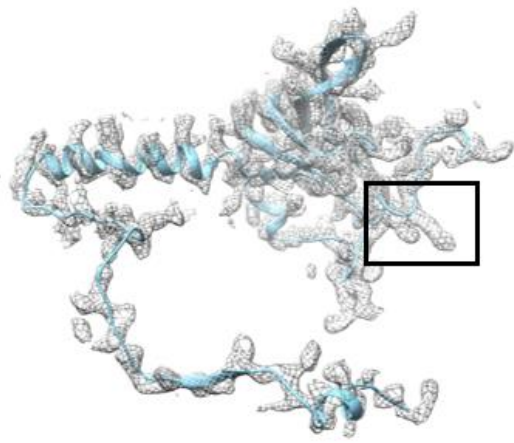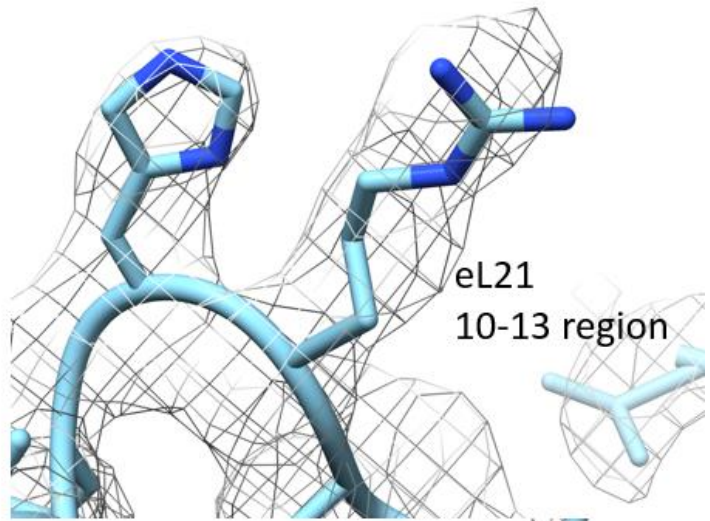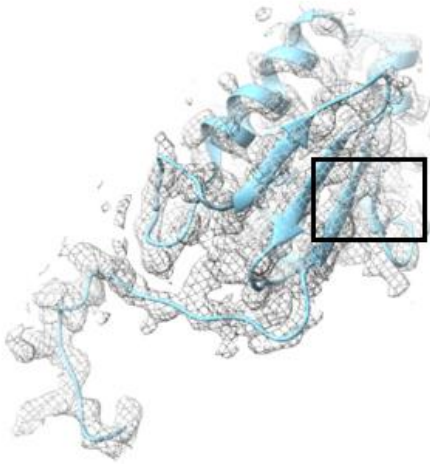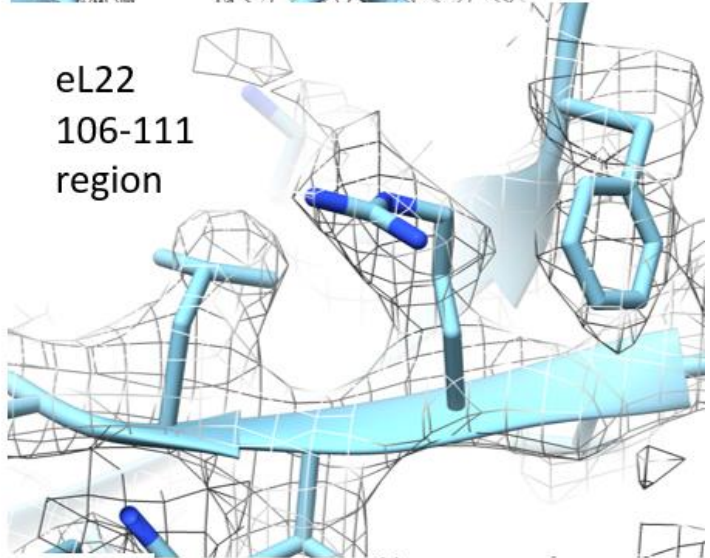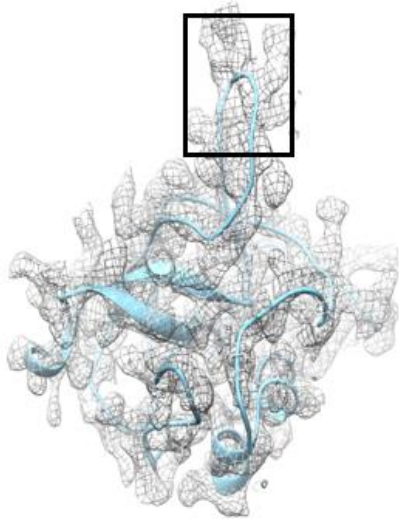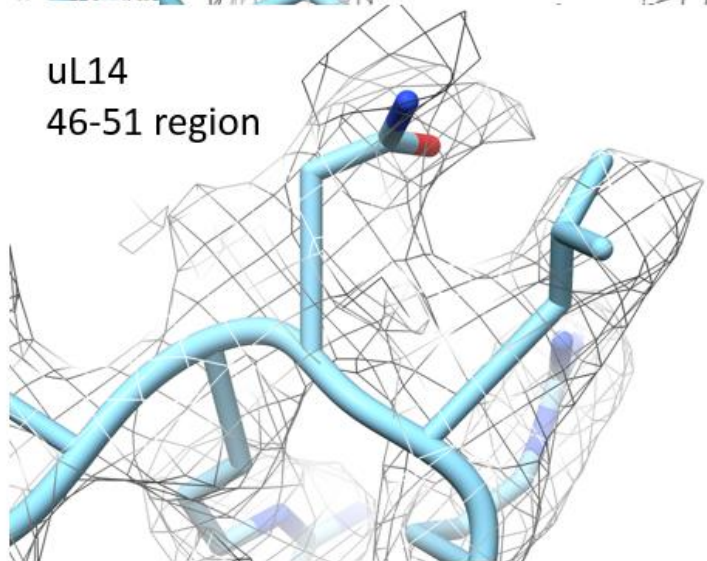

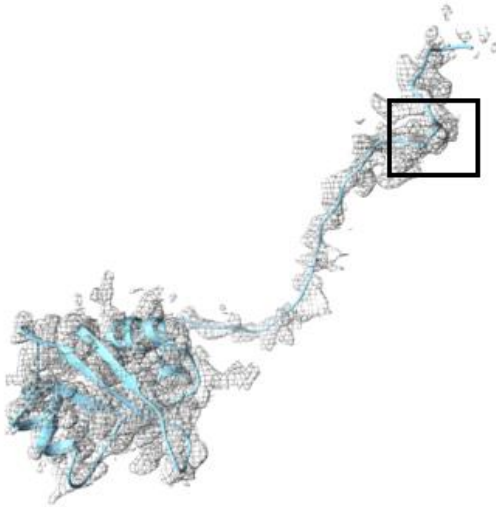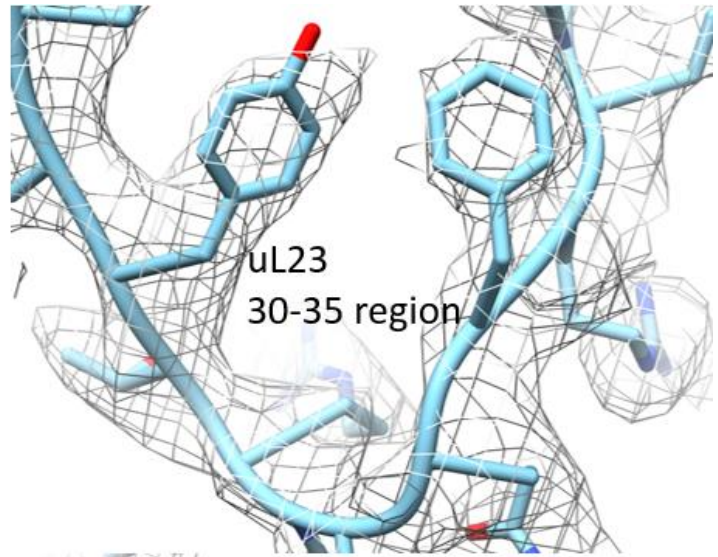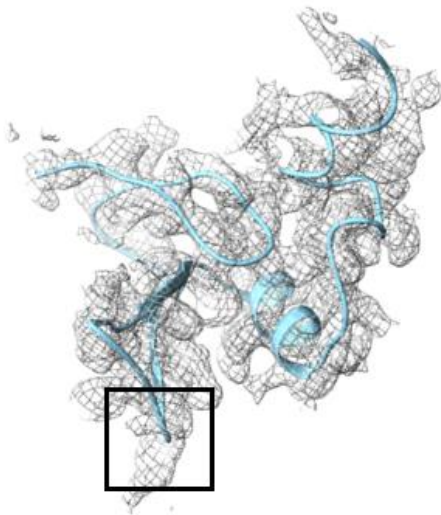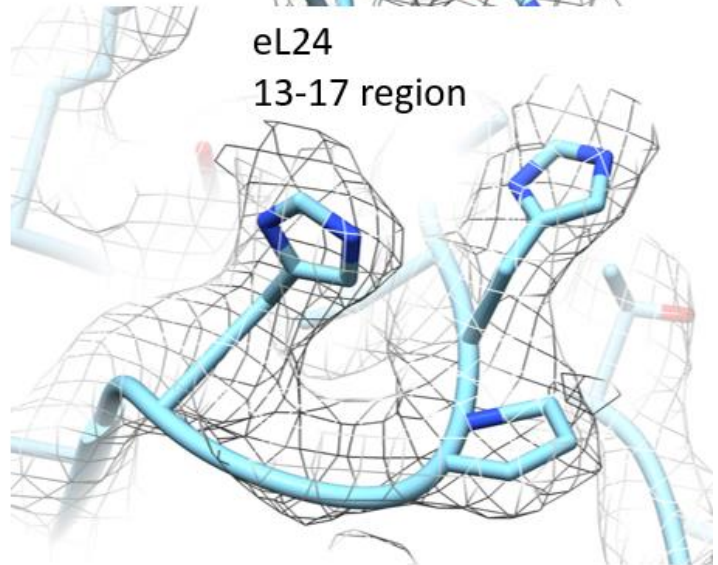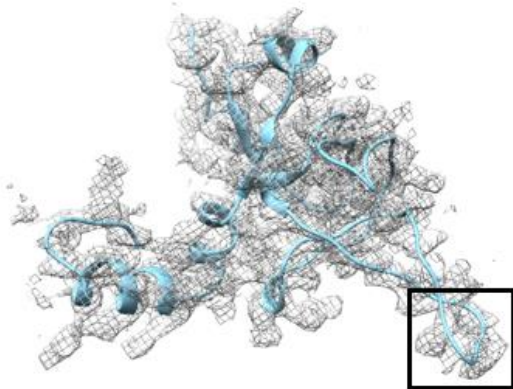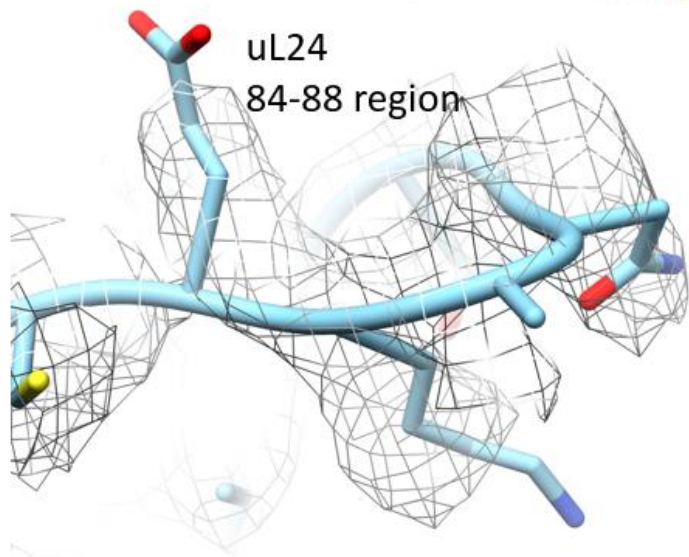



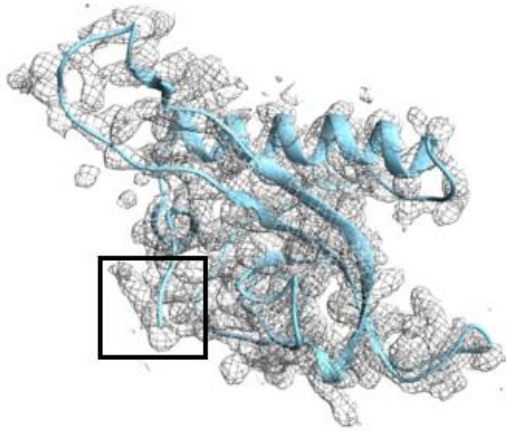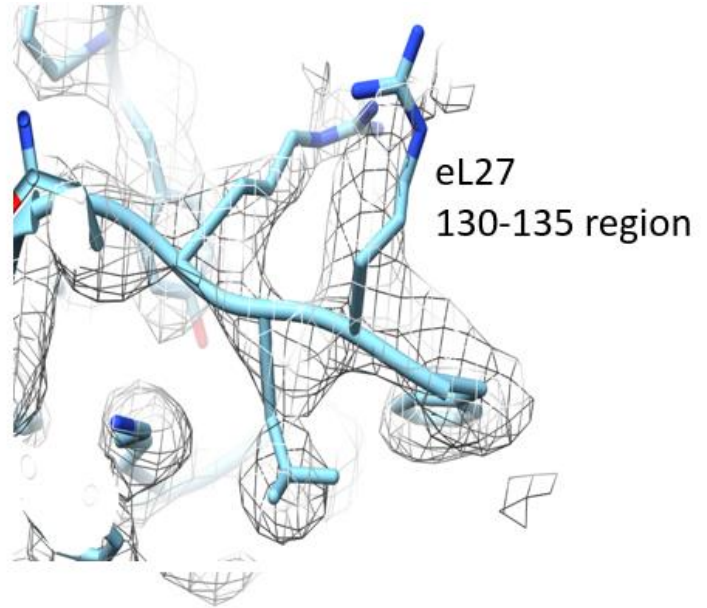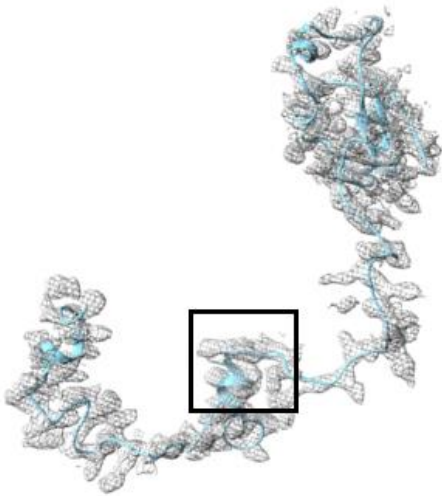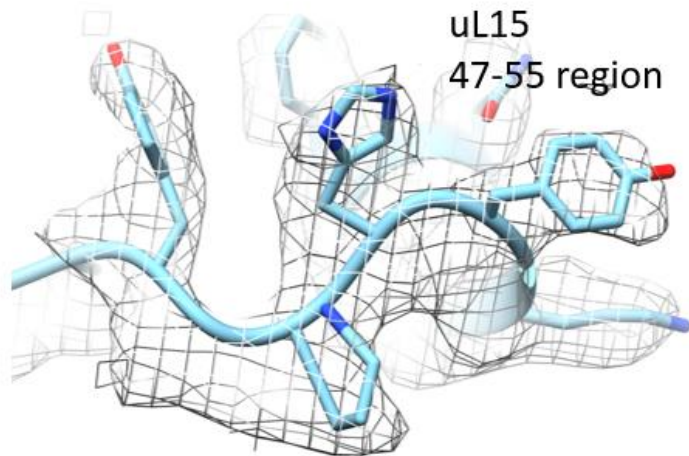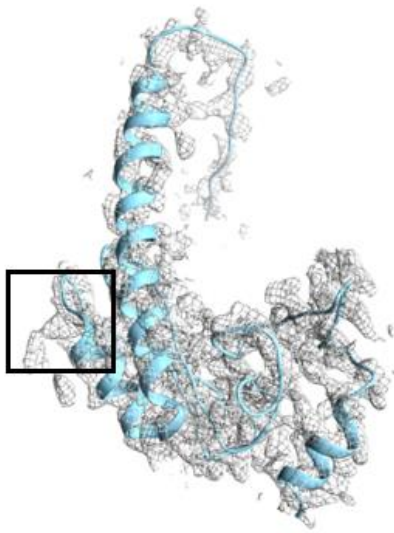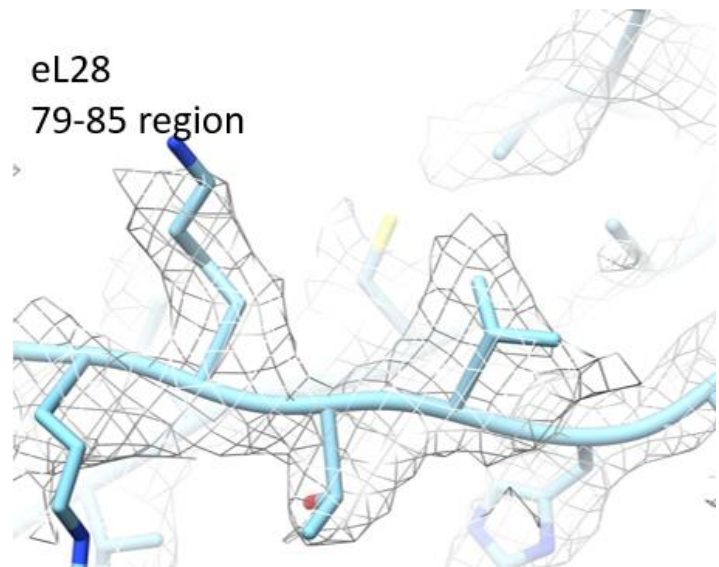

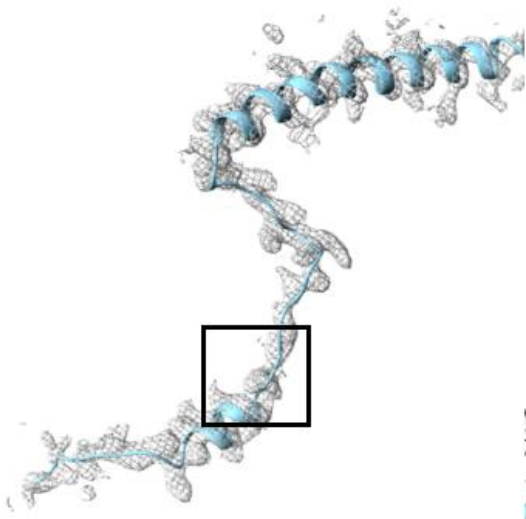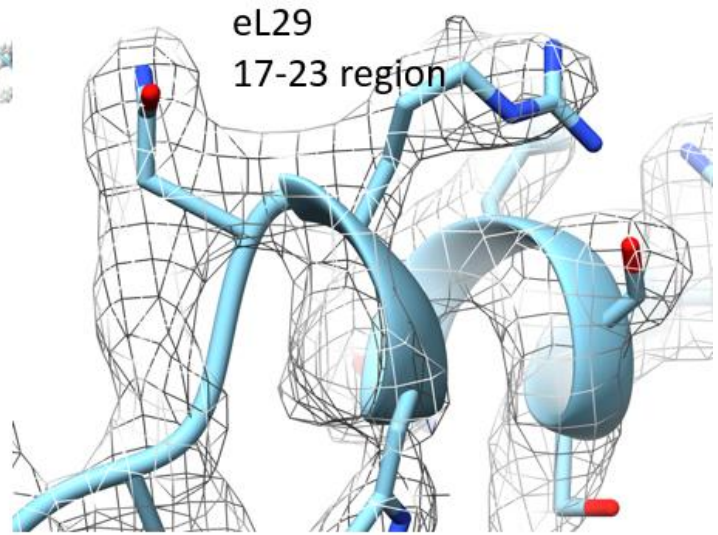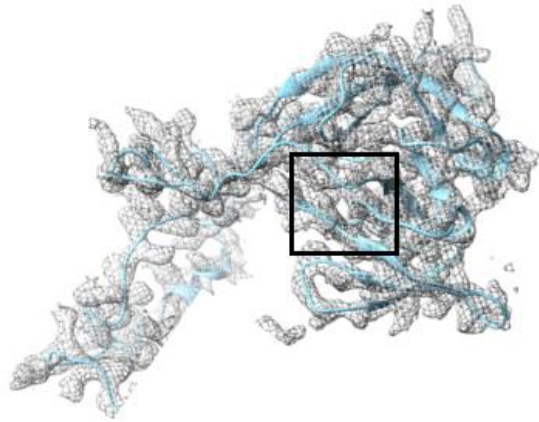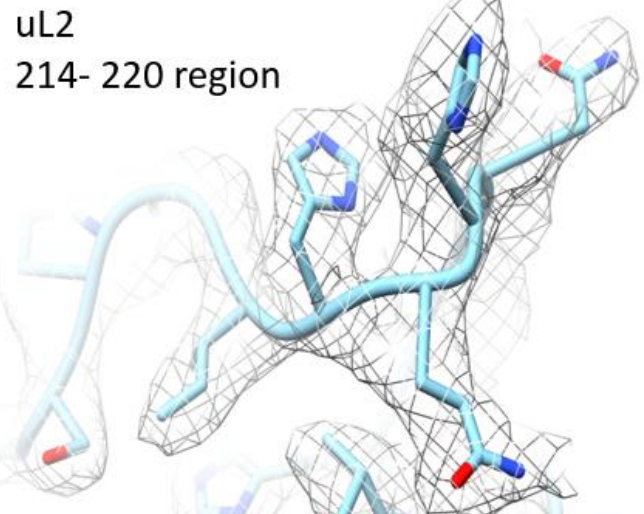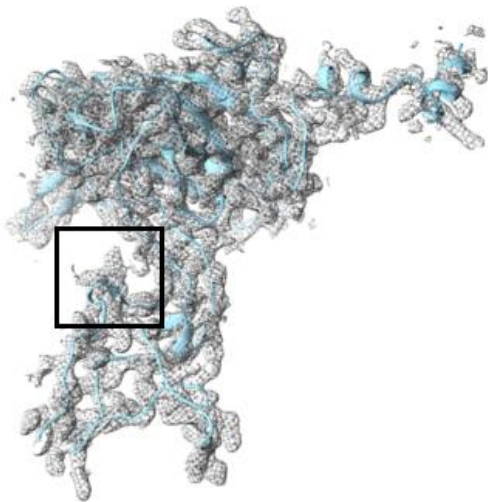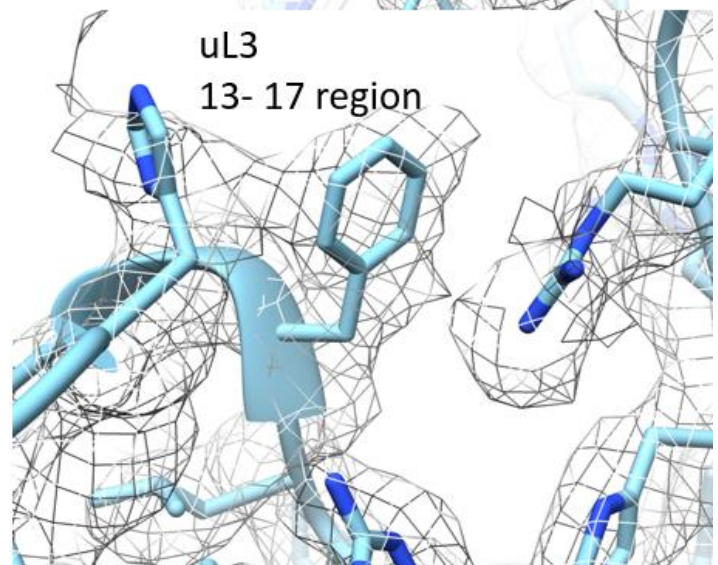

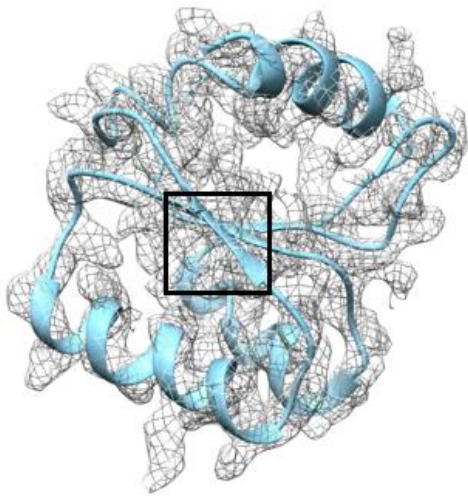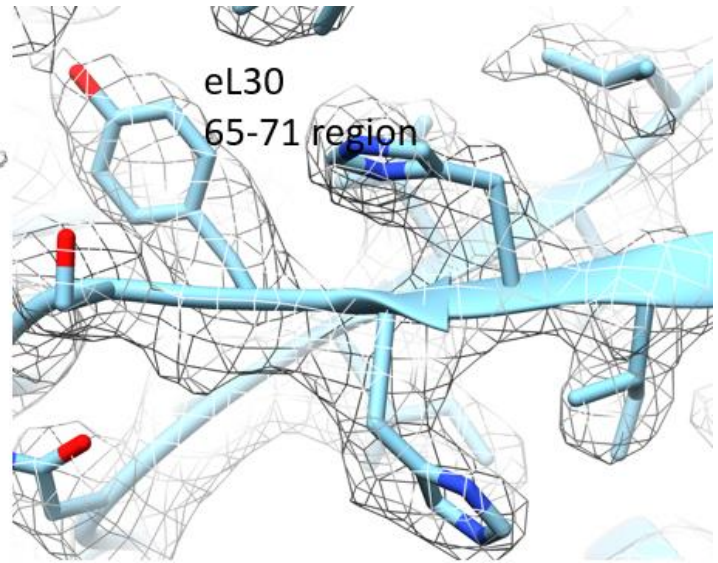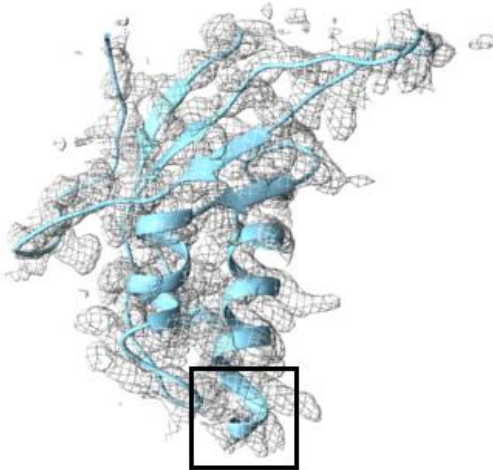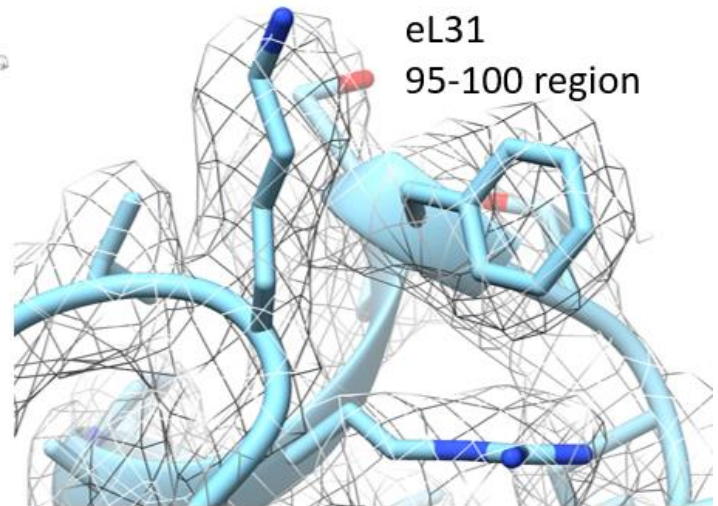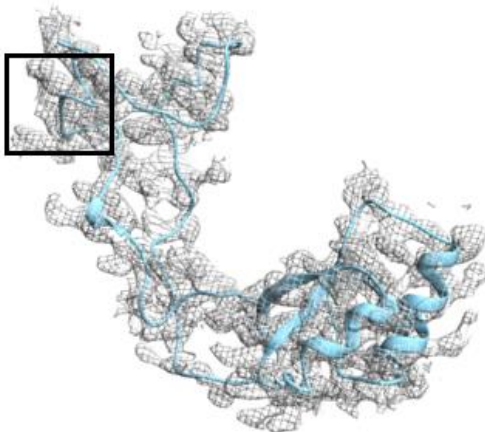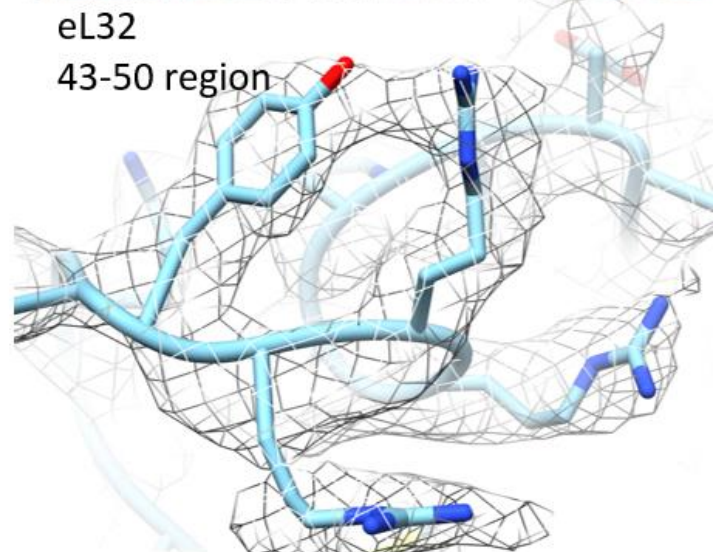

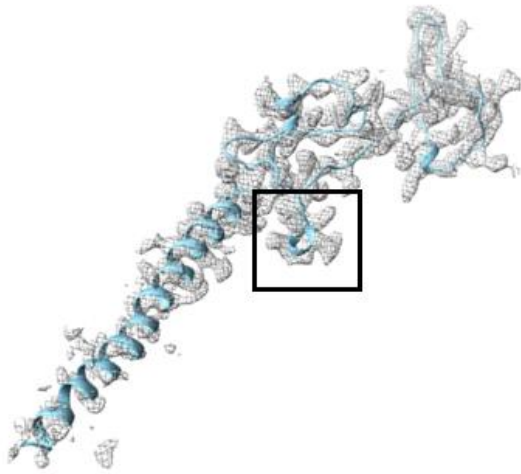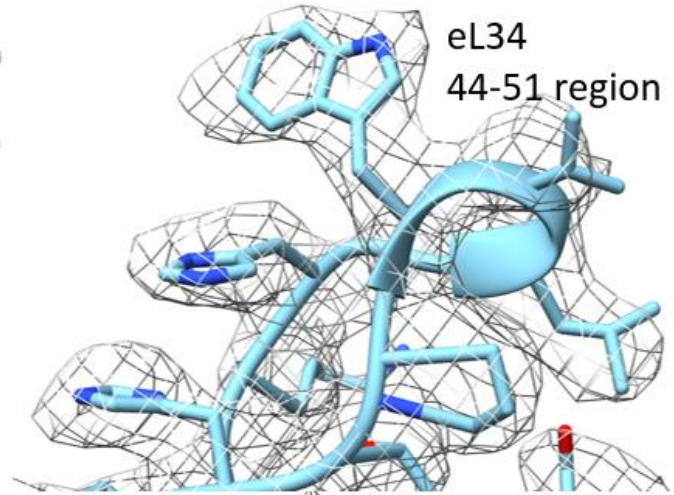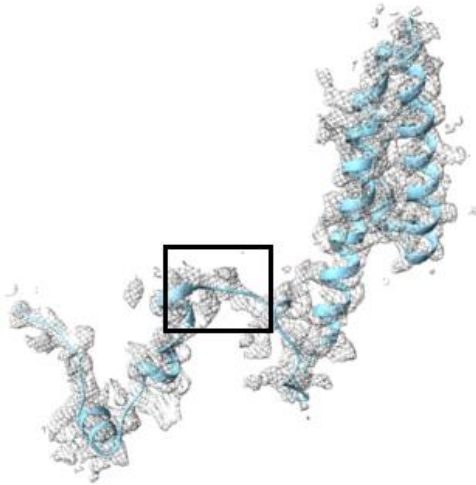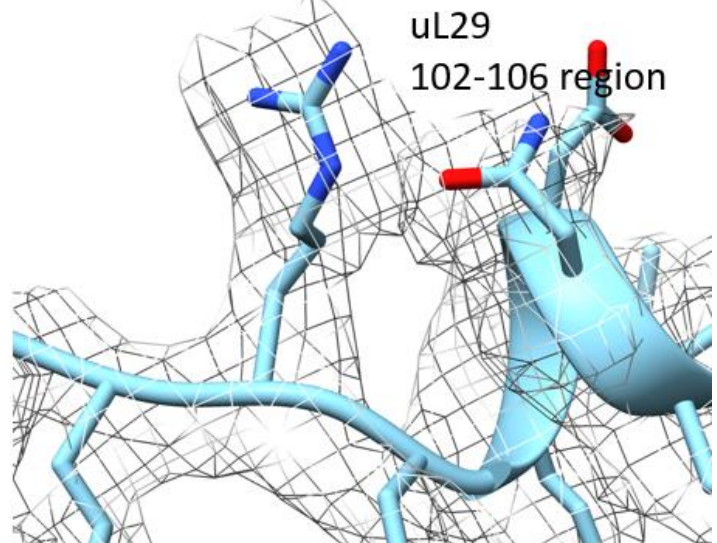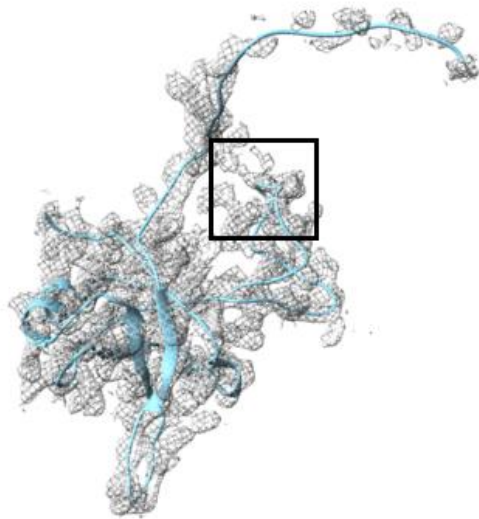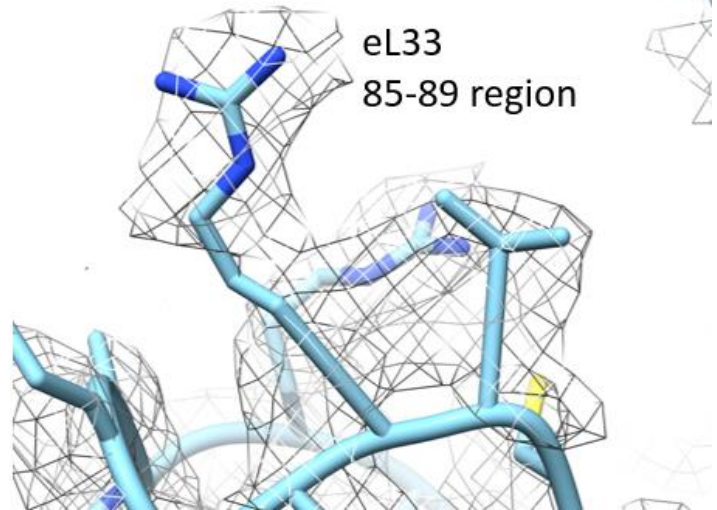

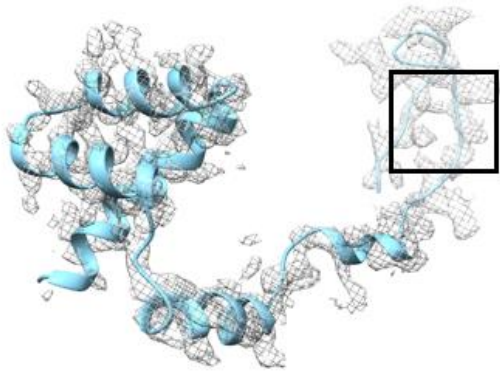

eL36  
18-21 region

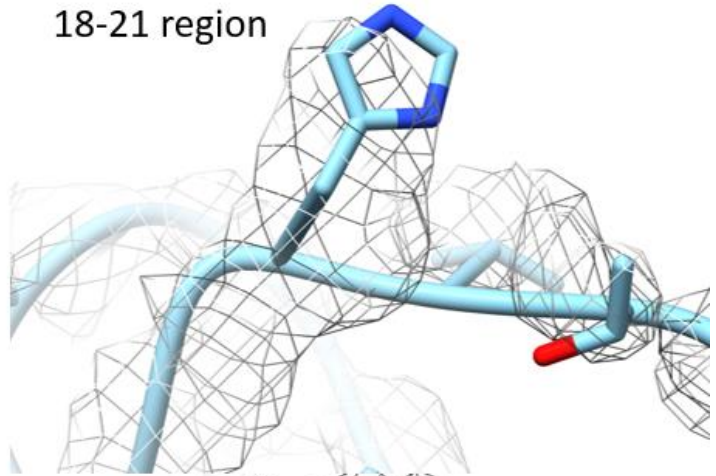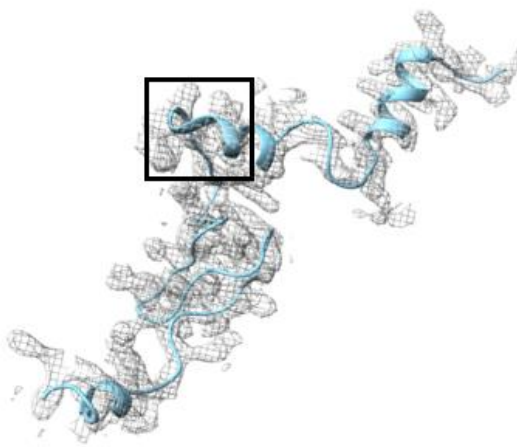

eL37  
50-57  
region

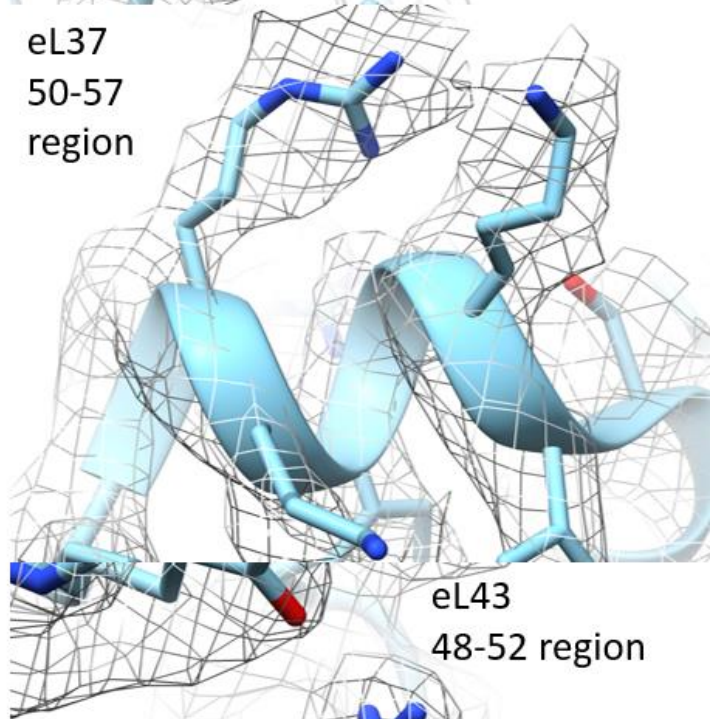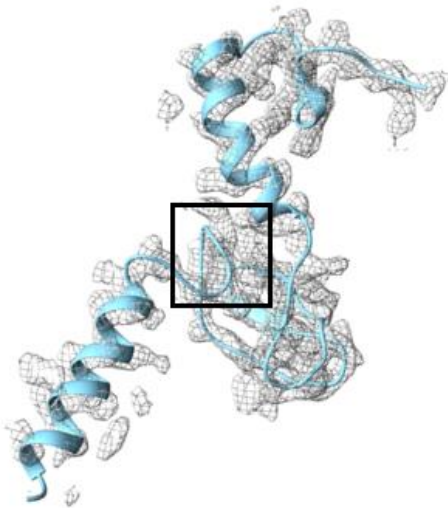

eL43  
48-52 region

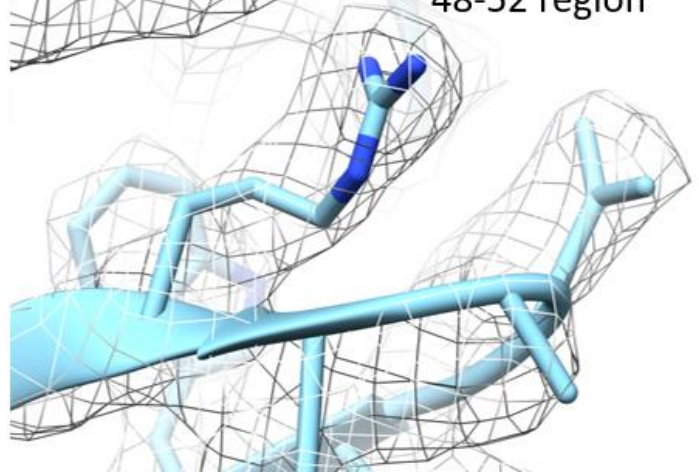

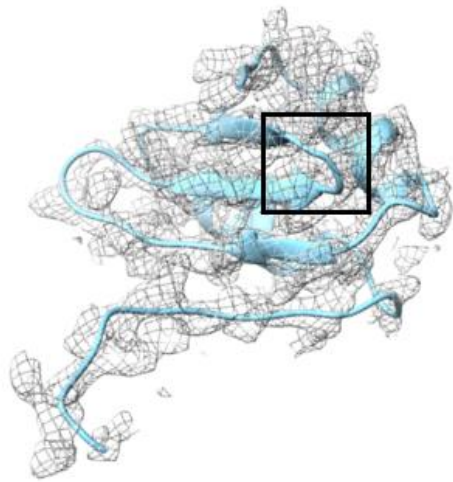

eL38  
39-44  
region

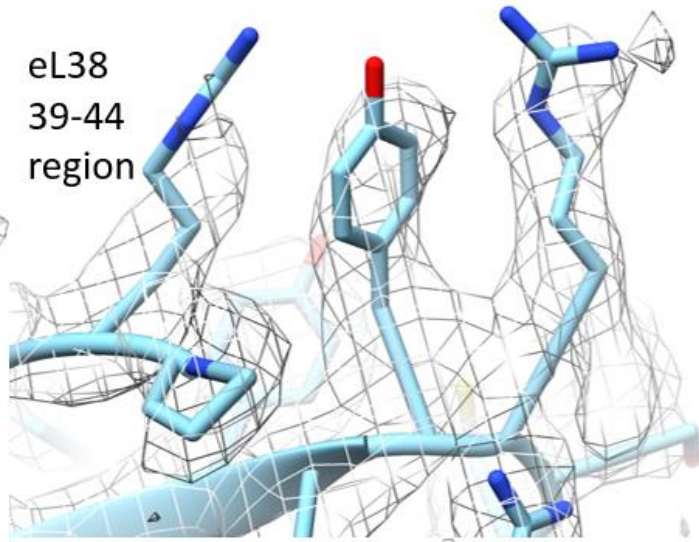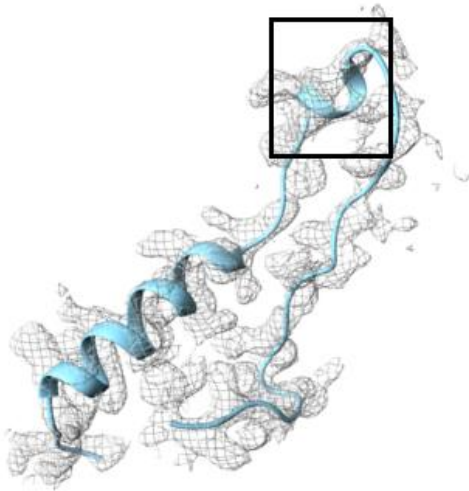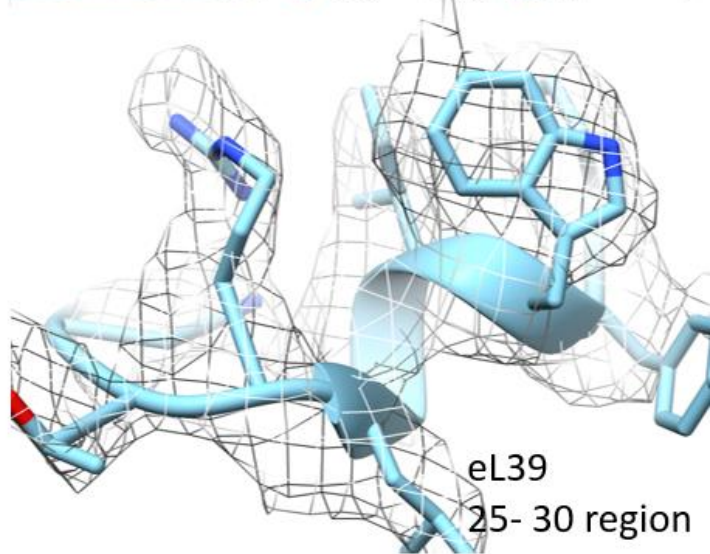

eL39  
25-30 region

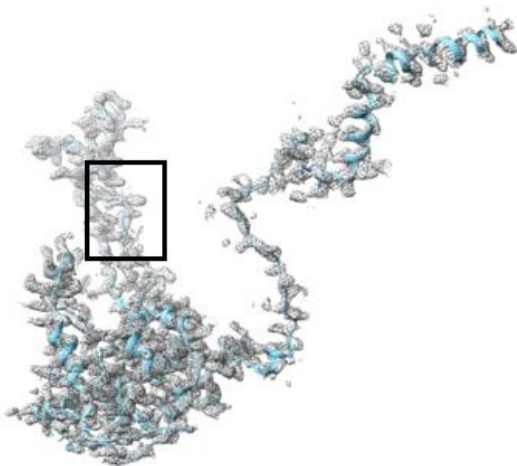

uL4  
99-105 region

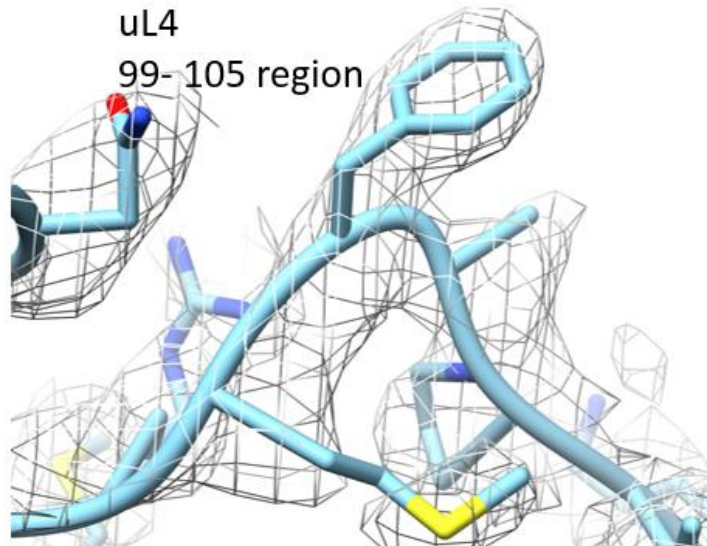

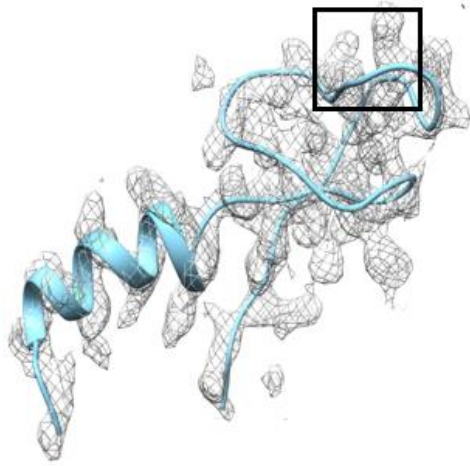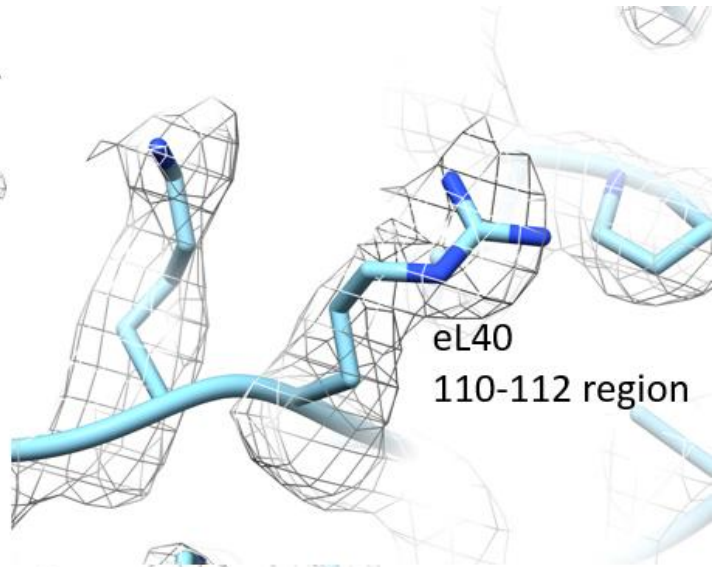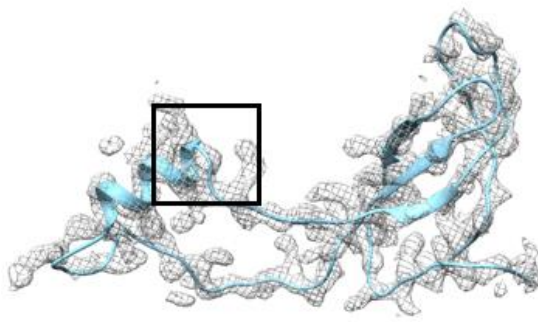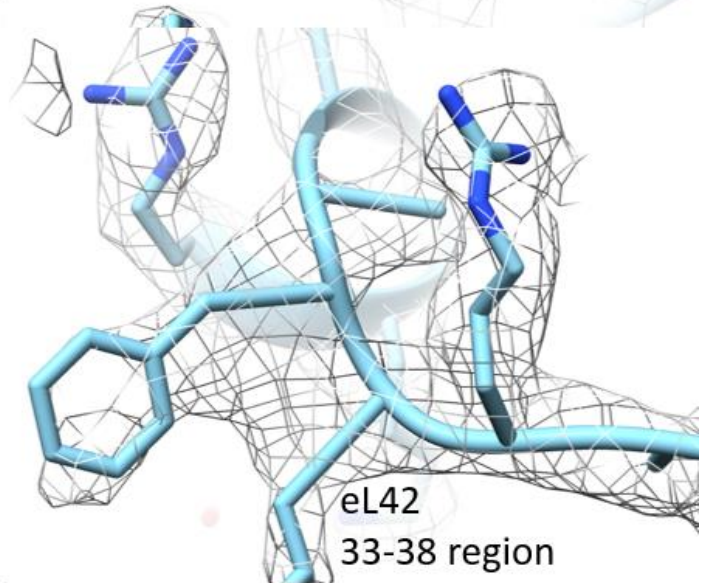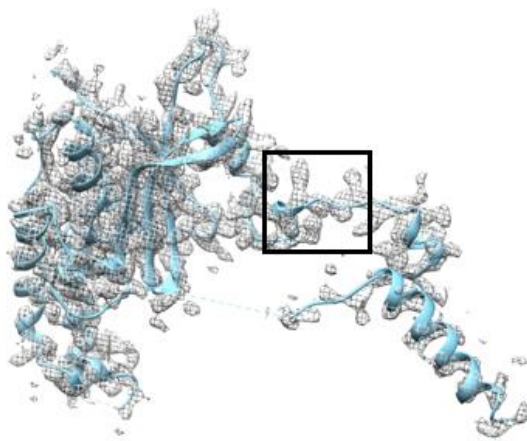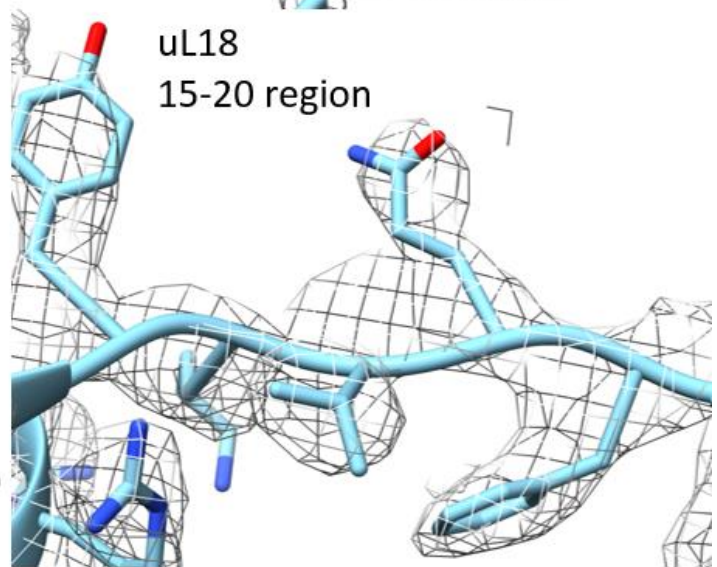

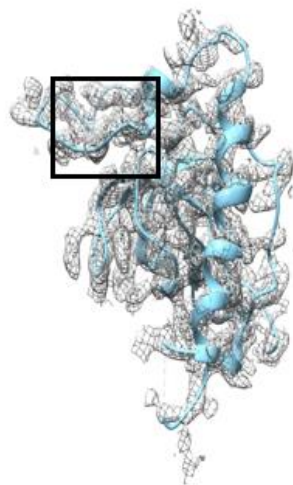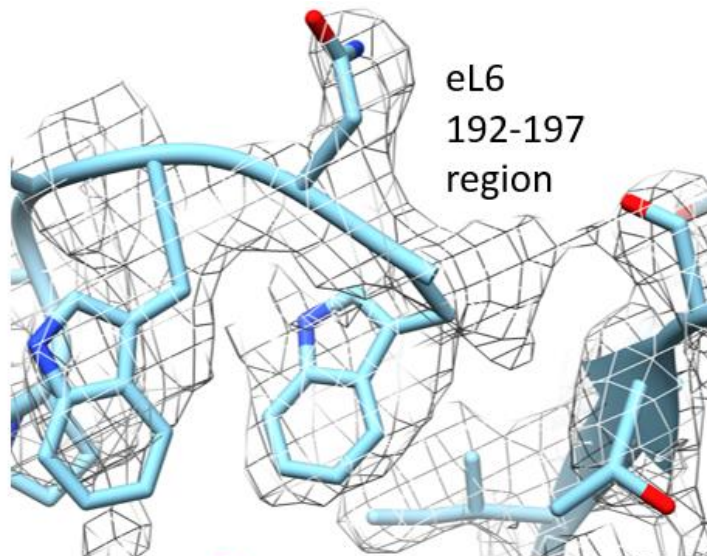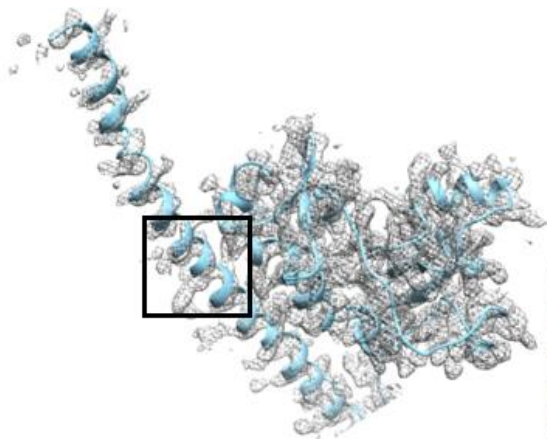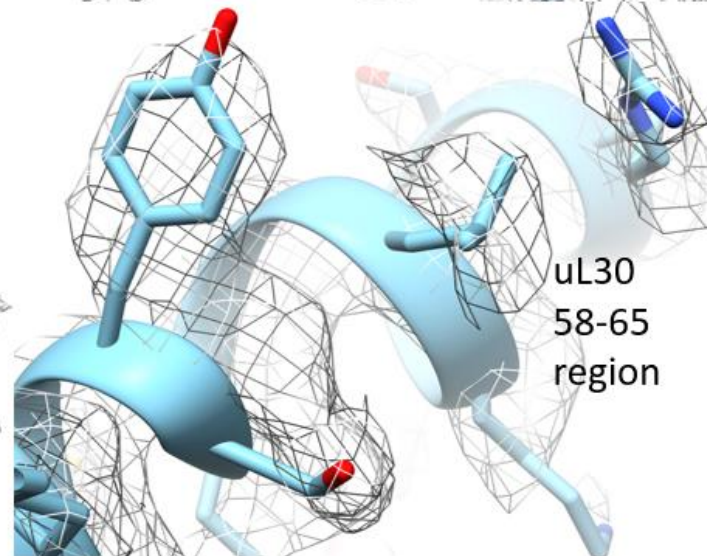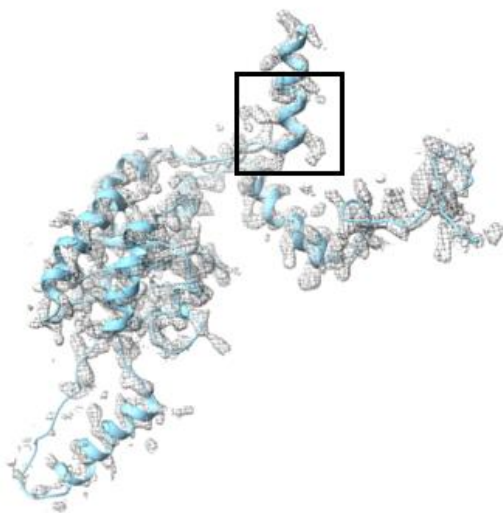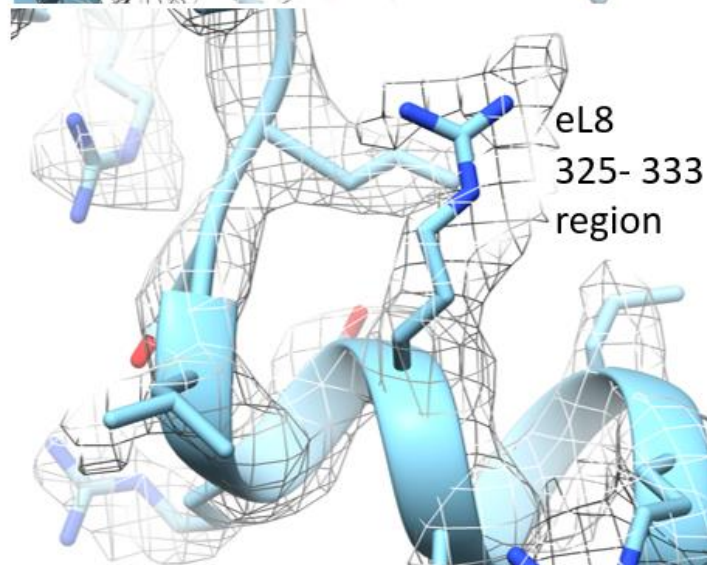



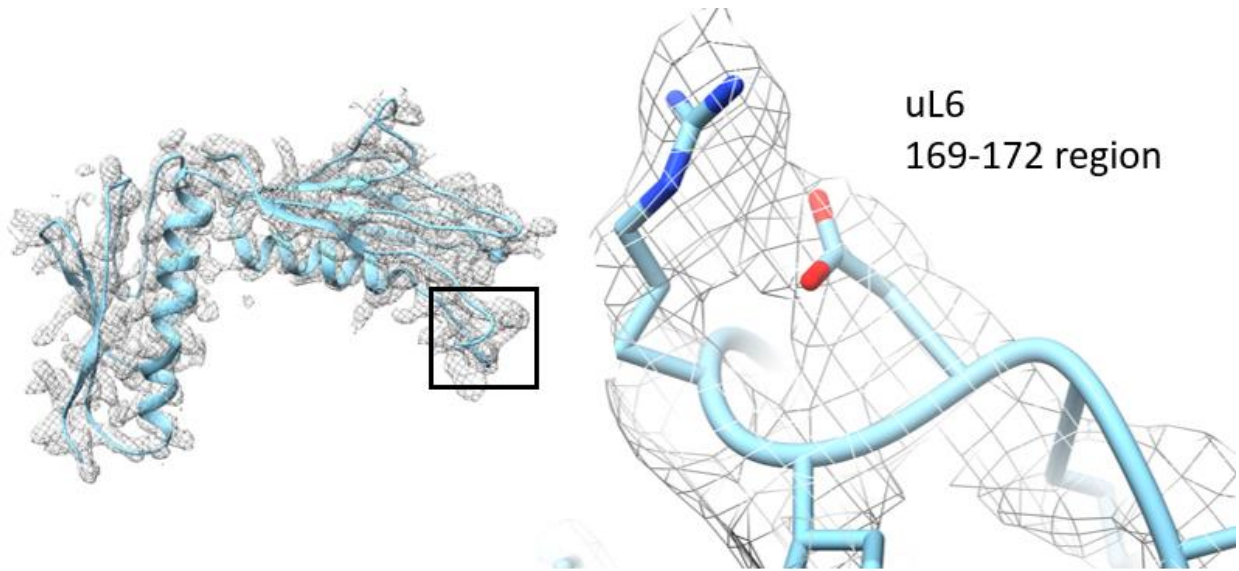

**Supplementary Figure 3: Density fits of modeled LSU proteins and selected regions showcasing high-resolution features.** Locations of selected regions on the protein are indicated by black box and correspond to the high-resolution features displayed adjacent to the protein. Region numberings correspond to amino acid sequence.

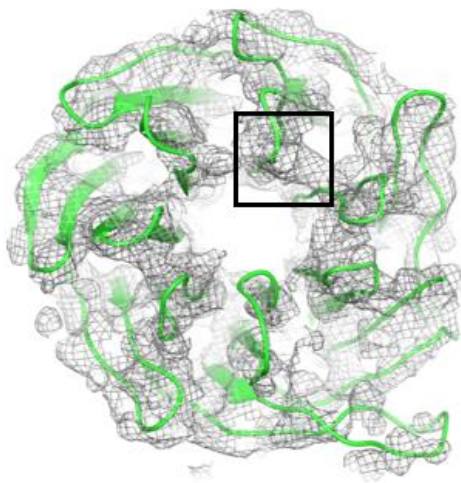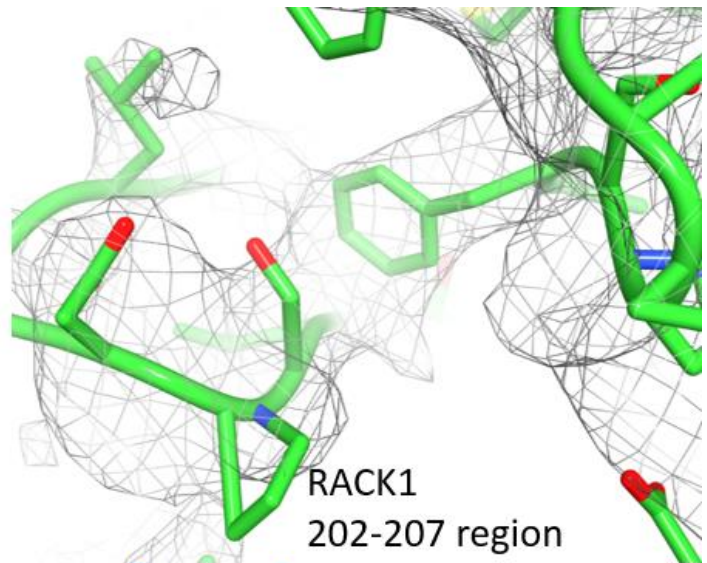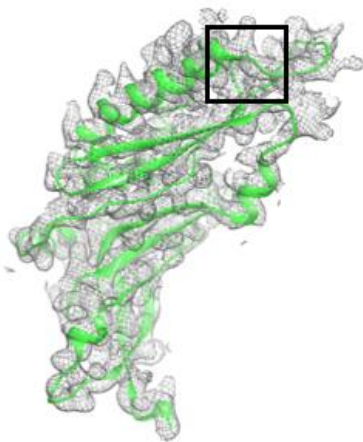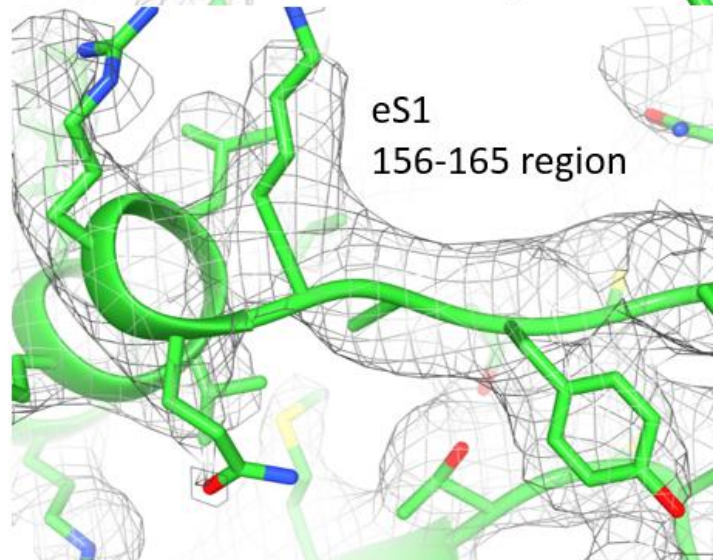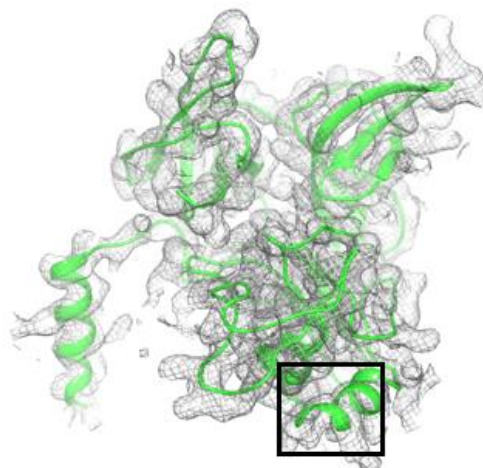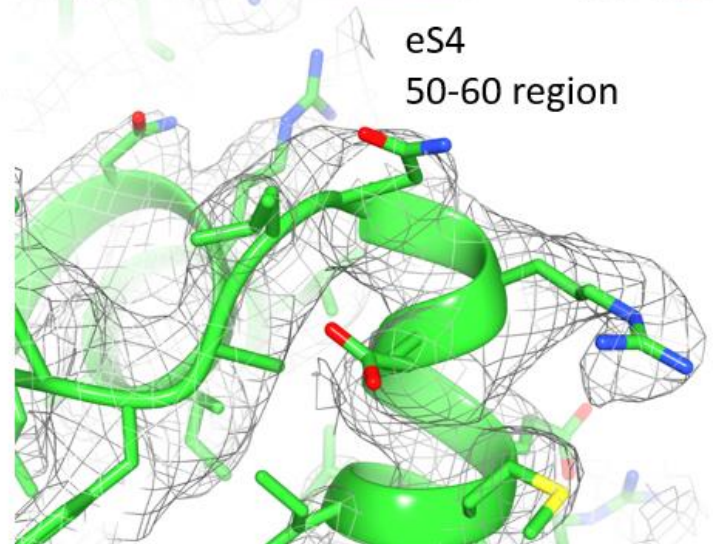

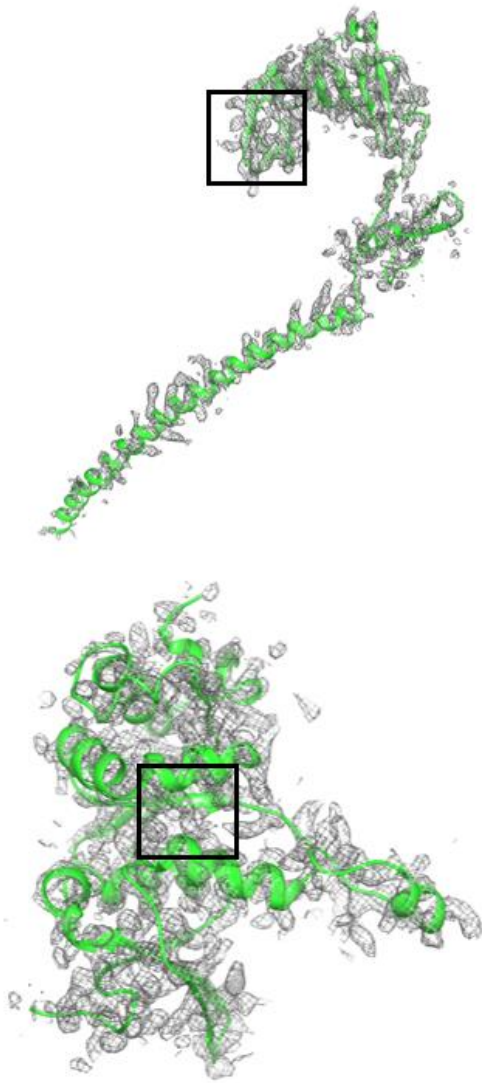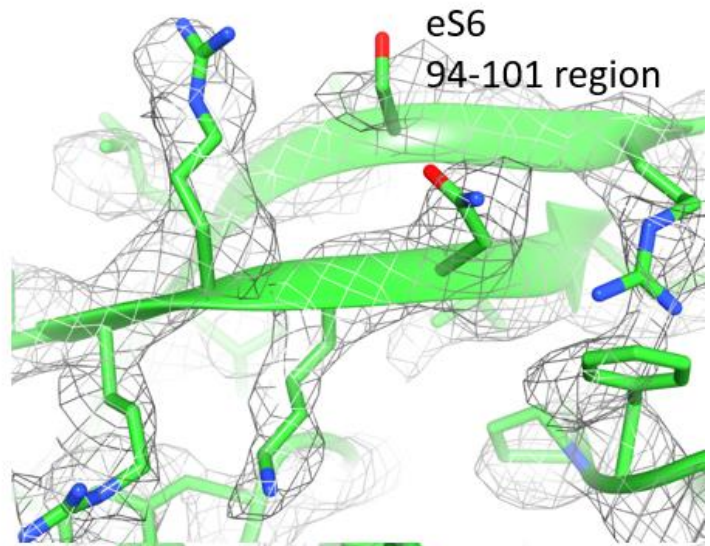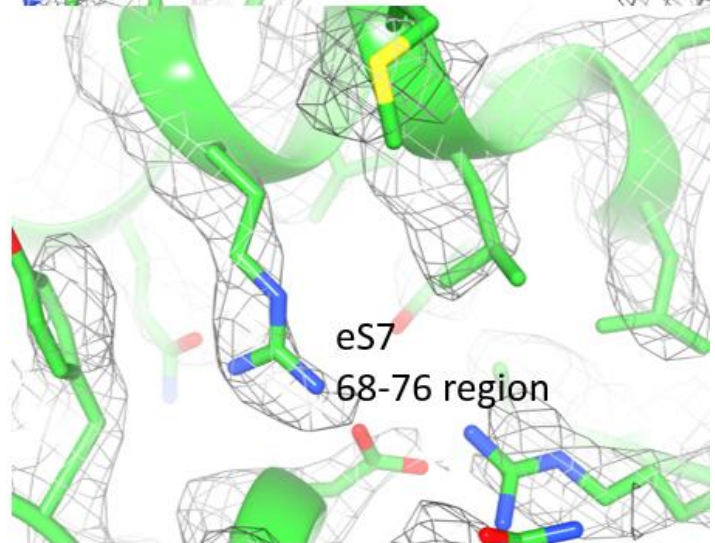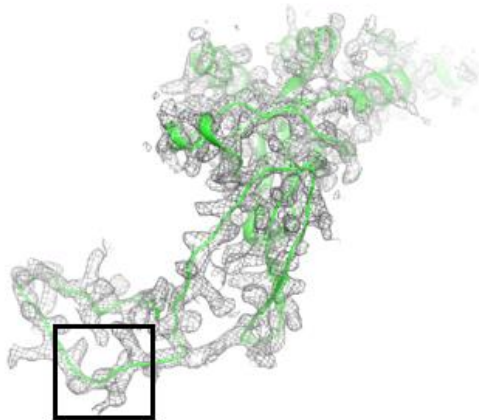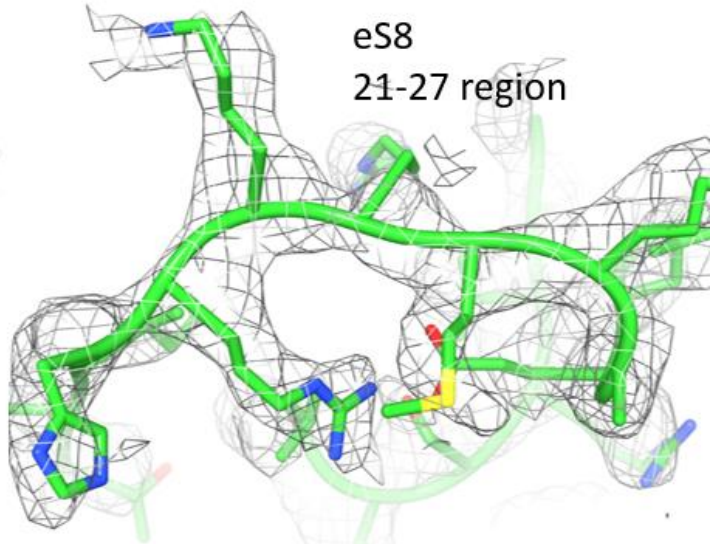

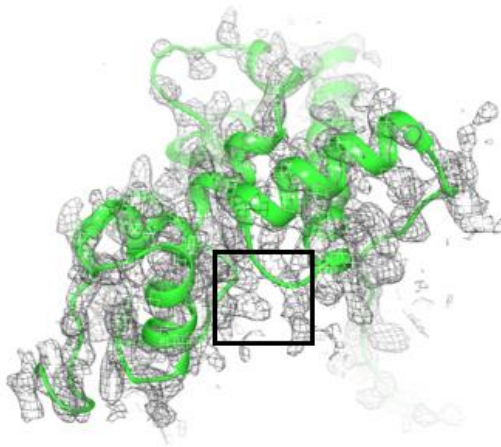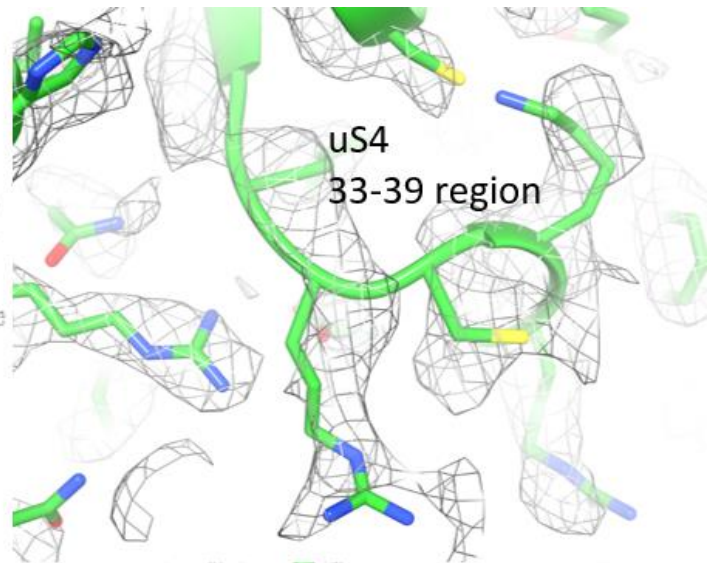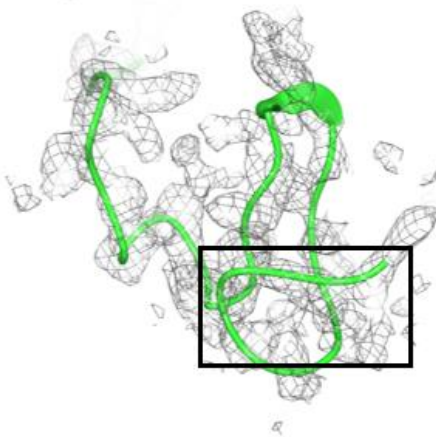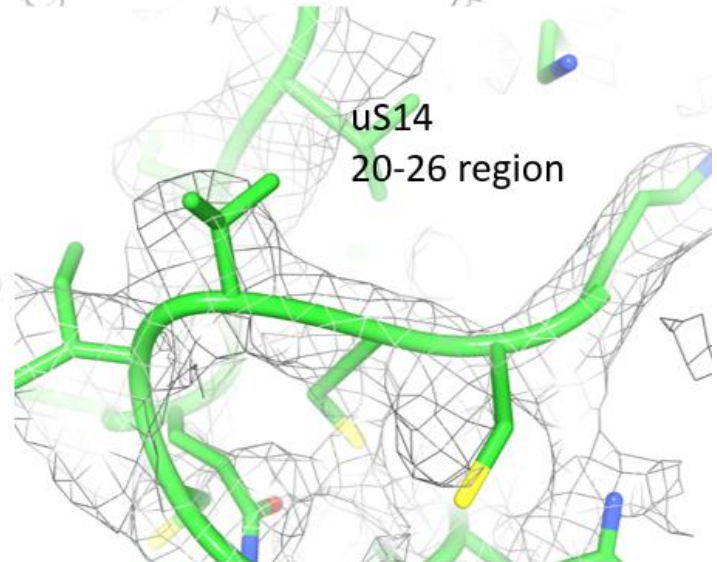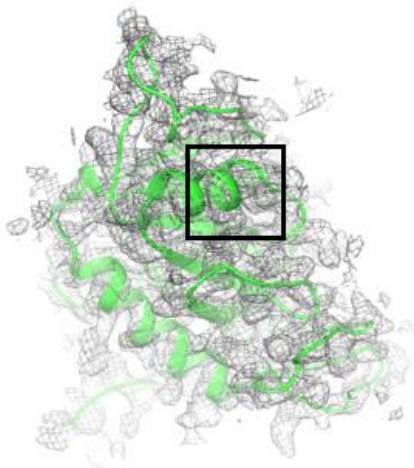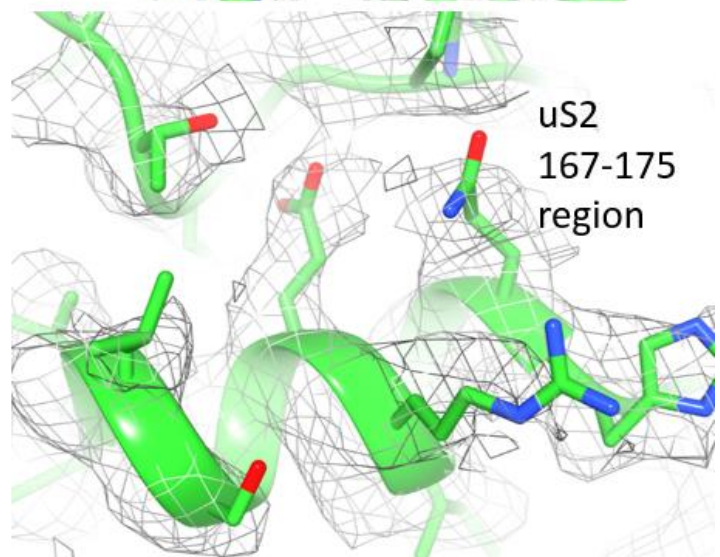

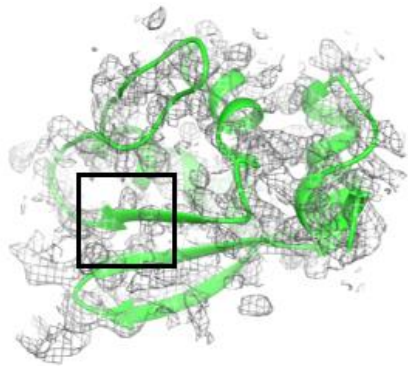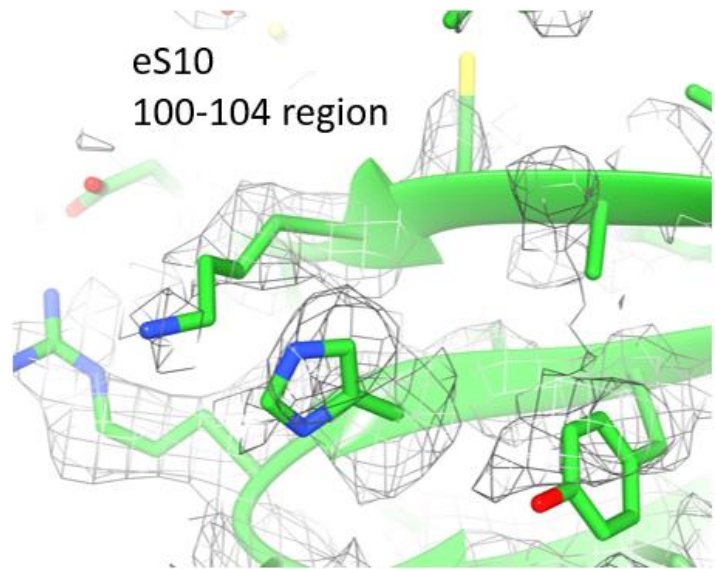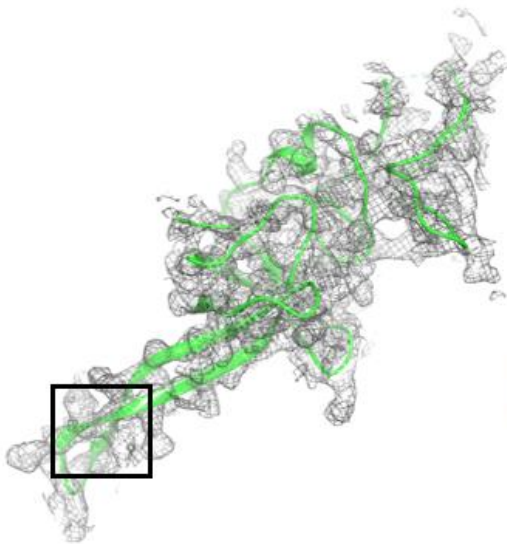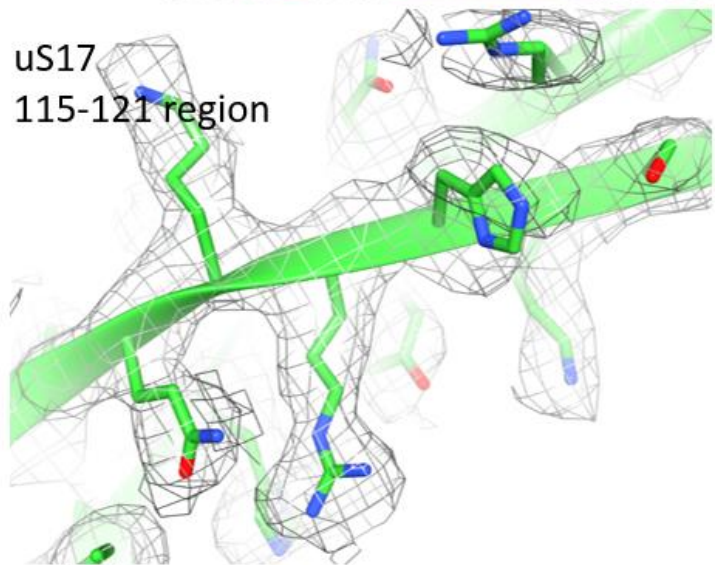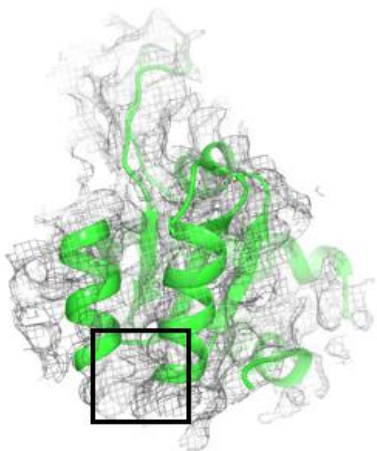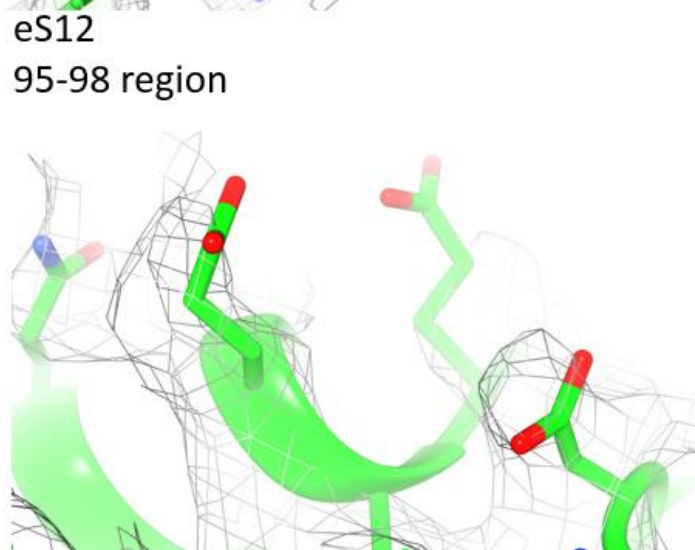

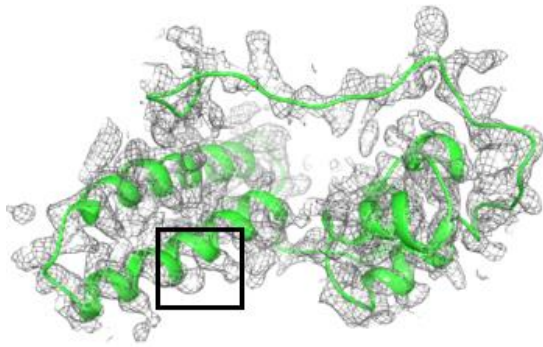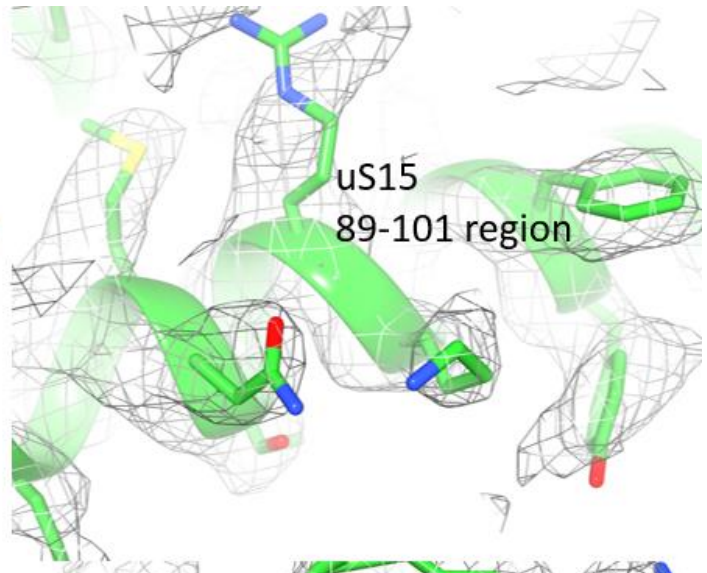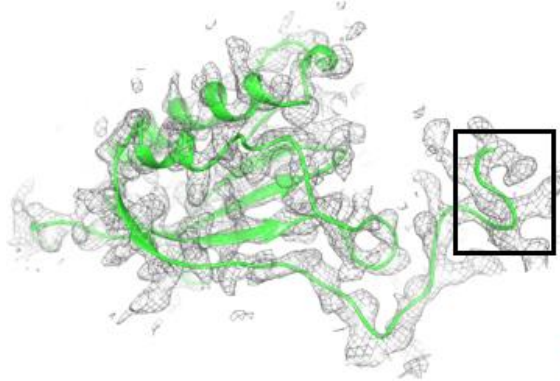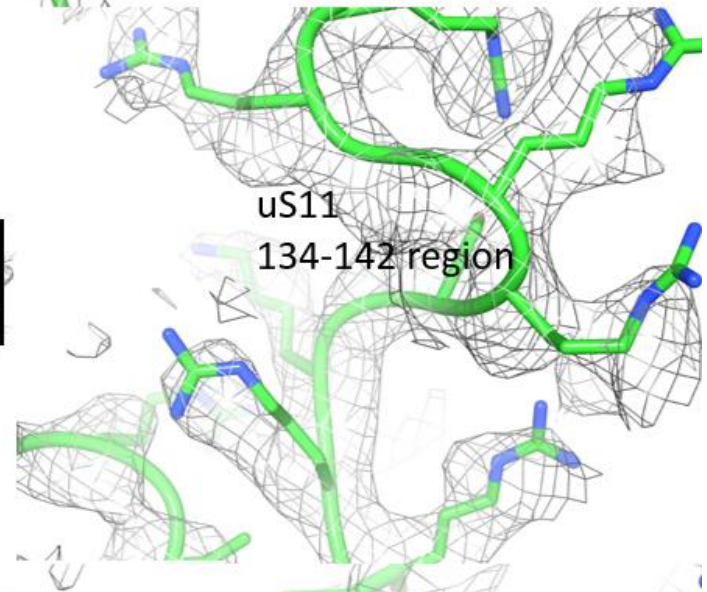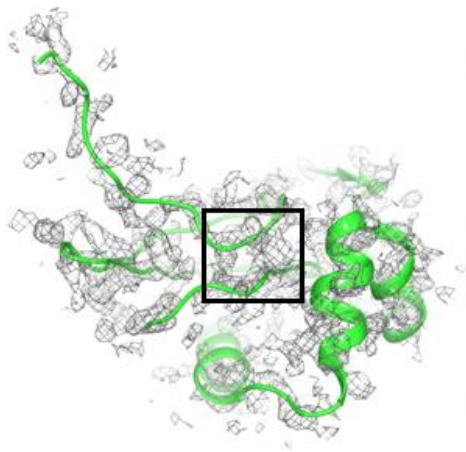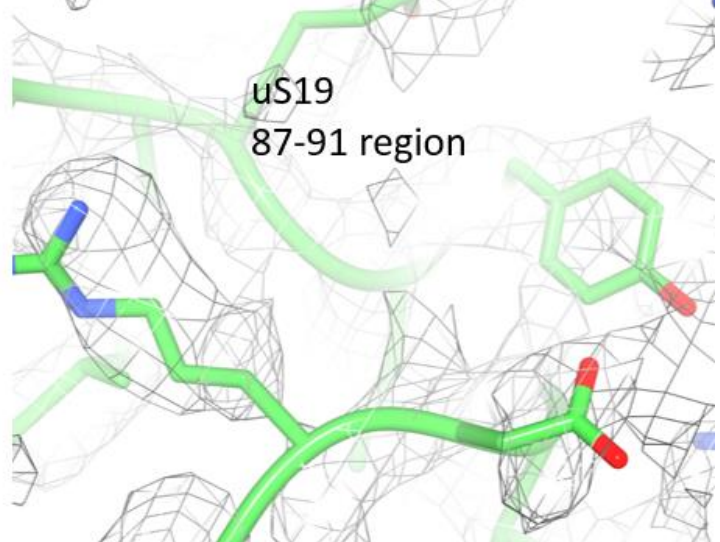

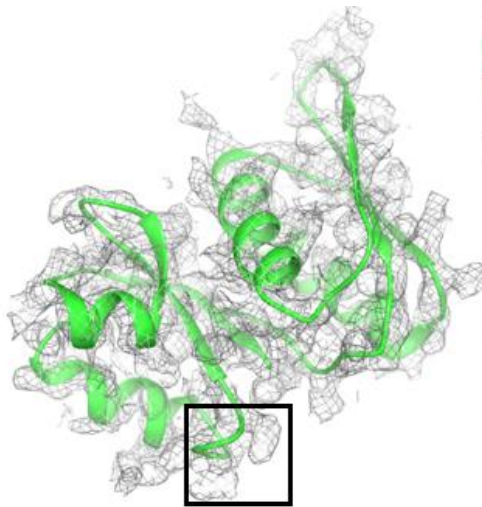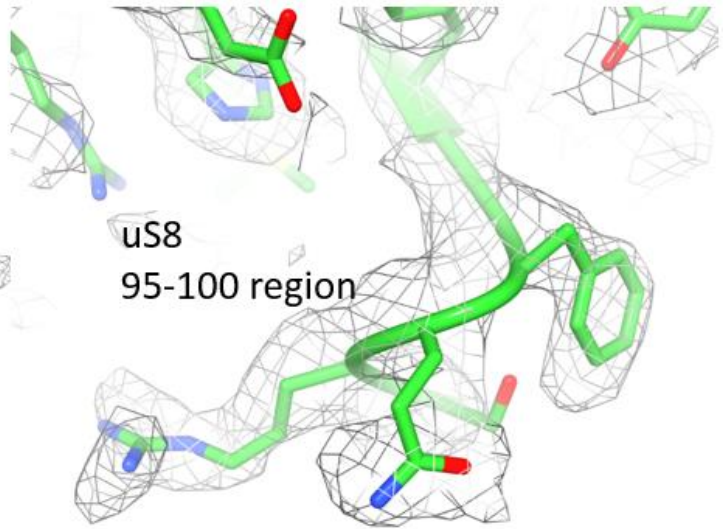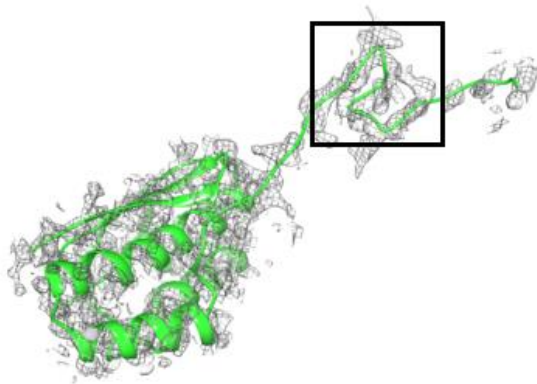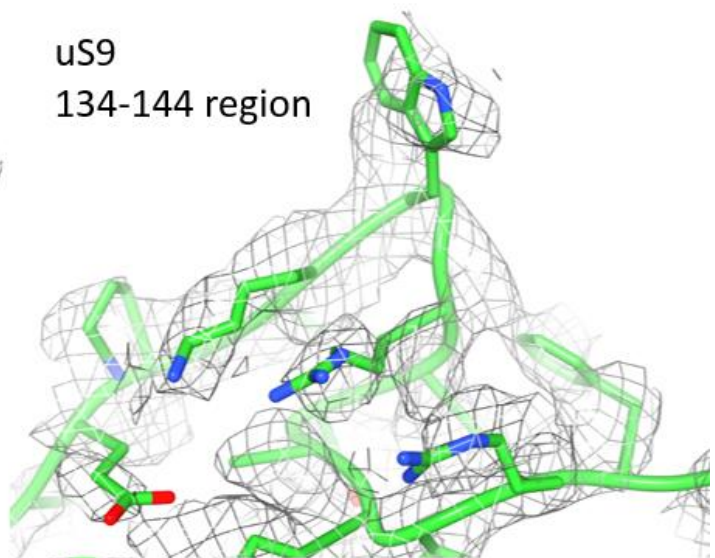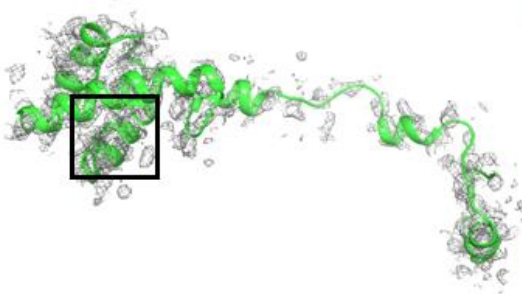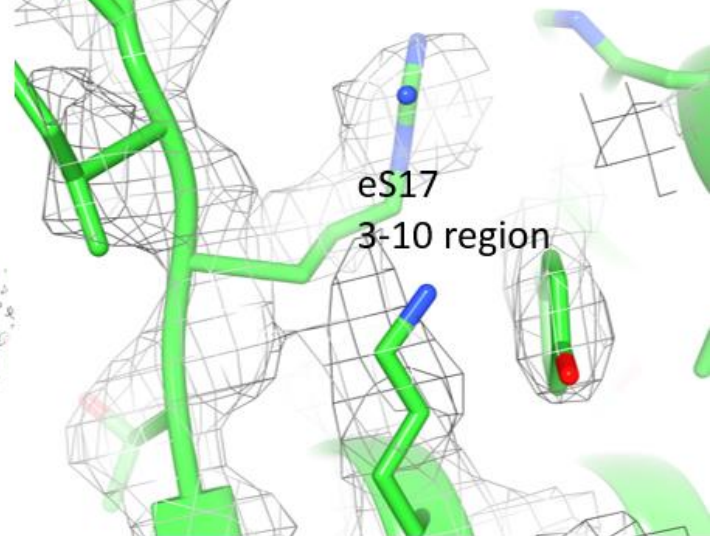

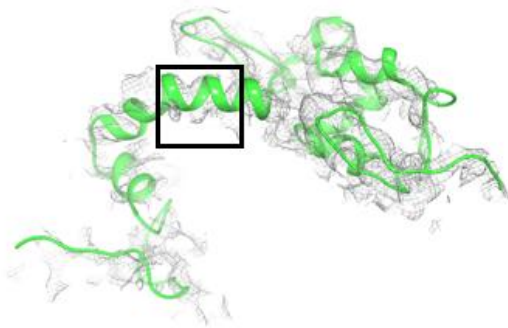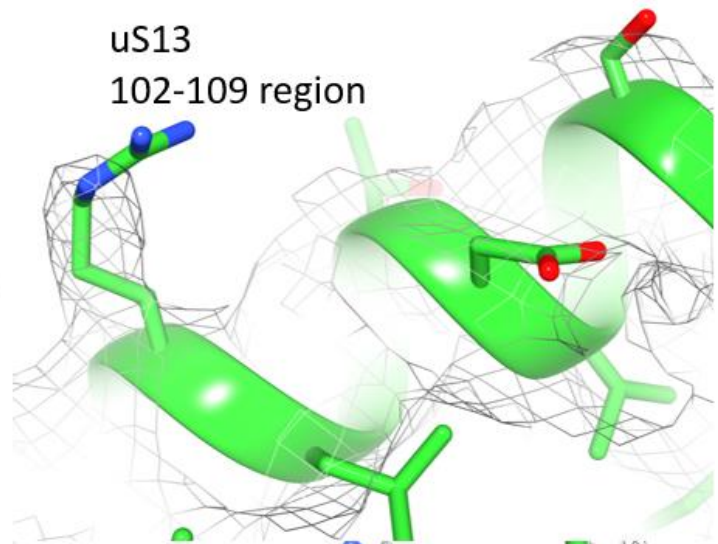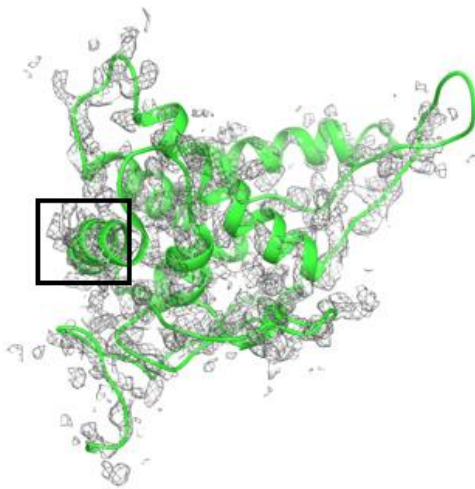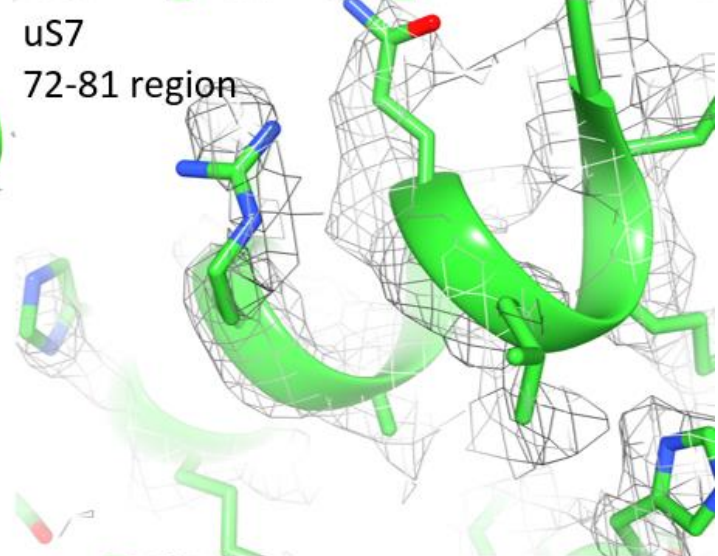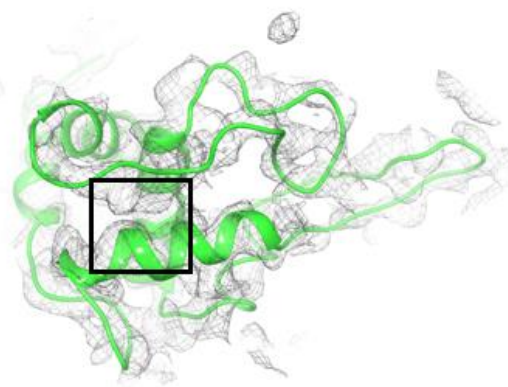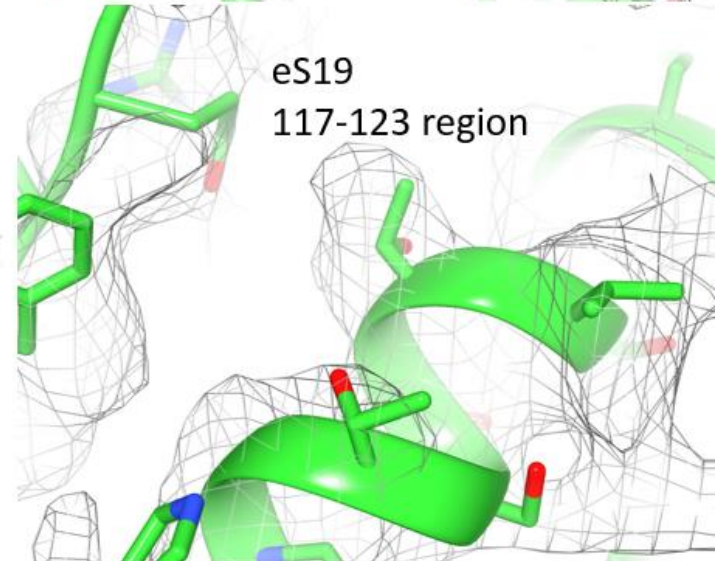



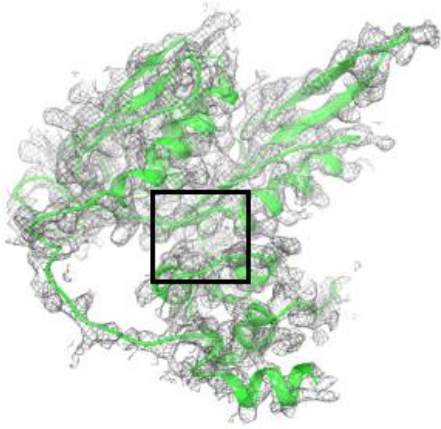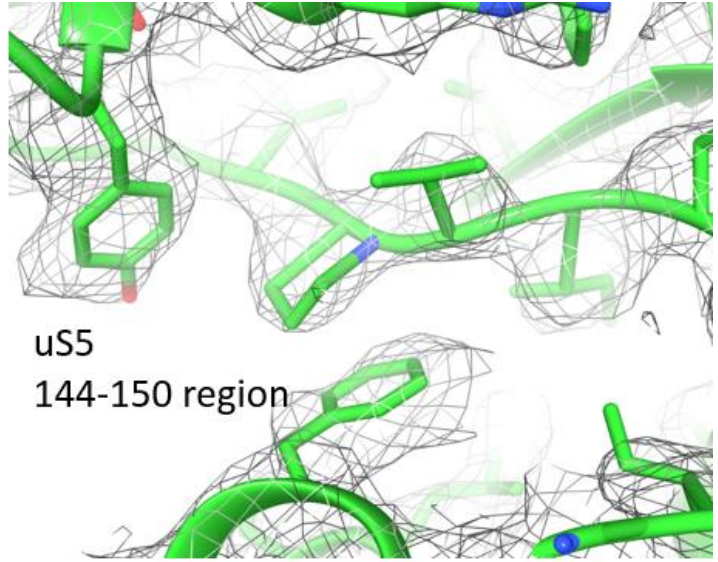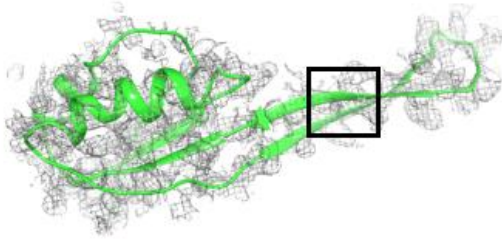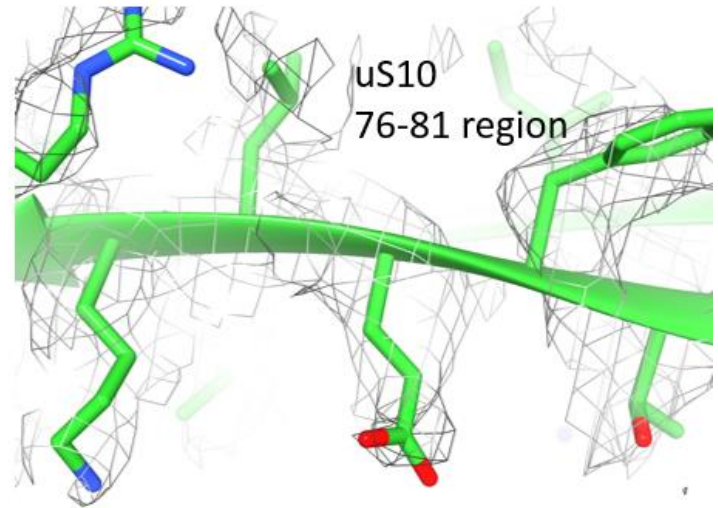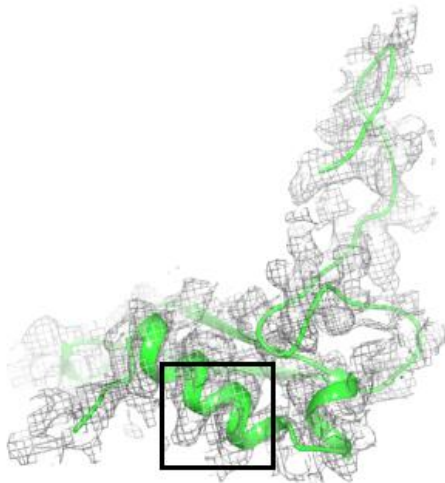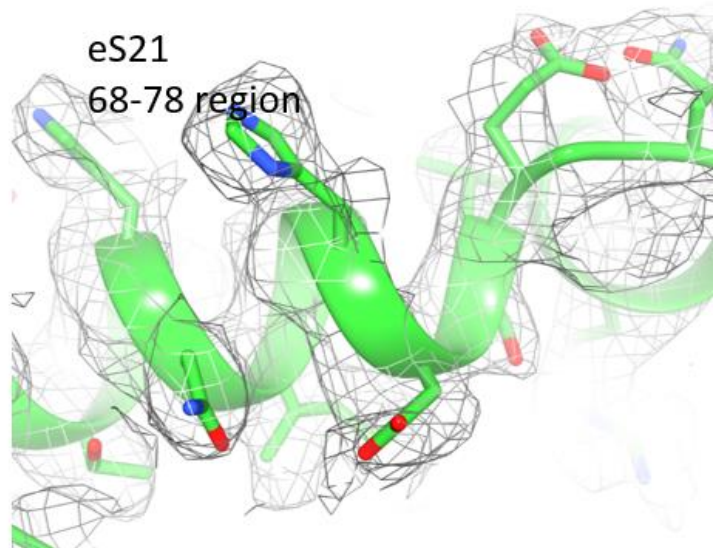

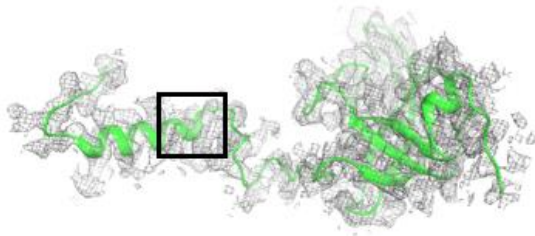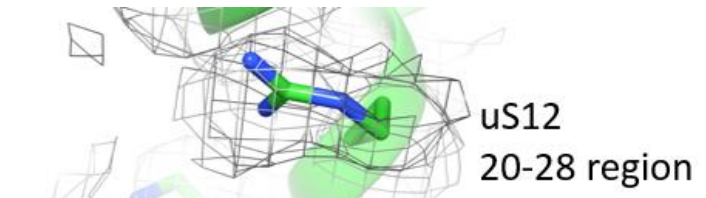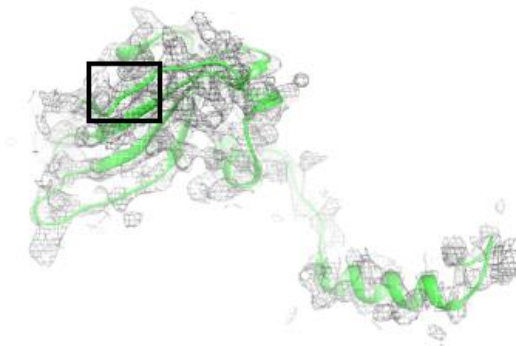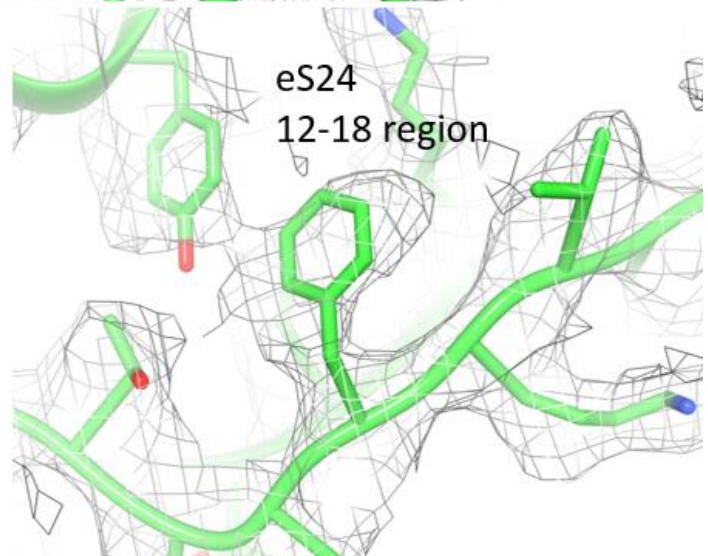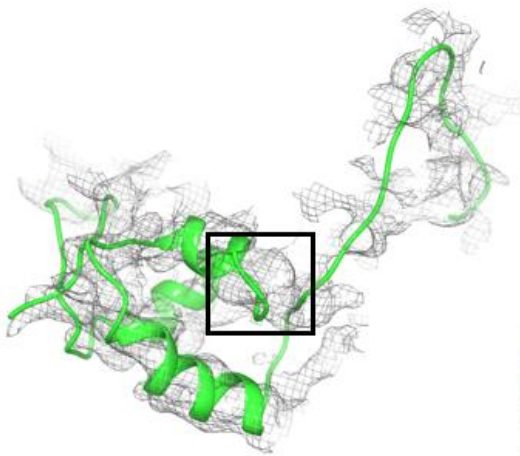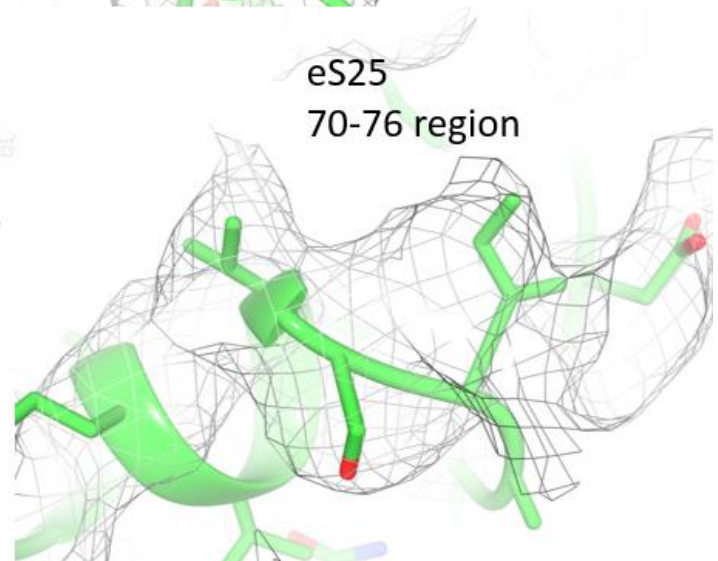

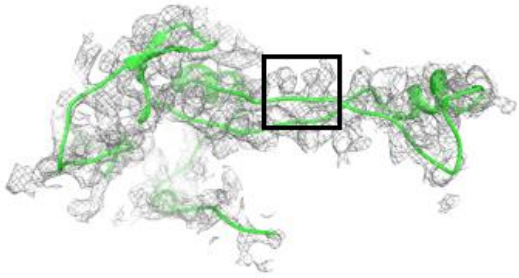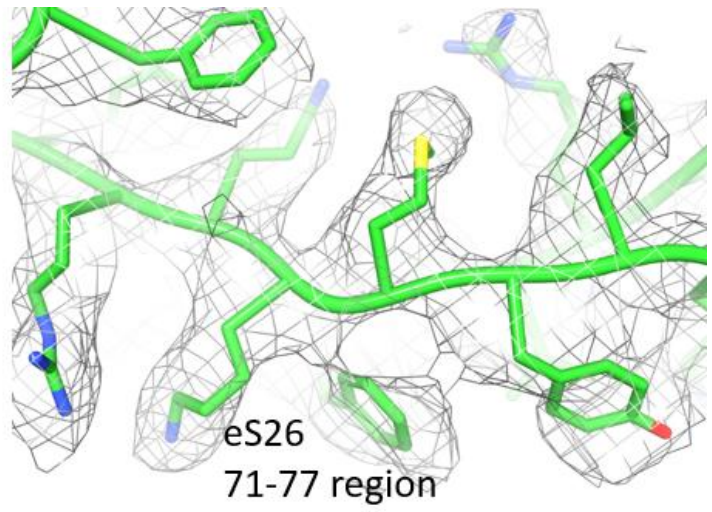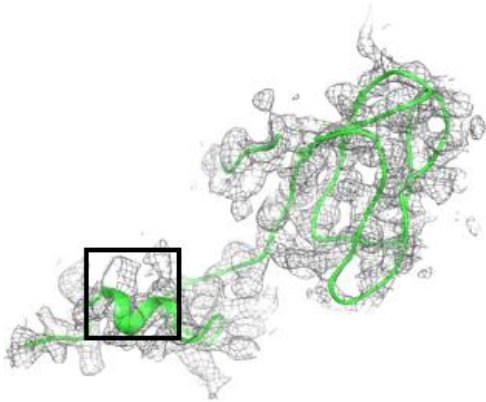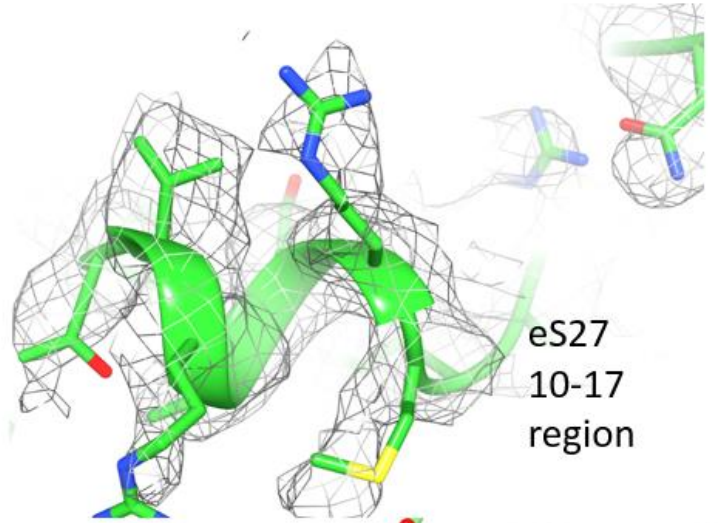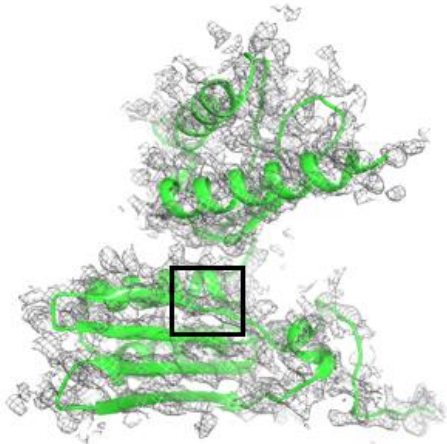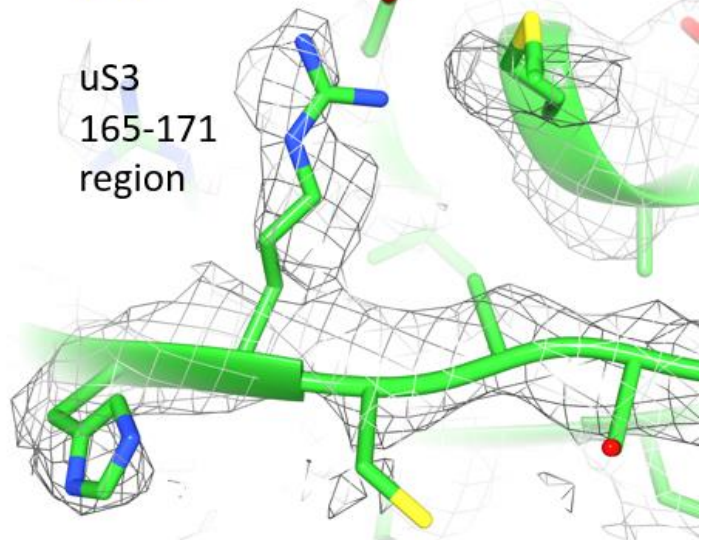

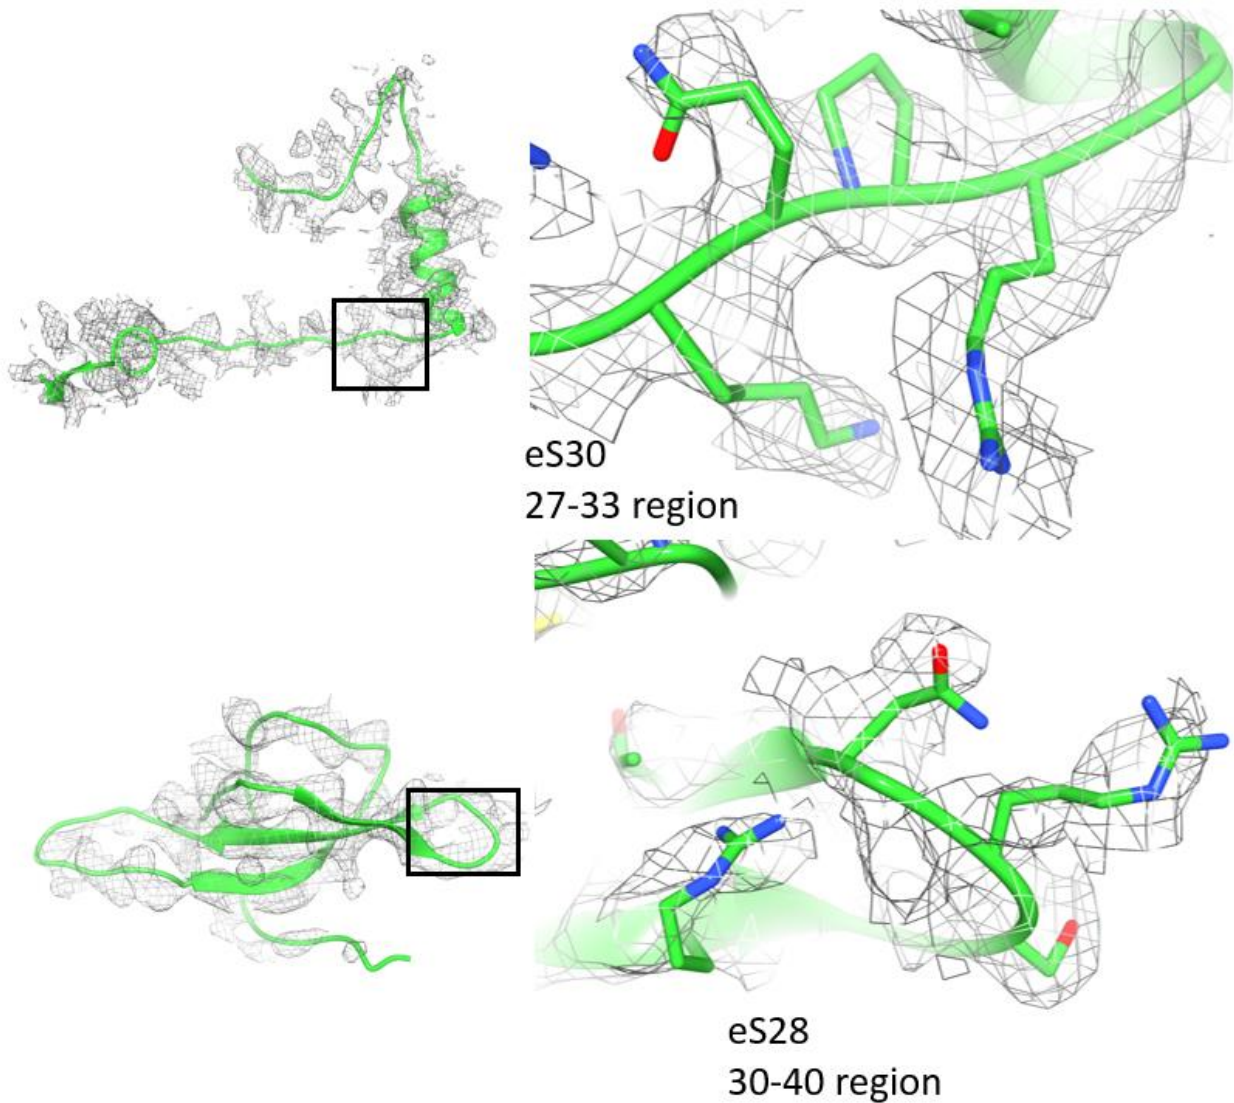

**Supplementary Figure 4: Density fits of modeled SSU proteins and selected regions showcasing high-resolution features.** Locations of selected regions on the protein are indicated by a black box and correspond to the high-resolution features displayed adjacent to the protein. Region numberings correspond to amino acid sequence.

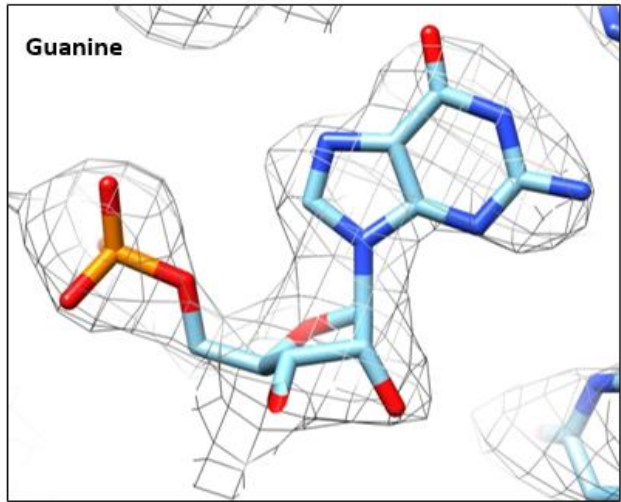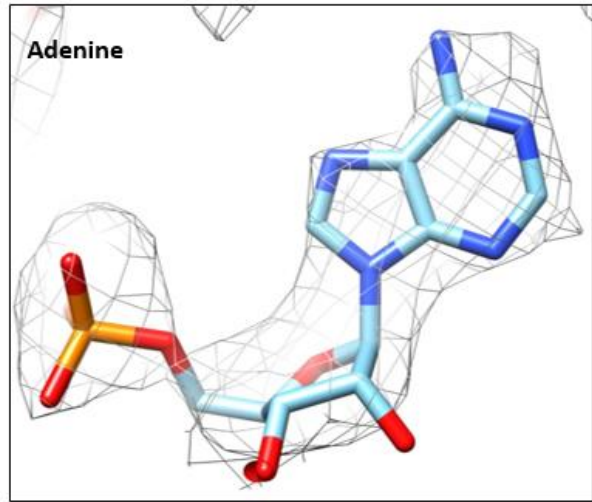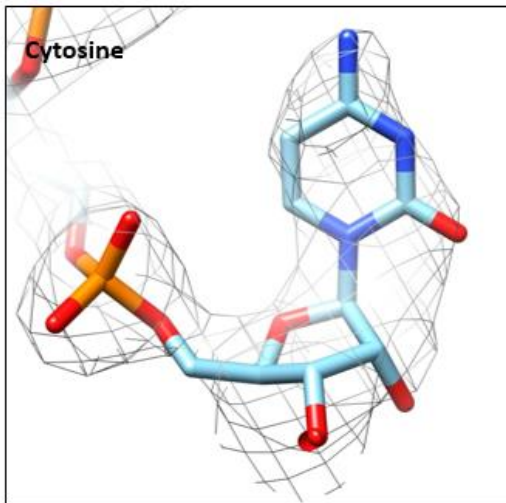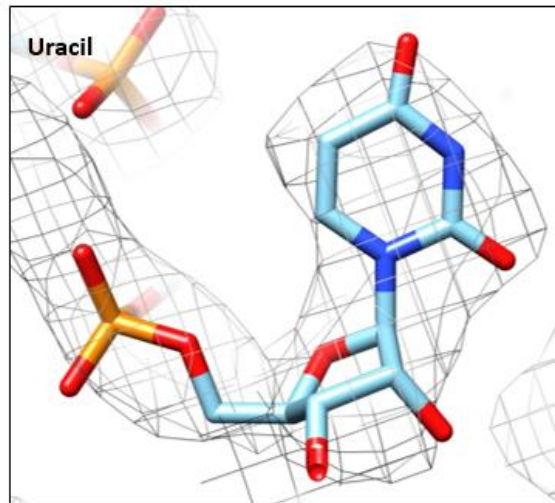

**Supplementary Figure 5: Density of rRNA showcasing identification of individual nucleotides in the ribosome of *L. donovani*.**

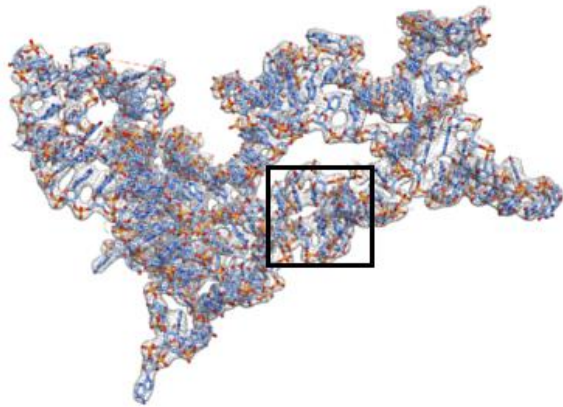

srRNA1  
40-45 region

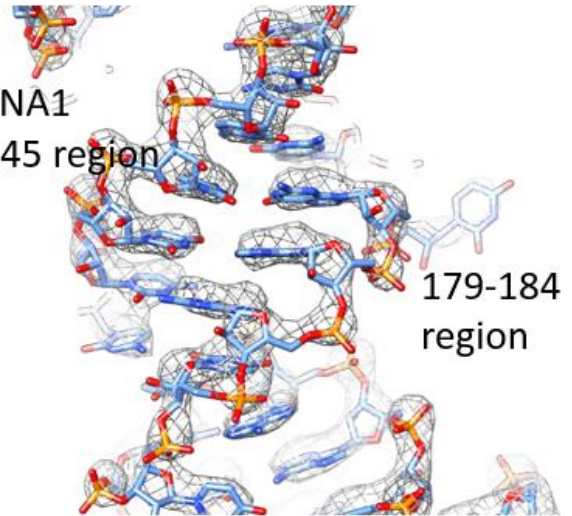

179-184  
region

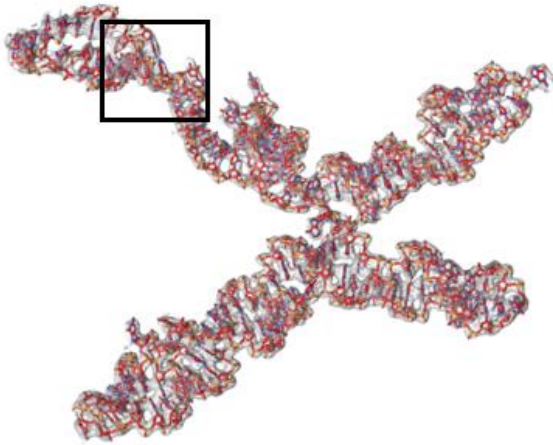

srRNA2  
4-7 region

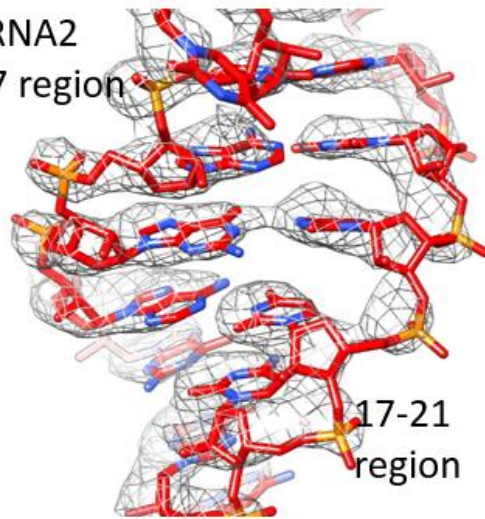

17-21  
region

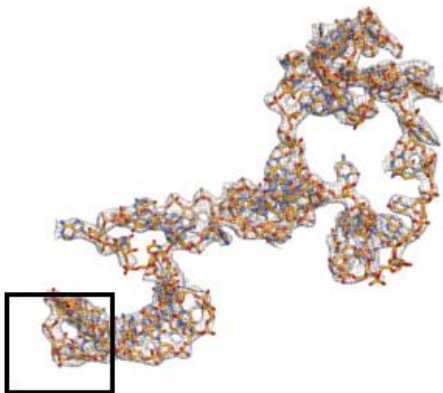

srRNA3  
27-36 region

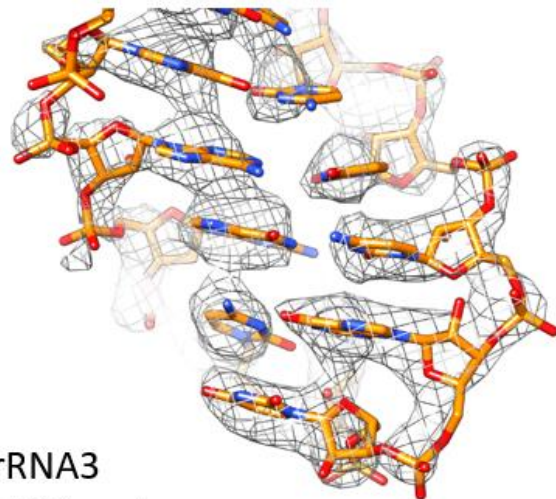

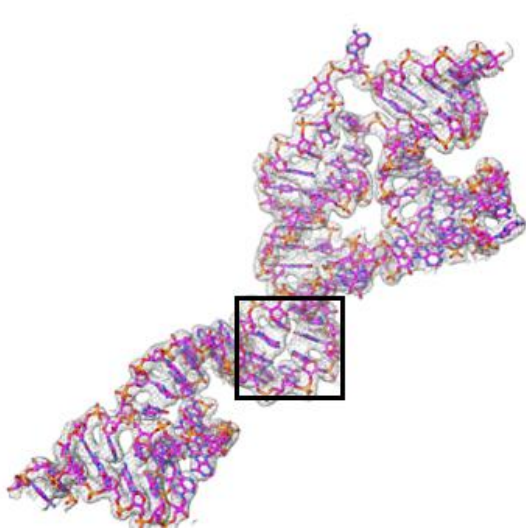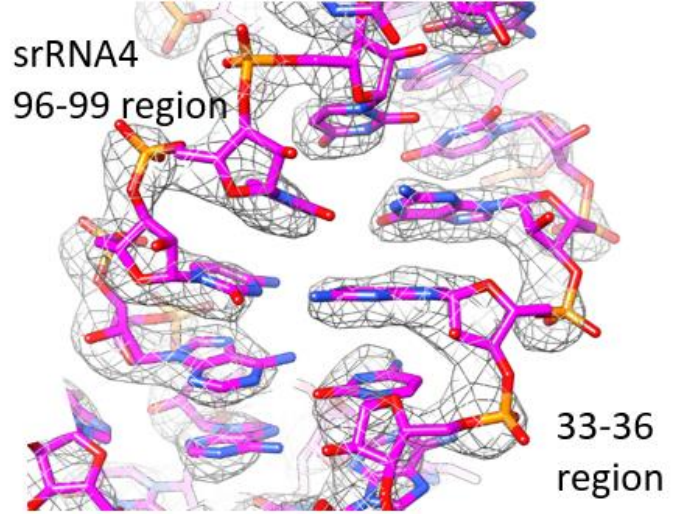

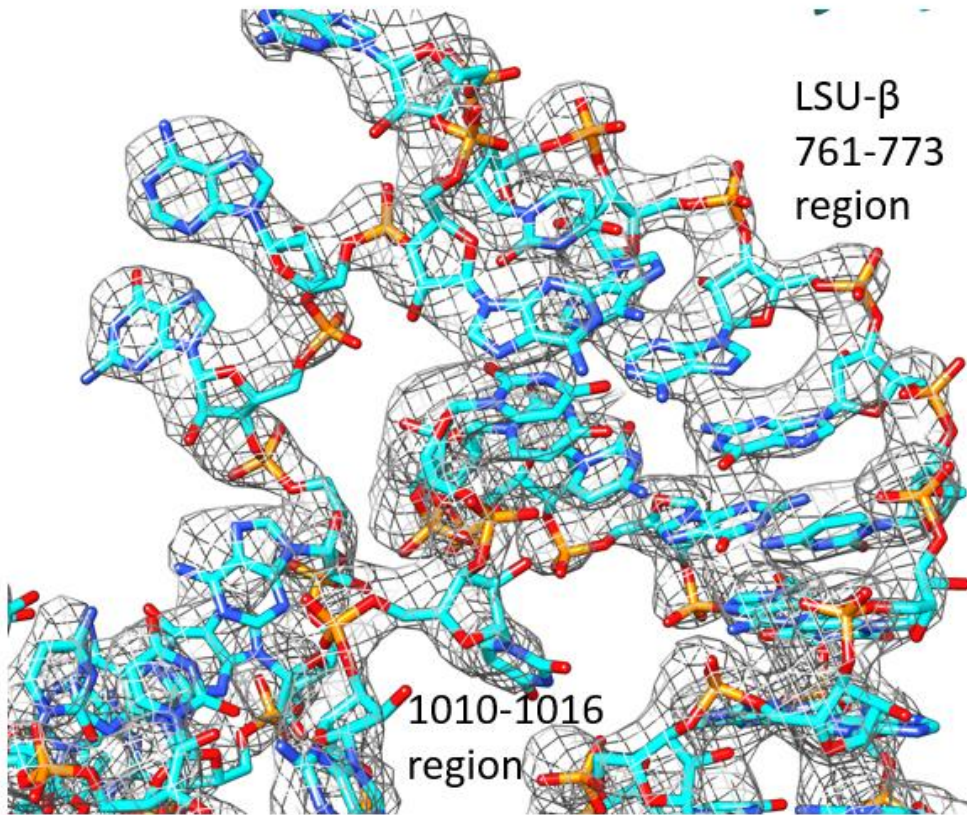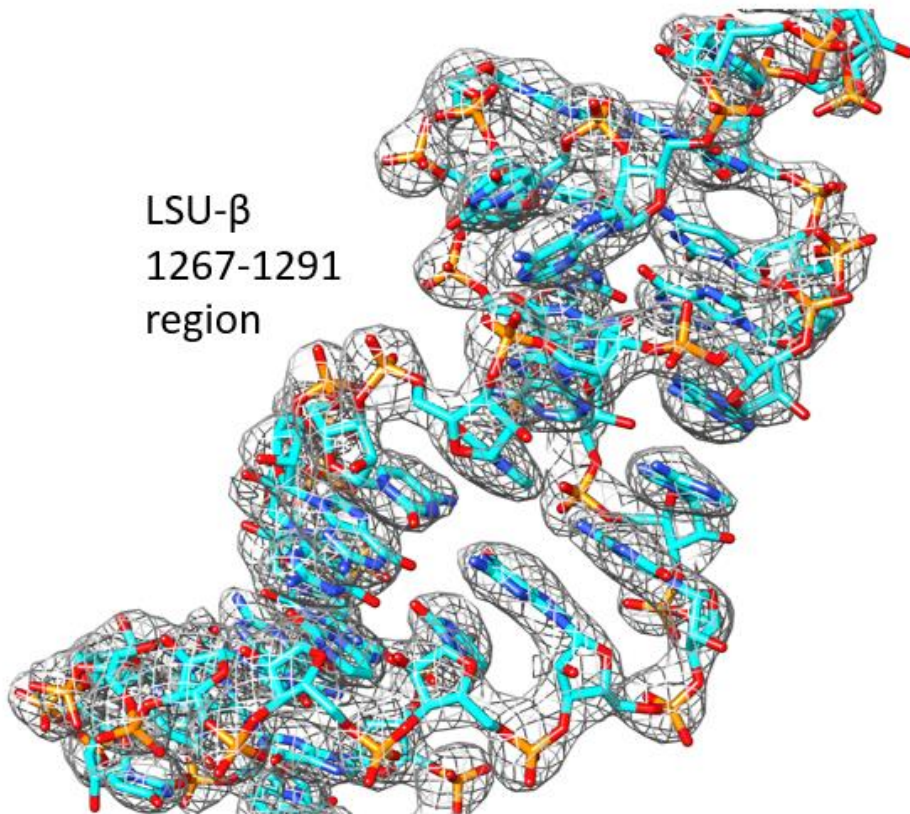



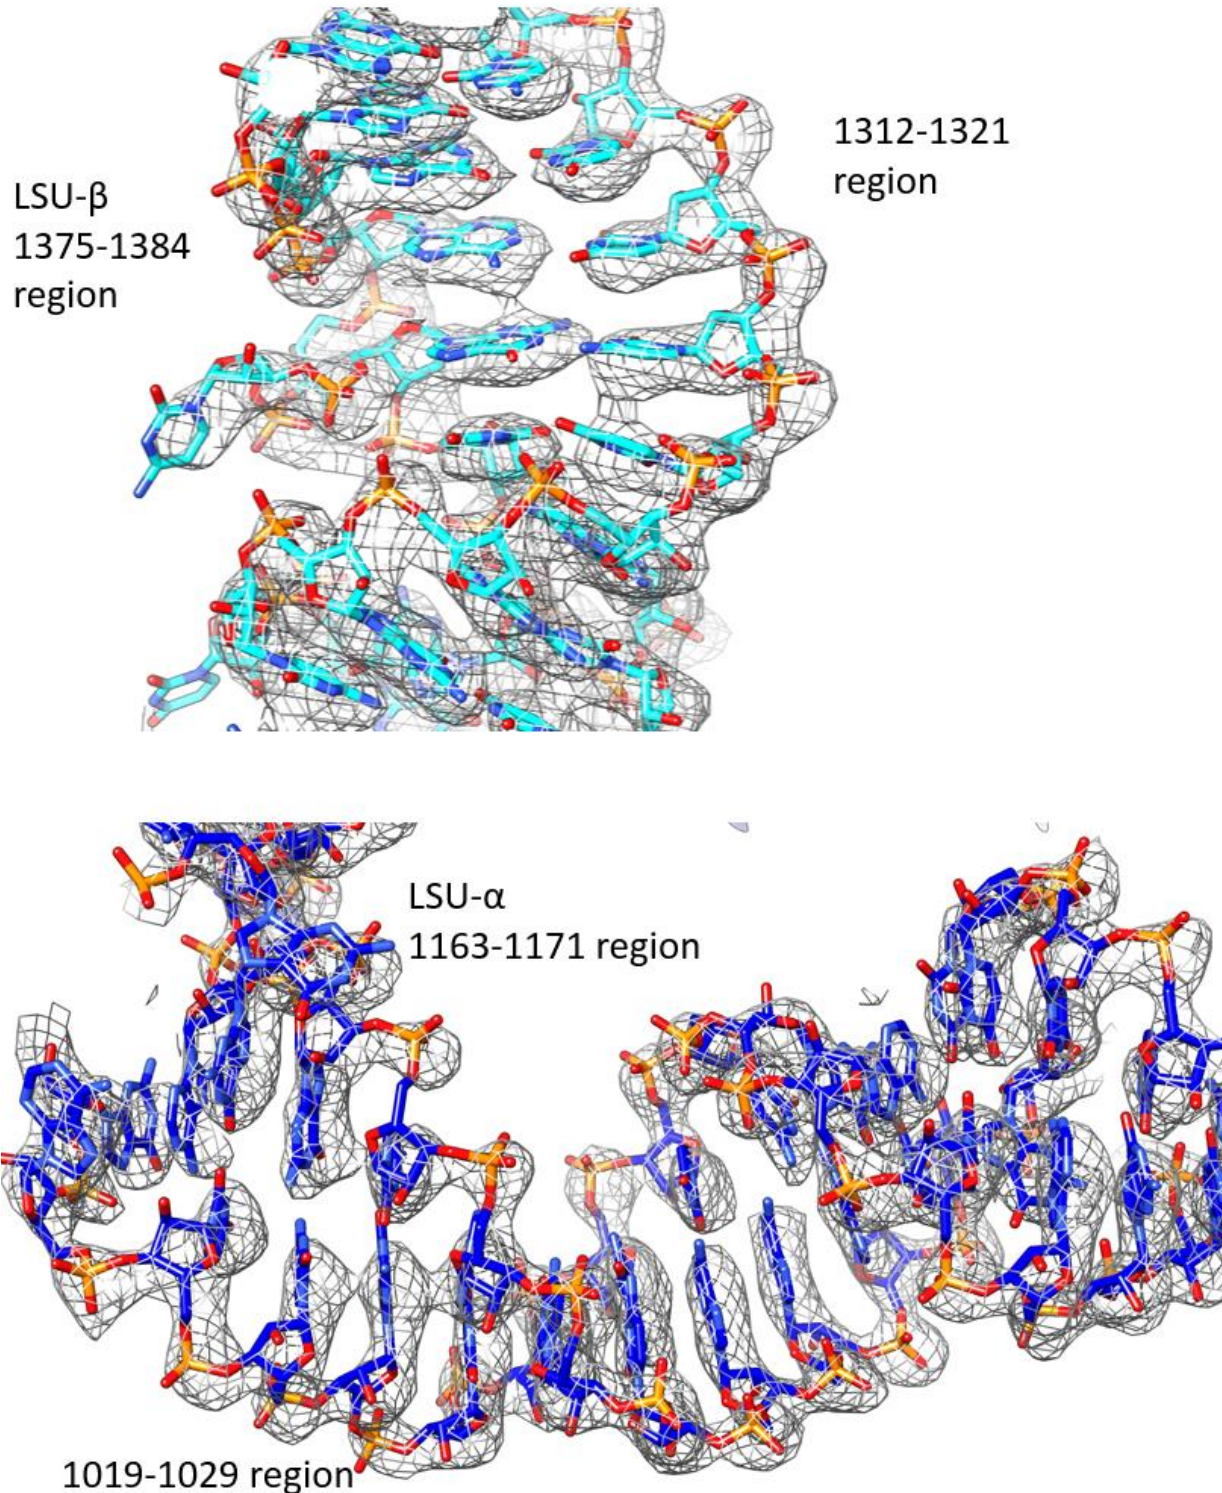

**Supplementary Figure 6: Density fits of LSU trypanosomal-unique rRNAs with selected regions showcasing high-resolution features.** Locations of selected regions on the rRNA are indicated by a black box and correspond to the high-resolution features displayed adjacent to the srRNA. Selected LSU-β and LSU-α densities shown also. Region numberings correspond to nucleotide sequence.

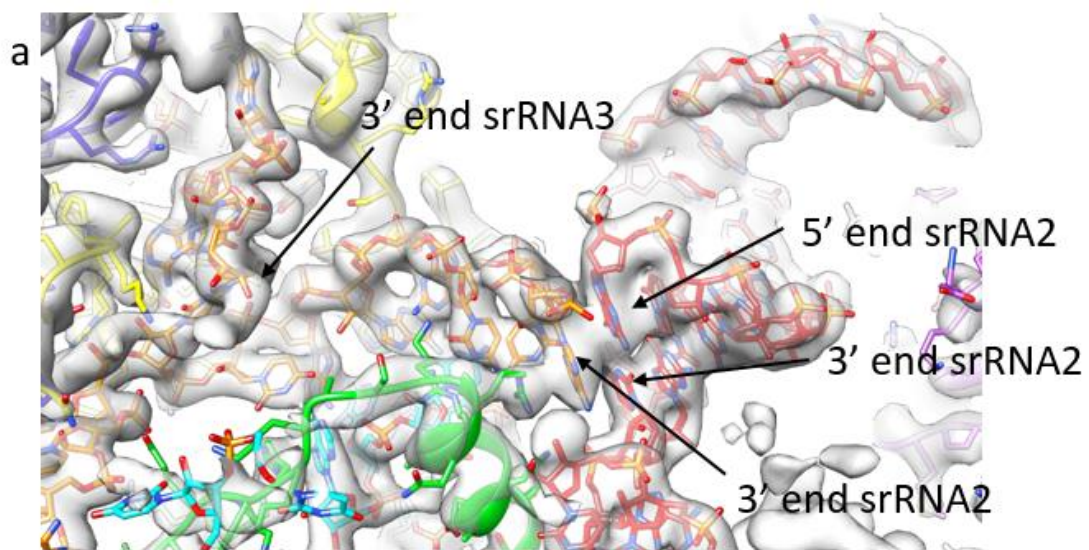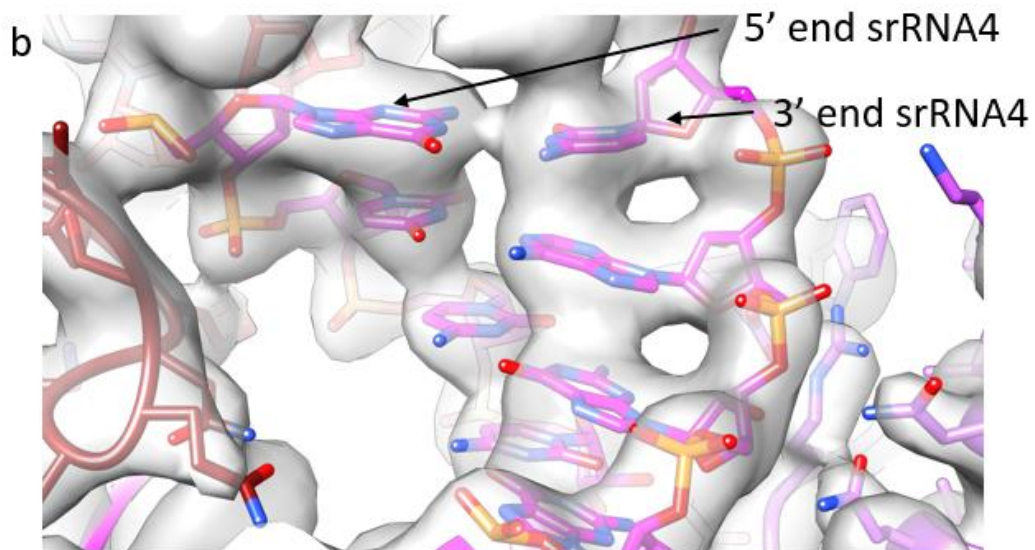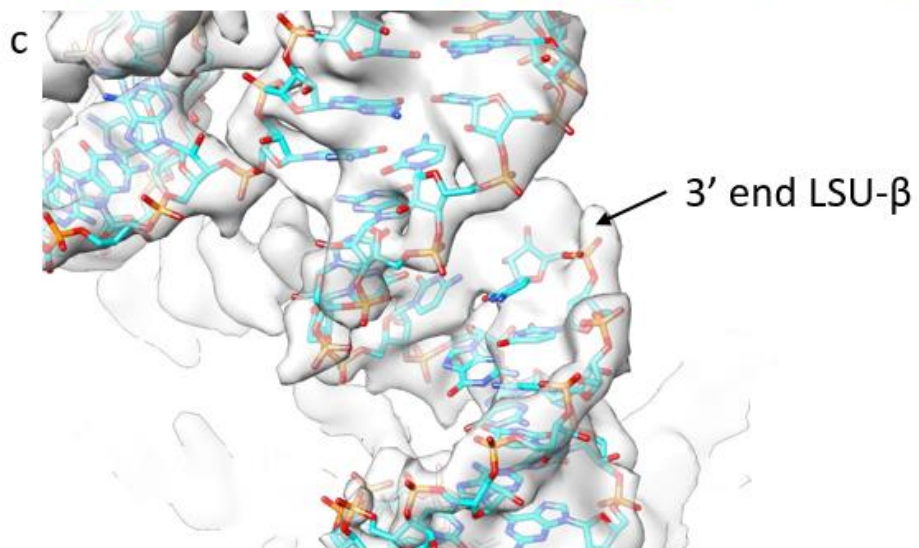

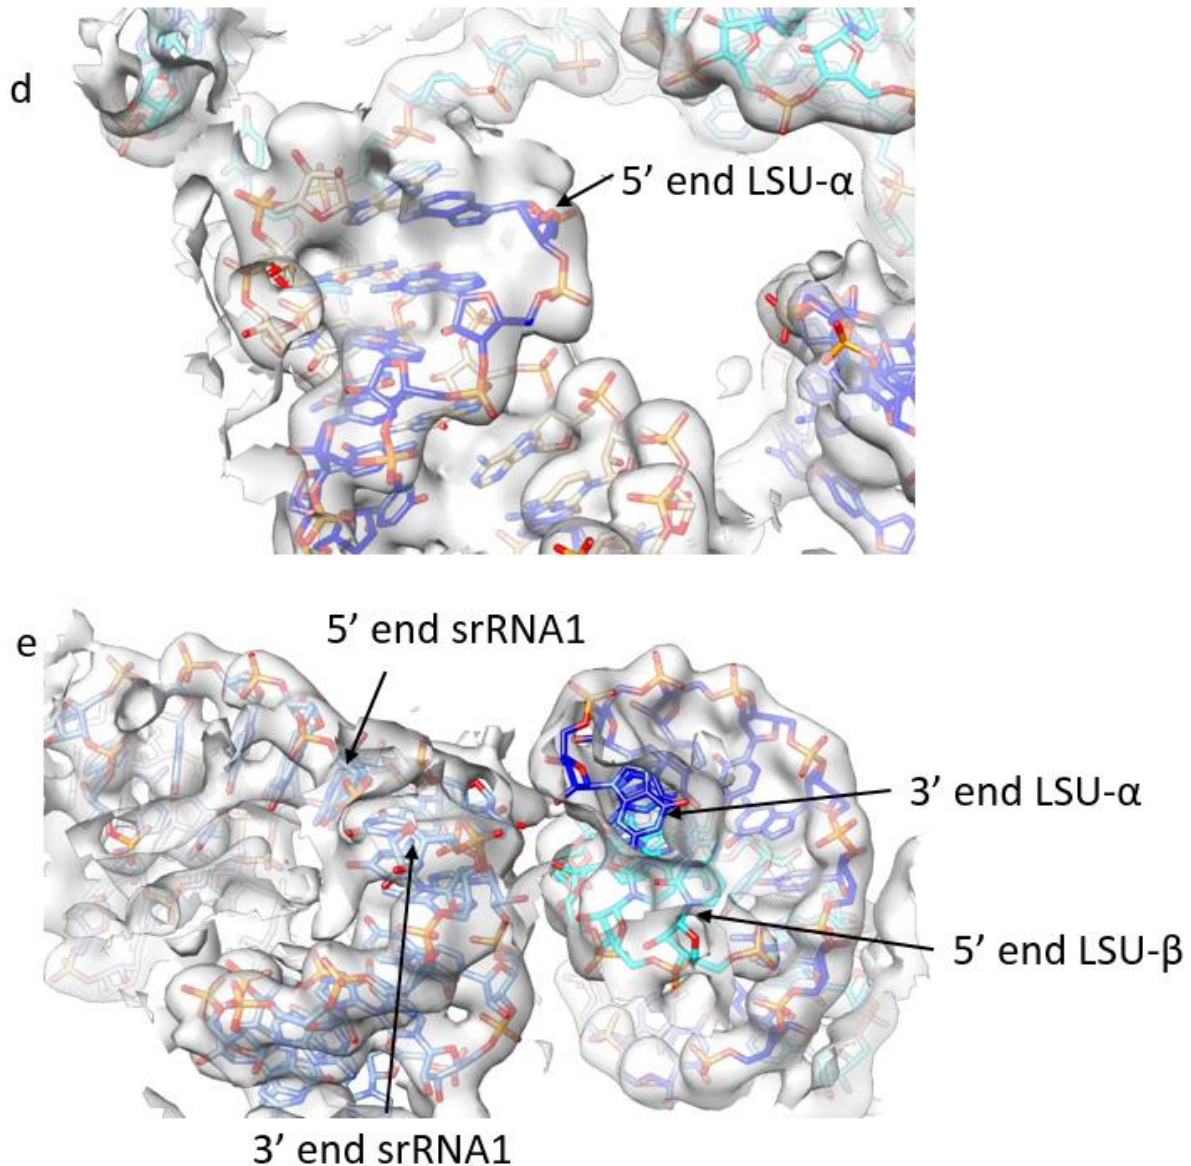

**Supplementary Figure 7: Full model with density highlighting various rRNA components in *L. donovani*.** (a) Region surrounding both ends of srRNA2 and srRNA3. (b) Region surrounding both ends of srRNA4. (c) Region surrounding the 3' end of LSU-β. (d) Region surrounding the 5' end of LSU-α (e) Region surrounding both ends of srRNA1, the 5' end of LSU-β, and the 3' end LSU-α.

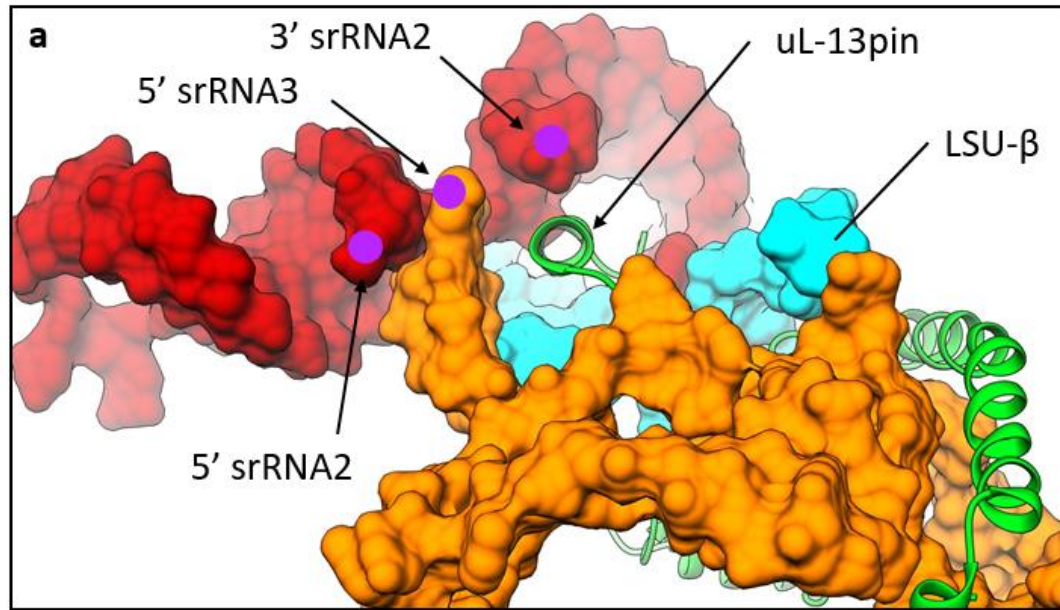

Homolog of  
28S 3' end

Homolog of  
28S 5' end

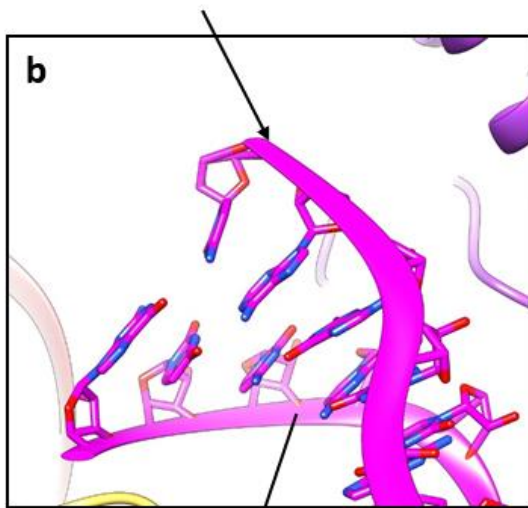

srRNA4

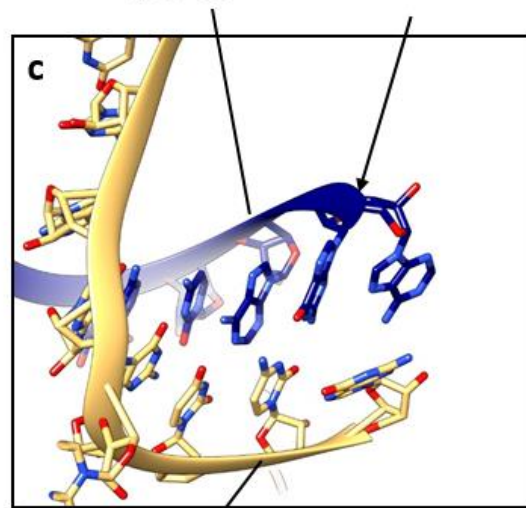

5.8S rRNA

**Supplementary Figure 8: View of uL13-pin and rRNA pinned ends as compared to basepair stabilized rRNA ends.** (a) Three sided binding pocket formed by srRNA2(red), srRNA3(orange), and LSU-β(cyan) of uL-13pin(green). rRNA fragment ends are highlighted by magenta circles. KSD is hidden for clarity. (b-c) Basepair stabilization of the 5' and 3' LSU rRNA ends homologous to the ends of 28S rRNA in non-trypanosomal ribosomes.

*Leishmania donovani*

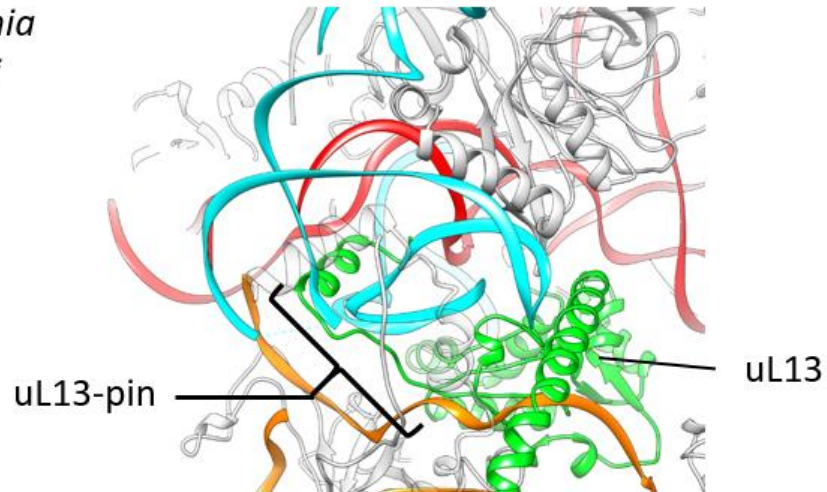

*H. sapiens*

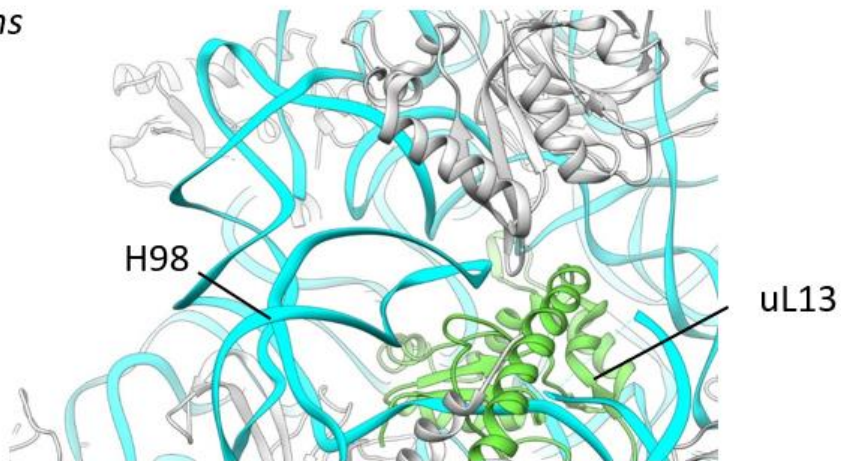

*T. brucei*

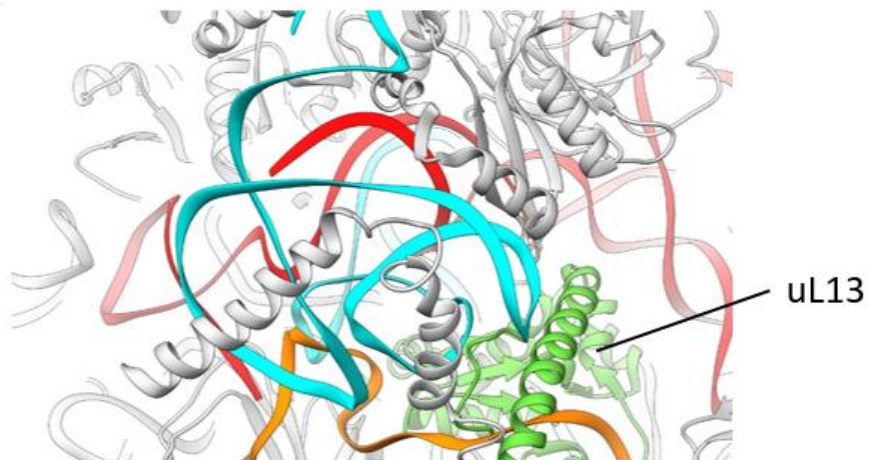

**Supplementary Figure 9: Comparison of the uL13-pin region between *L. donovani*, human, and *T. brucei* ribosomes.**

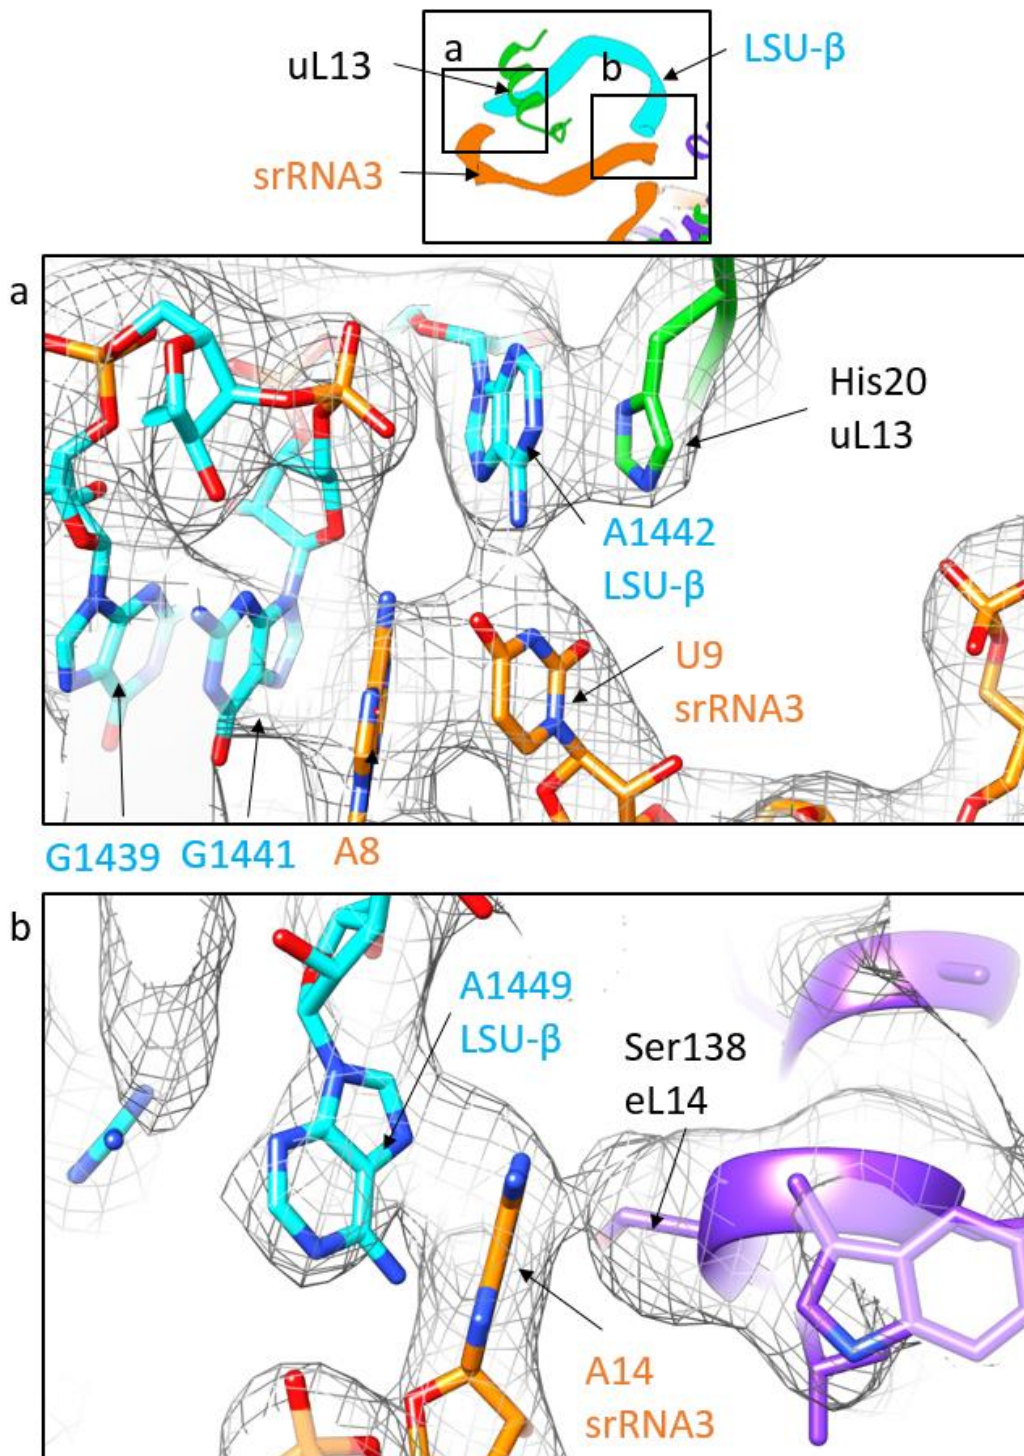

**Supplementary Figure 10: rRNA ring formation details.** Schematic of the ring formed by LSU-β (cyan) and srRNA3 (orange) through interactions with uL13 and eL14. (a) Multiple stacking interactions between bases of LSU-β and srRNA3, and A1442 of LSU-β and His20 of uL13 along with an interaction between A1442 of LSU-β and U9 of srRNA3 closing the other side of the rRNA ring shown in Fig. 6b. (b) LSU-B and srRNA3 interacting with eL14 to close one side of the rRNA ring shown in Fig. 6b.

a

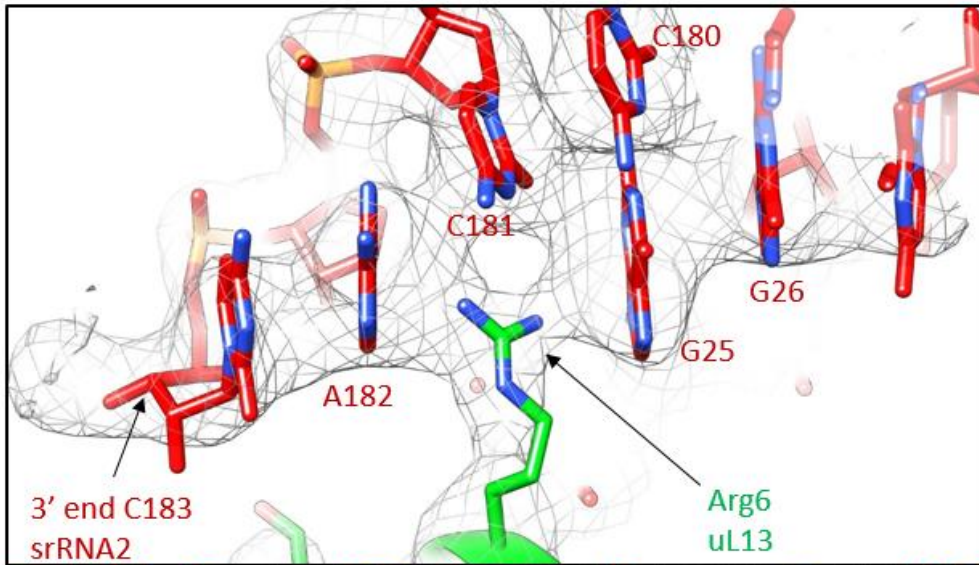

b

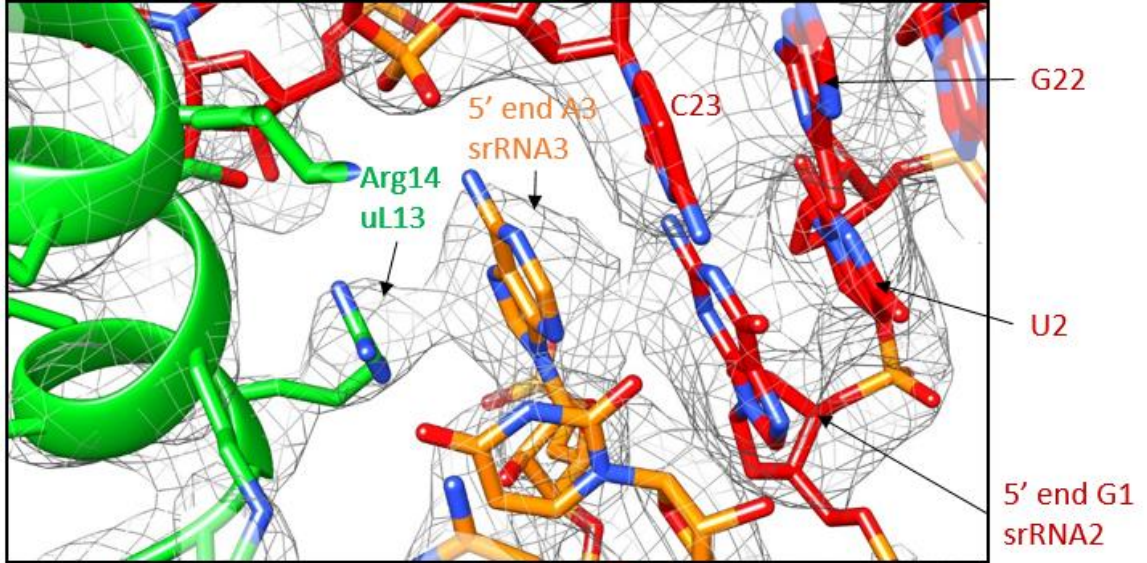

c

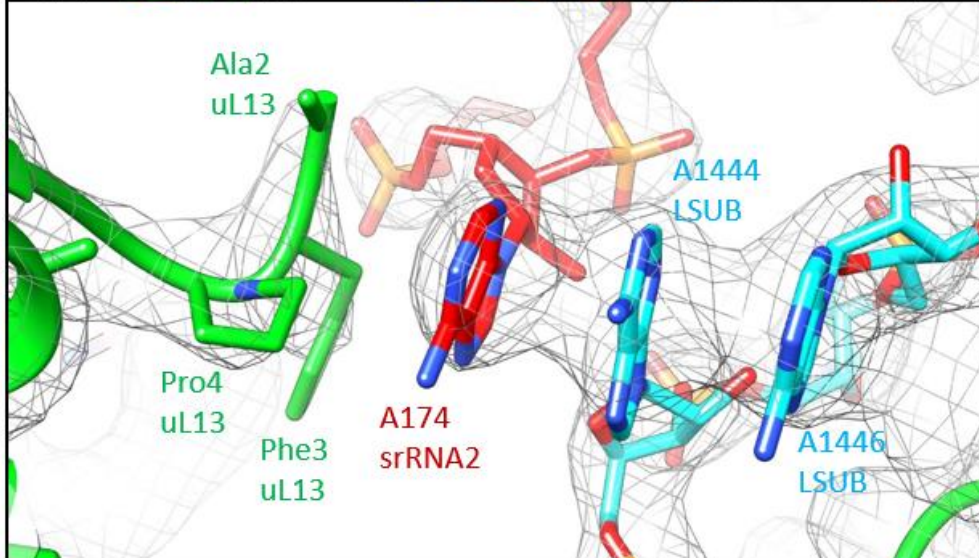

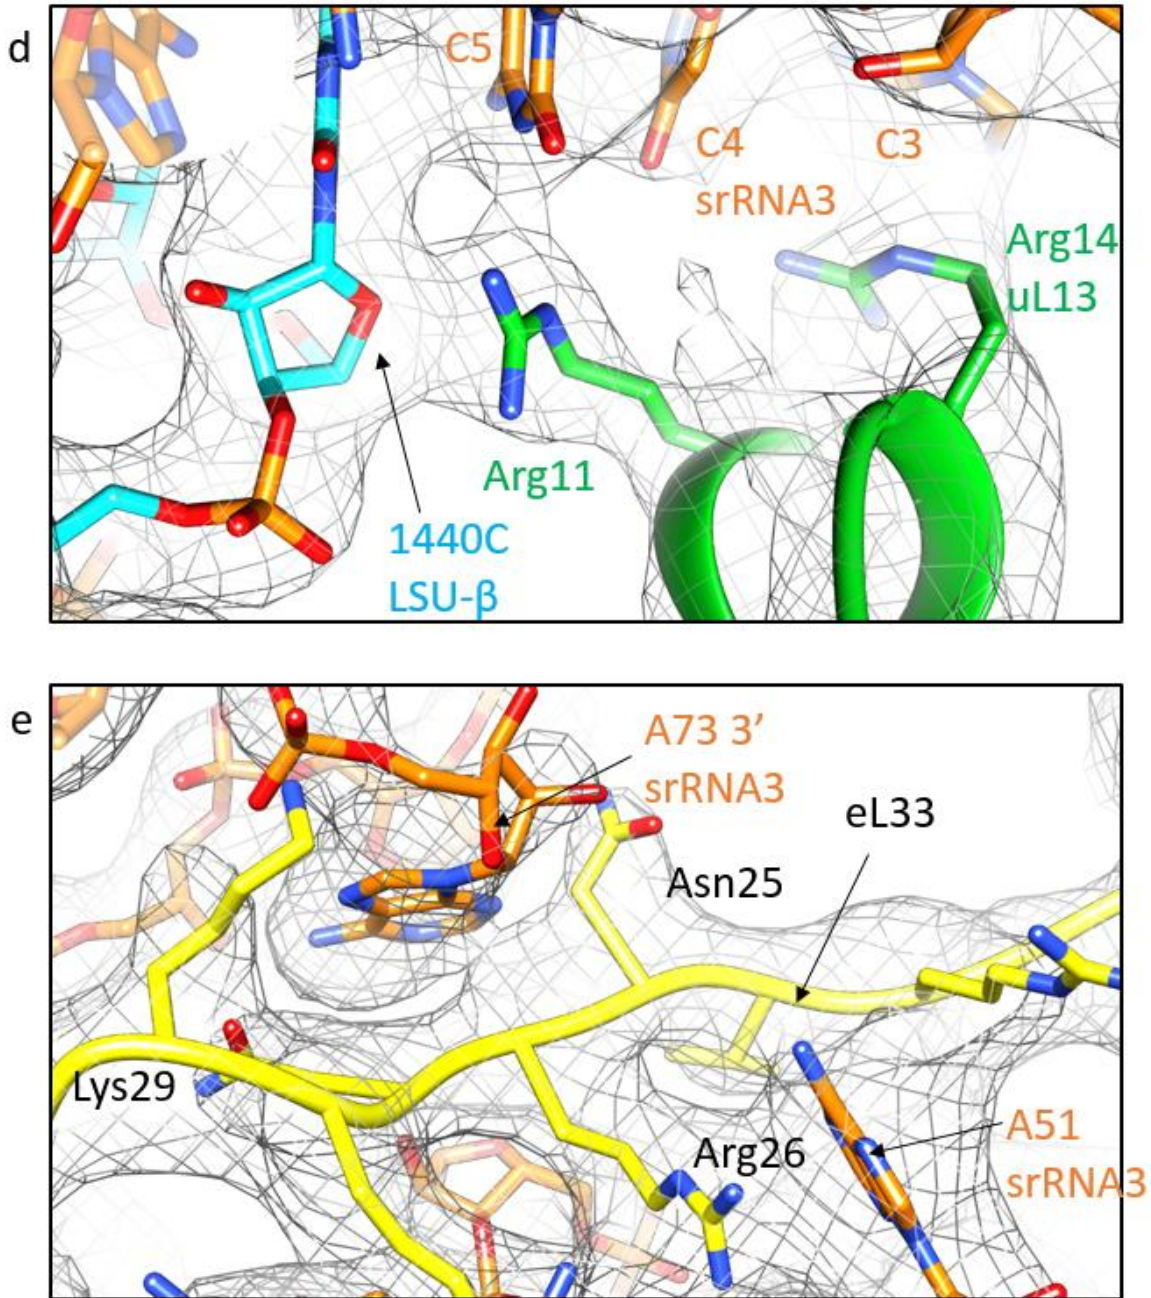

**Supplementary Figure 11: Full models with density of selected interactions**

**corresponding to regions from Figure 5.** (a) Interaction of Arg6 of uL13 binding the 3' end of srRNA2. (b) Sandwiching interaction involving Arg14 of uL13 and the 5' end of srRNA2, G1, stacking with the 5' end of srRNA3, A3. (c) Stacking between A174 of srRNA2 and A1444 and A1446 near the N-terminus of uL13. (d) Arg11 of uL13 binding C5 of srRNA3 and 1440C of LSU-β. (e) Backbone of eL33 between Asn25 and Arg26 binding the 3' end of srRNA3, A73. Side chain of Arg26 binding A51 of srRNA3.



- *Leishmania donovani*
- *H. sapiens*

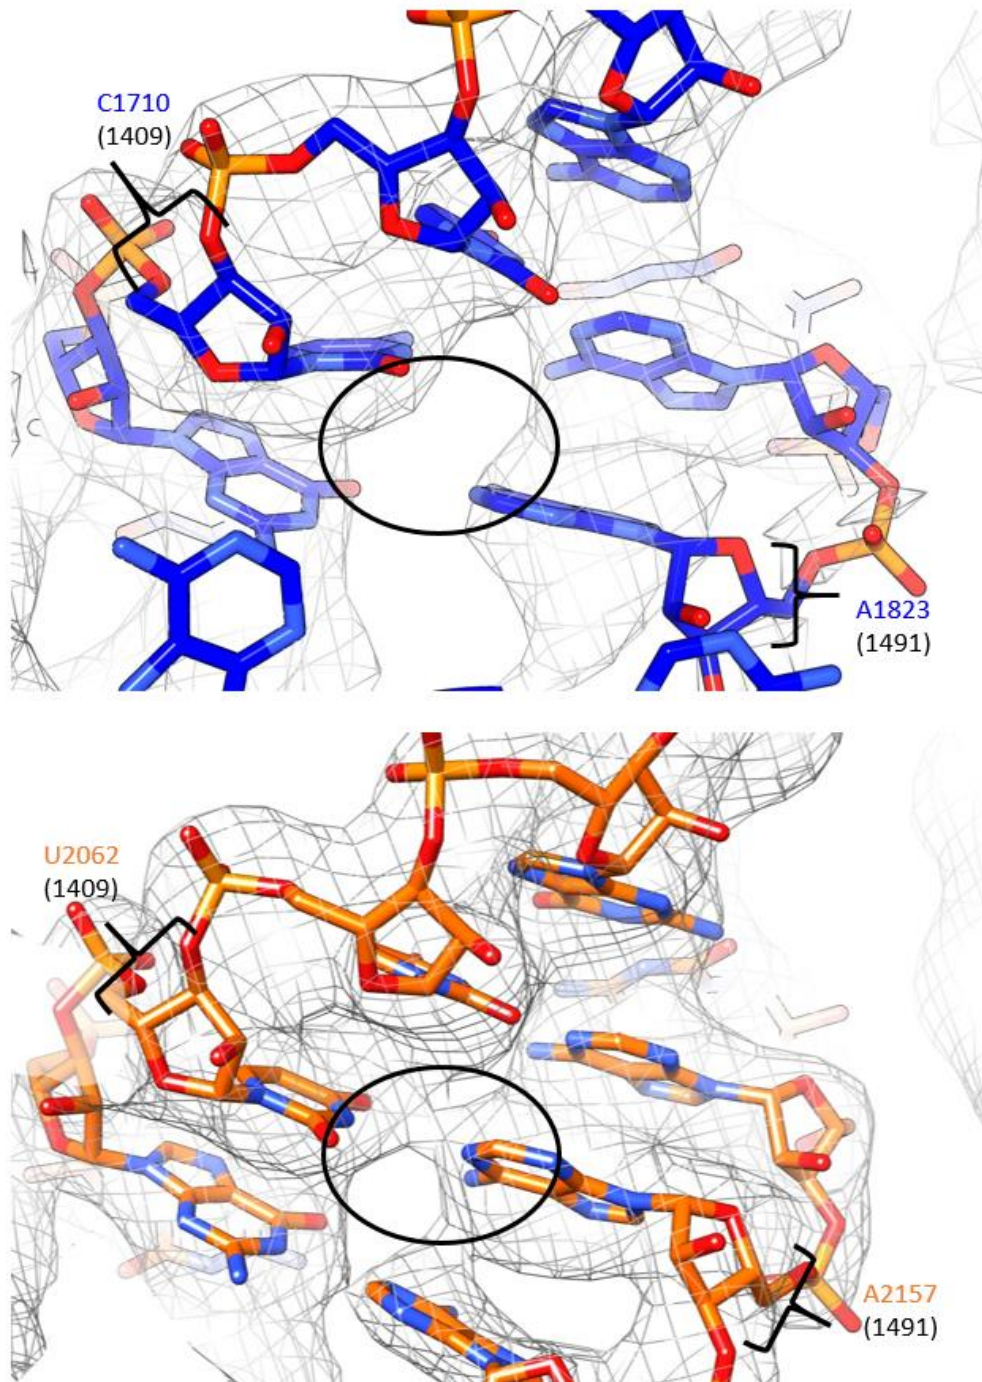

**Supplementary Figure 12: Comparison of the 1409-1491 basepair in *L. donovani* and human ribosomes.** Local resolution in the human structure is  $<3.5\text{\AA}$ . Local resolution in the *L. donovani* structure is  $<3\text{\AA}$ .

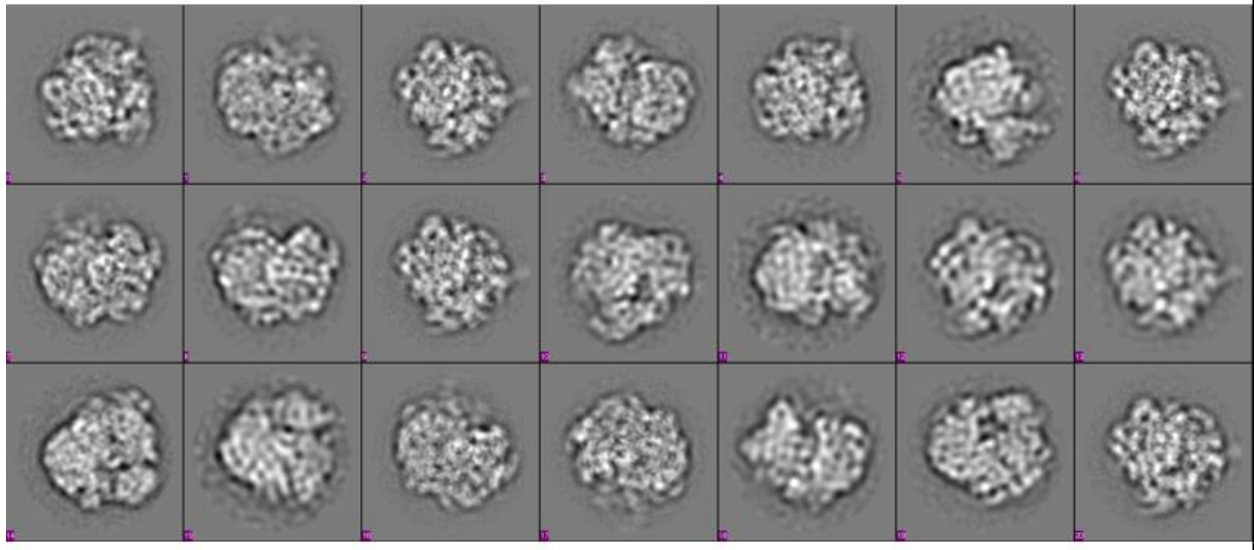

Supplementary Figure 13: Sample Class2D classes of the *L. donovani* ribosome.

### Supplementary Table 1. Statistics of data processing and model building

Imaging parameters and model statistics for *L. donovani* and human ribosomes

|                                      | <i>Leishmania donovani</i> |                  | Human                     |                  |
|--------------------------------------|----------------------------|------------------|---------------------------|------------------|
| Microscope                           | FEI Titan Krios            |                  | FEI Titan Krios           |                  |
| Voltage (kV)                         | 300                        |                  | 300                       |                  |
| Camera                               | Gatan K2 (counting Mode)   |                  | Gatan K2 (counting Mode)  |                  |
| Energy-filter                        | None                       |                  | GIF Quantum Energy Filter |                  |
| Magnification                        | 62,422x                    |                  | 46,730x                   |                  |
| Å/pixel                              | 0.801                      |                  | 1.07                      |                  |
| Defocus (µm)                         | 1.1~2.5                    |                  | 1.0~3.63                  |                  |
| Total Dose (e/Å <sup>2</sup> )       | ~25                        |                  | ~25                       |                  |
| Micrographs                          | 4888                       |                  | 4091                      |                  |
| Particles selected                   | 213,108                    |                  | 175,708                   |                  |
| Resolution (Å)<br>(FSC≥0.143)        | 2.9 (averaged)             |                  | 3.6 (averaged)            |                  |
| <b>Refinement</b>                    |                            |                  |                           |                  |
|                                      | Large Subunit              | Small Subunit    | Large Subunit             | Small Subunit    |
| $R_{work}$ (overall)                 | 0.298 (30-2.9Å)            | 0.324 (30-2.9Å)  | 0.215 (50-3.6Å)           | 0.388 (50-3.6Å)  |
| $R_{free}$ (overall)                 | 0.327 (30-2.9Å)            | 0.317 (30-2.9Å)  | 0.208 (50-3.6Å)           | 0.345 (50-3.6Å)  |
| $R_{work}$ (highest resolution zone) | 0.496 (3.3-2.9Å)           | 0.497 (3.3-2.9Å) | 0.280 (4.1-3.6Å)          | 0.507 (4.1-3.6Å) |
| $R_{free}$ (highest resolution zone) | 0.543 (3.3-2.9Å)           | 0.456 (3.3-2.9Å) | 0.280 (4.1-3.6Å)          | 0.472 (4.1-3.6Å) |
| <b>Ramachandran plot</b>             |                            |                  |                           |                  |
| Most favored                         | 91.70%                     | 87.74%           | 90.31%                    | 83.71%           |
| Generously allowed                   | 7.36%                      | 9.33%            | 8.24%                     | 13.16%           |
| Disallowed regions                   | 0.93%                      | 2.93%            | 1.45%                     | 3.13%            |

**Supplementary Table 2. Summary of *L. donovani* LSU ribosomal protein models.**

Protein name = protein names according to previously established nomenclature<sup>4</sup>. NCBI GI# = numbers of *L. donovani* protein sequence taken from the NCBI database. Size = number of amino acids. Range modeled = portions of the protein which have been modeled.

| Protein name | NCBI GI#                | Accession #               | Size, aa | Range modeled, aa                | Percentage modeled |
|--------------|-------------------------|---------------------------|----------|----------------------------------|--------------------|
| uL2          | 154343633               | XP_001567762              | 260      | 2-254                            | 97%                |
| uL3          | 157874311               | XP_001685639              | 419      | 2-400                            | 97%                |
| uL4          | 398018739               | XP_003862534              | 373      | 4-370                            | 98%                |
| uL5          | 398015105               | XP_003860742              | 188      | 13-179                           | 89%                |
| uL6          | 398014912               | XP_003860646              | 190      | 2-188                            | 98%                |
| eL6          | 157866918               | XP_001682014              | 195      | 23-195                           | 89%                |
| eL8          | 398010596               | XP_003858495              | 348      | 109-338                          | 66%                |
| uL13         | 322502489,<br>157866762 | CBZ37572,<br>XP_001681936 | 222      | 2-222                            | 99%                |
| eL13         | 389594167               | XP_003722330              | 220      | 2-141, 172-214                   | 97%                |
| uL14         | 398023603               | XP_003864963              | 139      | 3-139                            | 99%                |
| eL14         | 2500362                 | Q25278                    | 175      | 2-169                            | 96%                |
| uL15         | 398023599               | XP_003864961              | 145      | 2-145                            | 99%                |
| eL15         | 398023219               | XP_003864771              | 204      | 2-204                            | 99%                |
| uL16         | 398009877               | XP_003858137              | 213      | 2-212                            | 99%                |
| uL18         | 398023217               | XP_003864770              | 305      | 5-133, 144-218, 229-265, 279-303 | 98%                |
| eL18         | 398024852               | XP_003865587              | 198      | 2-198                            | 99%                |
| eL19         | 398010301               | XP_003858348              | 245      | 2-197                            | 80%                |
| eL20         | 398022973               | XP_003864648              | 179      | 2-179                            | 99%                |
| eL21         | 398022682               | XP_003864503              | 159      | 2-159                            | 99%                |
| eL22         | 398024594               | XP_003865458              | 129      | 2-124                            | 95%                |
| uL22         | 398015811               | XP_003861094              | 166      | 2-156                            | 93%                |

|      |           |              |     |        |     |
|------|-----------|--------------|-----|--------|-----|
| uL23 | 262479179 | ACY68622     | 145 | 26-145 | 83% |
| uL24 | 154338505 | XP_001565477 | 143 | 3-122  | 84% |
| eL24 | 157876669 | XP_001686679 | 124 | 1-65   | 52% |
| eL27 | 322501931 | CBZ37014     | 134 | 2-134  | 99% |
| eL28 | 398011782 | XP_003859086 | 147 | 2-147  | 99% |
| uL29 | 398017267 | XP_003861821 | 127 | 2-127  | 99% |
| eL29 | 157877177 | XP_001686919 | 70  | 2-70   | 99% |
| uL30 | 398016835 | XP_003861605 | 252 | 25-252 | 90% |
| eL30 | 398022911 | XP_003864617 | 104 | 9-102  | 90% |
| eL31 | 398023505 | XP_003864914 | 183 | 74-183 | 60% |
| eL32 | 398023247 | XP_003864785 | 133 | 2-130  | 97% |
| eL33 | 398022442 | XP_003864383 | 144 | 13-144 | 92% |
| eL34 | 398024692 | XP_003865507 | 168 | 2-125  | 74% |
| eL36 | 398023221 | XP_003864772 | 105 | 3-101  | 94% |
| eL37 | 398021739 | XP_003864032 | 83  | 2-82   | 98% |
| eL38 | 398017241 | XP_003861808 | 83  | 2-76   | 90% |
| eL39 | 398019003 | XP_003862666 | 51  | 2-51   | 98% |
| eL40 | 157873328 | XP_001685176 | 128 | 77-128 | 41% |
| eL42 | 398021997 | XP_003864161 | 106 | 2-97   | 91% |
| eL43 | 398024312 | XP_003865317 | 92  | 2-92   | 99% |

**Supplementary Table 3. Summary of *L. donovani* SSU ribosomal protein models.**

Protein name = protein names according to previously established nomenclature<sup>4</sup>. NCBI GI# = numbers of *L. donovani* protein sequence taken from the NCBI database. Size = number of amino acids. Range modeled = portions of the protein which have been modeled.

| Protein name | NCBI GI#  | Accession #  | Size, aa | Range modeled, aa | Percentage modeled |
|--------------|-----------|--------------|----------|-------------------|--------------------|
| eS1          | 398022945 | XP_003864634 | 264      | 23-243            | 84%                |
| uS2          | 157877540 | XP_001687087 | 246      | 41-244            | 83%                |
| uS3          | 154343872 | XP_001567880 | 219      | 6-208             | 93%                |
| uS4          | 398024172 | XP_003865247 | 190      | 1-164             | 86%                |
| eS4          | 398012258 | XP_003859323 | 273      | 2-259             | 95%                |
| uS5          | 157868060 | XP_001682583 | 265      | 40-262            | 85%                |
| eS6          | 157869182 | XP_001683143 | 249      | 1-249             | 100%               |
| uS7          | 157865716 | XP_001681565 | 190      | 1-190             | 100%               |
| eS7          | 389592391 | XP_003721563 | 200      | 1-200             | 100%               |
| eS8          | 398016233 | XP_003861305 | 220      | 2-121, 155-220    | 85%                |
| uS8          | 146079973 | XP_001463917 | 130      | 2-130             | 99%                |
| uS9          | 146089618 | XP_001470429 | 149      | 10-149            | 94%                |
| uS10         | 157871666 | XP_001684382 | 116      | 15-116            | 88%                |
| eS10         | 398024120 | XP_003865221 | 153      | 38-129            | 60%                |
| uS11         | 157871656 | XP_001684377 | 144      | 8-143             | 94%                |
| uS12         | 154337202 | XP_001564834 | 143      | 2-143             | 99%                |
| uS13         | 146103213 | XP_001469509 | 153      | 6-153             | 97%                |
| uS14         | 146092321 | XP_001470262 | 57       | 20-57             | 67%                |
| uS15         | 154335862 | XP_001564167 | 151      | 2-142             | 93%                |
| uS17         | 389603968 | XP_003723129 | 173      | 11-159            | 86%                |
| eS17         | 401425230 | XP_003877100 | 143      | 3-123             | 85%                |
| uS19         | 157869287 | XP_001683195 | 152      | 16-136            | 80%                |
| eS19         | 398022518 | XP_003864421 | 179      | 19-163            | 81%                |

|       |           |              |     |       |     |
|-------|-----------|--------------|-----|-------|-----|
| eS21  | 146079840 | XP_001463877 | 164 | 4-86  | 51% |
| eS24  | 154345982 | XP_001568928 | 137 | 4-129 | 92% |
| eS26  | 157872803 | XP_001684928 | 112 | 1-104 | 93% |
| eS27  | 154335505 | XP_001563991 | 86  | 5-86  | 95% |
| eS28  | 154339409 | XP_001562396 | 87  | 20-87 | 78% |
| eS30  | 146093606 | XP_001466914 | 66  | 7-62  | 85% |
| RACK1 | 13625467  | AAK35068     | 312 | 1-308 | 99% |

#### Supplementary References:

- 1 Scheres, S. H. RELION: implementation of a Bayesian approach to cryo-EM structure determination. *Journal of structural biology* **180**, 519-530, (2012).
- 2 Kucukelbir, A., Sigworth, F. J. & Tagare, H. D. Quantifying the local resolution of cryo-EM density maps. *Nature methods* **11**, 63-65, (2014).
- 3 Hashem, Y. *et al.* High-resolution cryo-electron microscopy structure of the Trypanosoma brucei ribosome. *Nature* **494**, 385-389, (2013).
- 4 Ban, N. *et al.* A new system for naming ribosomal proteins. *Current Opinion in Structural Biology* **24**, 165-169, (2014).
